# Supplementary material for: Unbiased in silico design of pH-sensitive tetrapeptides
Source: Royal Society of Chemistry journal article supplement (doi:10.1039/d3cc02412a), 2023-01-01
Supplement: d3cc02412a2.xlsx [file d3cc02412a2.xlsx]

## Sheet: Sheet1
			Deprotonated Histidine						Protonated Histidine
Sequence	AP Score	Solubility	Mw (amu)	Larger Cluster	Shape Factor		Sequence	AP Score	Solubility	Mw (amu)	Larger Cluster	Shape Factor
AAAH	1.784	-1.61	422	420	0.811728		AAAH	1.415	-3.83	422	392	0.827267
AADH	1.674	-4.75	466	472	0.636267		AADH	1.714	-6.97	466	480	0.321873
AAEH	1.52	-4.74	479	384	0.684344		AAEH	1.665	-6.96	479	424	0.790662
AAFH	2.213	0.6	498	600	0.829544		AAFH	1.825	-1.62	498	600	0.453486
AAGH	1.777	-2.26	408	420	0.753275		AAGH	1.384	-4.48	408	392	0.556705
AAHA	1.672	-1.61	422	406	0.80934		AAHA	1.249	-3.83	422	238	0.352434
AAHD	1.731	-4.75	466	480	0.726131		AAHD	1.692	-6.97	466	464	0.582042
AAHE	1.612	-4.74	479	464	0.519235		AAHE	1.639	-6.96	479	472	0.641772
AAHF	2.178	0.6	498	600	0.722997		AAHF	1.792	-1.62	498	370	0.721585
AAHG	1.791	-2.26	408	420	0.796746		AAHG	1.301	-4.48	408	245	0.596553
AAHH	2.133	-1.22	488	600	0.569602		AAHH	1.184	-5.66	488	160	0.409172
AAHI	1.911	0.01	464	480	0.610425		AAHI	1.651	-2.21	464	472	0.750481
AAHK	1.793	-3.91	479	540	0.539157		AAHK	1.263	-6.13	479	243	0.459572
AAHL	2.011	0.14	464	480	0.878396		AAHL	1.57	-2.08	464	480	0.358261
AAHN	1.88	-1.96	465	480	0.782183		AAHN	1.355	-4.18	465	352	0.545252
AAHQ	1.825	-1.88	480	472	0.709644		AAHQ	1.31	-4.1	480	368	0.650661
AAHR	1.739	-2.92	507	540	0.445888		AAHR	1.232	-5.14	507	297	0.173244
AAHT	1.945	-1.36	452	480	0.822665		AAHT	1.681	-3.58	452	480	0.572115
AAHV	1.936	-0.65	450	480	0.900866		AAHV	1.636	-2.87	450	480	0.814314
AAHY	2.144	-0.4	514	600	0.782986		AAHY	1.748	-2.62	514	460	0.672444
AAIH	1.938	0.01	464	480	0.849466		AAIH	1.589	-2.21	464	464	0.746103
AAKH	1.889	-3.91	479	540	0.761275		AAKH	1.205	-6.13	479	189	0.35674
AALH	1.908	0.14	464	480	0.930857		AALH	1.551	-2.08	464	472	0.79411
AANH	2.05	-1.96	465	480	0.850083		AANH	1.321	-4.18	465	240	0.792902
AAQH	1.757	-1.88	480	480	0.891027		AAQH	1.363	-4.1	480	400	0.287236
AARH	1.813	-2.92	507	540	0.859262		AARH	1.252	-5.14	507	117	0.511678
AATH	1.864	-1.36	452	472	0.844458		AATH	1.635	-3.58	452	472	0.784358
AAVH	1.98	-0.65	450	480	0.712685		AAVH	1.603	-2.87	450	464	0.569071
AAYH	1.9	-0.4	514	350	0.837951		AAYH	1.893	-2.62	514	600	0.60739
ADAH	1.698	-4.75	466	472	0.576182		ADAH	1.69	-6.97	466	424	0.587725
ADDH	1.418	-7.89	510	495	0.340755		ADDH	1.64	-10.11	510	540	0.793884
ADEH	1.404	-7.88	523	513	0.400756		ADEH	1.592	-10.1	523	531	0.384257
ADFH	2.073	-2.54	542	660	0.692398		ADFH	2.067	-4.76	542	660	0.484149
ADGH	1.744	-5.4	452	464	0.57033		ADGH	1.696	-7.62	452	280	0.804546
ADHA	1.615	-4.75	466	464	0.659454		ADHA	1.674	-6.97	466	464	0.439712
ADHD	1.336	-7.89	510	432	0.180813		ADHD	1.544	-10.11	510	288	0.411326
ADHE	1.351	-7.88	523	378	0.315417		ADHE	1.511	-10.1	523	522	0.340247
ADHF	2.3	-2.54	542	660	0.571141		ADHF	2.189	-4.76	542	660	0.363344
ADHG	1.72	-5.4	452	480	0.665806		ADHG	1.799	-7.62	452	472	0.553592
ADHH	1.827	-4.36	532	660	0.14333		ADHH	1.686	-8.8	532	649	0.516785
ADHI	1.956	-3.13	508	540	0.59807		ADHI	1.954	-5.35	508	540	0.365336
ADHK	1.858	-7.05	523	600	0.420163		ADHK	1.663	-9.27	523	600	0.477115
ADHL	1.807	-3	508	540	0.574071		ADHL	2.013	-5.22	508	540	0.433337
ADHN	1.804	-5.1	509	486	0.687483		ADHN	1.76	-7.32	509	378	0.73025
ADHQ	1.531	-5.02	524	360	0.619817		ADHQ	1.706	-7.24	524	540	0.300799
ADHR	2.119	-6.06	551	600	0.681966		ADHR	1.843	-8.28	551	590	0.589274
ADHT	1.948	-4.5	496	522	0.787022		ADHT	1.946	-6.72	496	540	0.562677
ADHV	1.894	-3.79	494	540	0.64452		ADHV	2.015	-6.01	494	540	0.410905
ADHY	2.052	-3.54	558	660	0.559812		ADHY	2.027	-5.76	558	660	0.33011
ADIH	1.862	-3.13	508	540	0.843769		ADIH	1.888	-5.35	508	540	0.444535
ADKH	2.073	-7.05	523	600	0.509269		ADKH	1.665	-9.27	523	600	0.243075
ADLH	1.798	-3	508	540	0.688887		ADLH	1.852	-5.22	508	540	0.399027
ADNH	1.769	-5.1	509	540	0.868701		ADNH	1.82	-7.32	509	531	0.677969
ADQH	1.584	-5.02	524	504	0.526353		ADQH	1.869	-7.24	524	522	0.518337
ADRH	2.056	-6.06	551	600	0.502368		ADRH	1.669	-8.28	551	590	0.224065
ADTH	1.913	-4.5	496	540	0.502688		ADTH	2.088	-6.72	496	540	0.711214
ADVH	1.836	-3.79	494	540	0.444231		ADVH	1.91	-6.01	494	540	0.626113
ADYH	2.044	-3.54	558	660	0.576363		ADYH	1.92	-5.76	558	660	0.372975
AEAH	1.61	-4.74	479	464	0.480146		AEAH	1.715	-6.96	479	480	0.804304
AEDH	1.37	-7.88	523	342	0.475356		AEDH	1.522	-10.1	523	288	0.444963
AEEH	1.356	-7.87	536	512	0.303825		AEEH	1.592	-10.09	536	495	0.707071
AEFH	2.135	-2.53	555	660	0.420538		AEFH	1.954	-4.75	555	660	0.395418
AEGH	1.649	-5.39	465	464	0.785286		AEGH	1.582	-7.61	465	400	0.500451
AEHA	1.622	-4.74	479	472	0.791295		AEHA	1.532	-6.96	479	448	0.458075
AEHD	1.399	-7.88	523	432	0.614305		AEHD	1.591	-10.1	523	531	0.565251
AEHE	1.231	-7.87	536	162	0.524219		AEHE	1.4	-10.09	536	513	0.7798
AEHF	2.064	-2.53	555	660	0.404112		AEHF	1.956	-4.75	555	396	0.663813
AEHG	1.454	-5.39	465	328	0.648499		AEHG	1.678	-7.61	465	480	0.666286
AEHH	1.911	-4.35	545	649	0.658675		AEHH	1.548	-8.79	545	429	0.621445
AEHI	1.855	-3.12	521	531	0.405707		AEHI	1.828	-5.34	521	468	0.549205
AEHK	1.977	-7.04	536	590	0.517659		AEHK	1.646	-9.26	536	560	0.805574
AEHL	1.767	-2.99	521	540	0.527305		AEHL	1.74	-5.21	521	279	0.809446
AEHN	1.886	-5.09	522	540	0.378045		AEHN	1.941	-7.31	522	540	0.609392
AEHQ	1.462	-5.01	537	468	0.448971		AEHQ	1.736	-7.23	537	522	0.621403
AEHR	1.972	-6.05	564	600	0.685189		AEHR	1.654	-8.27	564	520	0.2773
AEHT	1.869	-4.49	509	540	0.652662		AEHT	2.005	-6.71	509	540	0.393573
AEHV	1.887	-3.78	507	540	0.651698		AEHV	1.862	-6	507	540	0.488317
AEHY	2.042	-3.53	571	660	0.404441		AEHY	2	-5.75	571	660	0.299283
AEIH	1.795	-3.12	521	531	0.850172		AEIH	1.841	-5.34	521	540	0.463185
AEKH	2.1	-7.04	536	600	0.707078		AEKH	1.658	-9.26	536	590	0.494344
AELH	1.841	-2.99	521	522	0.643224		AELH	1.869	-5.21	521	540	0.79099
AENH	1.635	-5.09	522	522	0.440665		AENH	1.771	-7.31	522	540	0.321828
AEQH	1.719	-5.01	537	540	0.613504		AEQH	1.785	-7.23	537	531	0.69983
AERH	2.069	-6.05	564	600	0.72571		AERH	1.763	-8.27	564	590	0.657806
AETH	1.764	-4.49	509	531	0.377363		AETH	1.898	-6.71	509	540	0.593922
AEVH	1.907	-3.78	507	540	0.769016		AEVH	1.934	-6	507	531	0.683192
AEYH	1.872	-3.53	571	660	0.56817		AEYH	1.934	-5.75	571	407	0.612286
AFAH	2.016	0.6	498	600	0.725637		AFAH	1.592	-1.62	498	300	0.657641
AFDH	1.896	-2.54	542	660	0.651254		AFDH	1.991	-4.76	542	660	0.59257
AFEH	1.862	-2.53	555	660	0.436694		AFEH	1.845	-4.75	555	660	0.214882
AFFH	2.23	2.81	574	780	0.625979		AFFH	1.92	0.59	574	611	0.644997
AFGH	2.025	-0.05	484	600	0.668788		AFGH	1.633	-2.27	484	320	0.855139
AFHA	2.112	0.6	498	600	0.758367		AFHA	1.849	-1.62	498	600	0.645451
AFHD	1.901	-2.54	542	660	0.264244		AFHD	1.906	-4.76	542	429	0.659182
AFHE	1.969	-2.53	555	660	0.337177		AFHE	2.012	-4.75	555	660	0.597426
AFHF	2.361	2.81	574	780	0.798406		AFHF	2.08	0.59	574	780	0.393478
AFHG	1.999	-0.05	484	600	0.637938		AFHG	1.894	-2.27	484	600	0.340329
AFHH	1.962	0.99	564	559	0.512958		AFHH	1.412	-3.45	564	260	0.732072
AFHI	2.205	2.22	540	660	0.591772		AFHI	1.948	0	540	660	0.453523
AFHK	1.939	-1.7	555	612	0.570896		AFHK	1.663	-3.92	555	360	0.708554
AFHL	2.232	2.35	540	660	0.782689		AFHL	2.062	0.13	540	660	0.805819
AFHN	2.1	0.25	541	660	0.625198		AFHN	1.817	-1.97	541	418	0.679683
AFHQ	2.058	0.33	556	660	0.733966		AFHQ	1.78	-1.89	556	517	0.715159
AFHR	1.976	-0.71	583	720	0.341925		AFHR	1.657	-2.93	583	720	0.221133
AFHT	2.234	0.85	528	660	0.580236		AFHT	1.868	-1.37	528	396	0.54491
AFHV	2.304	1.56	526	660	0.842121		AFHV	2.099	-0.66	526	660	0.78278
AFHY	2.393	1.81	590	780	0.466166		AFHY	2.061	-0.41	590	780	0.579105
AFIH	2.147	2.22	540	660	0.80924		AFIH	1.76	0	540	462	0.753652
AFKH	1.964	-1.7	555	720	0.340783		AFKH	1.634	-3.92	555	720	0.256834
AFLH	2.109	2.35	540	660	0.82016		AFLH	1.885	0.13	540	660	0.732752
AFNH	2.113	0.25	541	660	0.721581		AFNH	1.703	-1.97	541	484	0.638761
AFQH	1.957	0.33	556	660	0.686247		AFQH	1.698	-1.89	556	462	0.617752
AFRH	2.052	-0.71	583	720	0.648185		AFRH	1.583	-2.93	583	588	0.444421
AFTH	2.108	0.85	528	660	0.660659		AFTH	1.829	-1.37	528	484	0.736021
AFVH	2.073	1.56	526	660	0.75596		AFVH	1.97	-0.66	526	660	0.831659
AFYH	2.368	1.81	590	780	0.615408		AFYH	1.86	-0.41	590	637	0.391507
AGAH	1.797	-2.26	408	420	0.862606		AGAH	1.412	-4.48	408	385	0.597648
AGDH	1.73	-5.4	452	472	0.584866		AGDH	1.948	-7.62	452	480	0.656347
AGEH	1.648	-5.39	465	464	0.619241		AGEH	1.84	-7.61	465	480	0.816216
AGFH	1.835	-0.05	484	430	0.645073		AGFH	1.903	-2.27	484	590	0.720299
AGGH	1.852	-2.91	394	420	0.801935		AGGH	1.487	-5.13	394	413	0.574144
AGHA	1.737	-2.26	408	420	0.627458		AGHA	1.326	-4.48	408	287	0.450344
AGHD	1.737	-5.4	452	480	0.748365		AGHD	1.79	-7.62	452	480	0.530727
AGHE	1.663	-5.39	465	480	0.569779		AGHE	1.662	-7.61	465	384	0.744427
AGHF	2.167	-0.05	484	600	0.578036		AGHF	1.883	-2.27	484	600	0.660537
AGHG	1.782	-2.91	394	420	0.831791		AGHG	1.389	-5.13	394	378	0.446329
AGHH	2.14	-1.87	474	600	0.782583		AGHH	1.22	-6.31	474	170	0.340937
AGHI	1.922	-0.64	450	480	0.840008		AGHI	1.594	-2.86	450	232	0.782084
AGHK	1.822	-4.56	465	540	0.732388		AGHK	1.305	-6.78	465	468	0.25224
AGHL	1.86	-0.51	450	480	0.699697		AGHL	1.615	-2.73	450	480	0.76804
AGHN	1.843	-2.61	451	416	0.858612		AGHN	1.401	-4.83	451	312	0.557446
AGHQ	1.77	-2.53	466	480	0.718139		AGHQ	1.348	-4.75	466	320	0.691944
AGHR	1.803	-3.57	493	540	0.350497		AGHR	1.346	-5.79	493	378	0.346387
AGHT	1.739	-2.01	438	256	0.739593		AGHT	1.7	-4.23	438	472	0.847727
AGHV	1.951	-1.3	436	480	0.881102		AGHV	1.69	-3.52	436	480	0.604422
AGHY	2.15	-1.05	500	600	0.669847		AGHY	1.77	-3.27	500	500	0.81464
AGIH	1.916	-0.64	450	472	0.893851		AGIH	1.663	-2.86	450	480	0.824878
AGKH	1.816	-4.56	465	531	0.83985		AGKH	1.325	-6.78	465	225	0.742334
AGLH	1.889	-0.51	450	480	0.776942		AGLH	1.708	-2.73	450	464	0.86934
AGNH	1.95	-2.61	451	480	0.851936		AGNH	1.413	-4.83	451	360	0.623467
AGQH	1.804	-2.53	466	472	0.797071		AGQH	1.488	-4.75	466	432	0.363421
AGRH	1.805	-3.57	493	540	0.423084		AGRH	1.349	-5.79	493	225	0.689458
AGTH	2.02	-2.01	438	480	0.827785		AGTH	1.663	-4.23	438	480	0.57969
AGVH	1.863	-1.3	436	480	0.364093		AGVH	1.555	-3.52	436	424	0.657452
AGYH	1.9	-1.05	500	300	0.927085		AGYH	1.743	-3.27	500	600	0.350223
AHAA	1.527	-1.61	422	266	0.68362		AHAA	1.236	-3.83	422	259	0.419726
AHAD	1.575	-4.75	466	472	0.486714		AHAD	1.497	-6.97	466	360	0.845424
AHAE	1.483	-4.74	479	472	0.45361		AHAE	1.564	-6.96	479	472	0.871162
AHAF	2.099	0.6	498	600	0.784126		AHAF	1.808	-1.62	498	600	0.444723
AHAG	1.802	-2.26	408	413	0.801211		AHAG	1.306	-4.48	408	301	0.678386
AHAH	1.779	-1.22	488	310	0.599148		AHAH	1.129	-5.66	488	120	0.710239
AHAI	1.853	0.01	464	480	0.842929		AHAI	1.458	-2.21	464	472	0.399283
AHAK	1.688	-3.91	479	540	0.763714		AHAK	1.181	-6.13	479	153	0.703429
AHAL	1.84	0.14	464	480	0.802565		AHAL	1.57	-2.08	464	480	0.578741
AHAN	1.623	-1.96	465	328	0.70732		AHAN	1.241	-4.18	465	368	0.566365
AHAQ	1.708	-1.88	480	464	0.703891		AHAQ	1.15	-4.1	480	168	0.436987
AHAR	1.754	-2.92	507	540	0.551118		AHAR	1.165	-5.14	507	126	0.559666
AHAT	1.968	-1.36	452	480	0.751484		AHAT	1.535	-3.58	452	456	0.527197
AHAV	1.724	-0.65	450	280	0.703955		AHAV	1.708	-2.87	450	480	0.820067
AHAY	2.106	-0.4	514	600	0.569547		AHAY	1.795	-2.62	514	600	0.882567
AHDA	1.539	-4.75	466	352	0.689837		AHDA	1.596	-6.97	466	464	0.592671
AHDD	1.351	-7.89	510	504	0.687665		AHDD	1.622	-10.11	510	540	0.280275
AHDE	1.335	-7.88	523	450	0.343687		AHDE	1.509	-10.1	523	486	0.352457
AHDF	1.795	-2.54	542	418	0.847688		AHDF	1.872	-4.76	542	429	0.622693
AHDG	1.666	-5.4	452	472	0.653988		AHDG	1.663	-7.62	452	472	0.408238
AHDH	1.677	-4.36	532	418	0.756366		AHDH	1.417	-8.8	532	638	0.233997
AHDI	1.684	-3.13	508	540	0.366324		AHDI	1.791	-5.35	508	540	0.5388
AHDK	2.04	-7.05	523	600	0.649006		AHDK	1.634	-9.27	523	300	0.780549
AHDL	1.727	-3	508	531	0.555218		AHDL	1.888	-5.22	508	540	0.708798
AHDN	1.592	-5.1	509	270	0.733176		AHDN	1.761	-7.32	509	540	0.39503
AHDQ	1.536	-5.02	524	504	0.686212		AHDQ	1.702	-7.24	524	540	0.742097
AHDR	2.058	-6.06	551	600	0.481432		AHDR	1.619	-8.28	551	590	0.53269
AHDT	1.775	-4.5	496	531	0.606227		AHDT	1.848	-6.72	496	468	0.478527
AHDV	1.788	-3.79	494	540	0.418259		AHDV	1.731	-6.01	494	360	0.697074
AHDY	1.98	-3.54	558	660	0.75342		AHDY	2.051	-5.76	558	660	0.75152
AHEA	1.454	-4.74	479	416	0.554606		AHEA	1.6	-6.96	479	456	0.463317
AHED	1.324	-7.88	523	414	0.715366		AHED	1.564	-10.1	523	540	0.614168
AHEE	1.238	-7.87	536	234	0.687146		AHEE	1.346	-10.09	536	225	0.444413
AHEF	1.899	-2.53	555	660	0.476752		AHEF	1.975	-4.75	555	660	0.73994
AHEG	1.564	-5.39	465	472	0.515175		AHEG	1.707	-7.61	465	472	0.707098
AHEH	1.637	-4.35	545	638	0.269691		AHEH	1.503	-8.79	545	440	0.430824
AHEI	1.694	-3.12	521	540	0.363249		AHEI	1.699	-5.34	521	324	0.693154
AHEK	1.904	-7.04	536	600	0.659813		AHEK	1.598	-9.26	536	600	0.309339
AHEL	1.729	-2.99	521	540	0.675892		AHEL	1.782	-5.21	521	540	0.290723
AHEN	1.654	-5.09	522	513	0.816267		AHEN	1.688	-7.31	522	540	0.292866
AHEQ	1.546	-5.01	537	522	0.392709		AHEQ	1.788	-7.23	537	531	0.679012
AHER	1.958	-6.05	564	600	0.613708		AHER	1.573	-8.27	564	580	0.302939
AHET	1.729	-4.49	509	540	0.469011		AHET	1.905	-6.71	509	531	0.633429
AHEV	1.702	-3.78	507	540	0.791559		AHEV	1.905	-6	507	531	0.800293
AHEY	1.838	-3.53	571	660	0.647022		AHEY	1.85	-5.75	571	660	0.440618
AHFA	2.13	0.6	498	600	0.88198		AHFA	1.954	-1.62	498	600	0.603791
AHFD	2.006	-2.54	542	660	0.315308		AHFD	1.982	-4.76	542	660	0.389481
AHFE	1.838	-2.53	555	660	0.365958		AHFE	1.904	-4.75	555	660	0.313966
AHFF	2.241	2.81	574	702	0.814617		AHFF	1.986	0.59	574	650	0.54559
AHFG	1.9	-0.05	484	340	0.727463		AHFG	1.695	-2.27	484	320	0.597805
AHFH	2.124	0.99	564	780	0.425533		AHFH	1.651	-3.45	564	351	0.496684
AHFI	2.133	2.22	540	660	0.880865		AHFI	1.978	0	540	660	0.609995
AHFK	2.071	-1.7	555	720	0.322249		AHFK	1.696	-3.92	555	576	0.321779
AHFL	2.025	2.35	540	572	0.785619		AHFL	1.985	0.13	540	660	0.724007
AHFN	1.933	0.25	541	418	0.779695		AHFN	1.872	-1.97	541	660	0.249455
AHFQ	2.091	0.33	556	660	0.726856		AHFQ	1.711	-1.89	556	528	0.521877
AHFR	1.997	-0.71	583	720	0.479627		AHFR	1.721	-2.93	583	492	0.386756
AHFT	2.132	0.85	528	539	0.771513		AHFT	2.06	-1.37	528	660	0.770055
AHFV	2.153	1.56	526	660	0.650609		AHFV	1.971	-0.66	526	660	0.658069
AHFY	2.487	1.81	590	780	0.540057		AHFY	2.004	-0.41	590	780	0.395207
AHGA	1.563	-2.26	408	259	0.709938		AHGA	1.289	-4.48	408	294	0.669549
AHGD	1.686	-5.4	452	456	0.842122		AHGD	1.752	-7.62	452	480	0.478795
AHGE	1.561	-5.39	465	456	0.590361		AHGE	1.669	-7.61	465	480	0.582262
AHGF	2.147	-0.05	484	600	0.87246		AHGF	1.684	-2.27	484	370	0.898874
AHGG	1.674	-2.91	394	420	0.77945		AHGG	1.4	-5.13	394	406	0.50279
AHGH	1.787	-1.87	474	490	0.601175		AHGH	1.224	-6.31	474	260	0.217623
AHGI	1.818	-0.64	450	480	0.785519		AHGI	1.661	-2.86	450	480	0.724564
AHGK	1.706	-4.56	465	540	0.594705		AHGK	1.292	-6.78	465	297	0.370248
AHGL	1.808	-0.51	450	480	0.772546		AHGL	1.614	-2.73	450	480	0.430982
AHGN	1.631	-2.61	451	336	0.677974		AHGN	1.426	-4.83	451	448	0.752631
AHGQ	1.736	-2.53	466	472	0.611053		AHGQ	1.275	-4.75	466	360	0.322747
AHGR	1.655	-3.57	493	540	0.645036		AHGR	1.2	-5.79	493	306	0.385882
AHGT	1.918	-2.01	438	480	0.798525		AHGT	1.585	-4.23	438	480	0.583612
AHGV	1.817	-1.3	436	472	0.854522		AHGV	1.584	-3.52	436	472	0.62725
AHGY	1.89	-1.05	500	500	0.829779		AHGY	1.698	-3.27	500	350	0.680309
AHHA	2.062	-1.22	488	600	0.660416		AHHA	1.113	-5.66	488	130	0.575674
AHHD	1.851	-4.36	532	649	0.34241		AHHD	1.457	-8.8	532	363	0.429663
AHHE	1.88	-4.35	545	638	0.515944		AHHE	1.387	-8.79	545	517	0.460643
AHHF	2.292	0.99	564	780	0.438323		AHHF	1.535	-3.45	564	247	0.821545
AHHG	1.929	-1.87	474	600	0.34738		AHHG	1.2	-6.31	474	140	0.31023
AHHH	1.887	-0.83	554	364	0.528861		AHHH	1.072	-7.49	554	91	0.211445
AHHI	2.139	0.4	530	660	0.630413		AHHI	1.436	-4.04	530	363	0.264199
AHHK	2.009	-3.52	545	720	0.423132		AHHK	1.148	-7.96	545	180	0.495529
AHHL	1.991	0.53	530	539	0.824042		AHHL	1.405	-3.91	530	660	0.224529
AHHN	2.178	-1.57	531	660	0.539464		AHHN	1.223	-6.01	531	220	0.554602
AHHQ	1.886	-1.49	546	660	0.432972		AHHQ	1.12	-5.93	546	121	0.592494
AHHR	1.84	-2.53	573	720	0.242269		AHHR	1.165	-6.97	573	108	0.584115
AHHT	2.191	-0.97	518	660	0.68371		AHHT	1.432	-5.41	518	638	0.478947
AHHV	2.179	-0.26	516	660	0.739477		AHHV	1.447	-4.7	516	495	0.478553
AHHY	1.915	-0.01	580	442	0.669794		AHHY	1.485	-4.45	580	260	0.42211
AHIA	1.789	0.01	464	480	0.759351		AHIA	1.585	-2.21	464	456	0.714245
AHID	1.766	-3.13	508	540	0.63295		AHID	1.717	-5.35	508	540	0.176773
AHIE	1.704	-3.12	521	540	0.483988		AHIE	1.592	-5.34	521	486	0.436991
AHIF	2.1	2.22	540	660	0.777648		AHIF	1.818	0	540	418	0.786408
AHIG	1.834	-0.64	450	464	0.842869		AHIG	1.63	-2.86	450	464	0.44656
AHIH	1.99	0.4	530	660	0.382917		AHIH	1.371	-4.04	530	473	0.326133
AHII	1.985	1.63	506	540	0.769126		AHII	1.735	-0.59	506	540	0.807141
AHIK	1.9	-2.29	521	600	0.674546		AHIK	1.444	-4.51	521	570	0.589604
AHIL	1.911	1.76	506	540	0.820252		AHIL	1.73	-0.46	506	540	0.608453
AHIN	1.888	-0.34	507	540	0.832311		AHIN	1.541	-2.56	507	513	0.267003
AHIQ	1.837	-0.26	522	540	0.705765		AHIQ	1.488	-2.48	522	504	0.530622
AHIR	1.846	-1.3	549	600	0.741753		AHIR	1.426	-3.52	549	360	0.440136
AHIT	2.102	0.26	494	540	0.865252		AHIT	1.633	-1.96	494	369	0.716159
AHIV	1.803	0.97	492	333	0.847138		AHIV	1.812	-1.25	492	540	0.770847
AHIY	2.044	1.22	556	660	0.622325		AHIY	1.9	-1	556	660	0.445096
AHKA	1.641	-3.91	479	324	0.624662		AHKA	1.16	-6.13	479	189	0.306734
AHKD	2.089	-7.05	523	600	0.842107		AHKD	1.616	-9.27	523	600	0.321613
AHKE	1.882	-7.04	536	600	0.599546		AHKE	1.453	-9.26	536	560	0.319633
AHKF	2.124	-1.7	555	720	0.480638		AHKF	1.624	-3.92	555	708	0.331923
AHKG	1.773	-4.56	465	540	0.401636		AHKG	1.213	-6.78	465	369	0.512728
AHKH	1.93	-3.52	545	720	0.2881		AHKH	1.122	-7.96	545	72	0.293304
AHKI	1.95	-2.29	521	600	0.780831		AHKI	1.46	-4.51	521	370	0.349249
AHKK	1.633	-6.21	536	660	0.278433		AHKK	1.112	-8.43	536	121	0.370097
AHKL	1.886	-2.16	521	600	0.714712		AHKL	1.496	-4.38	521	340	0.462043
AHKN	1.835	-4.26	522	590	0.691414		AHKN	1.181	-6.48	522	150	0.445811
AHKQ	1.739	-4.18	537	600	0.41212		AHKQ	1.134	-6.4	537	100	0.794706
AHKR	1.513	-5.22	564	638	0.368879		AHKR	1.128	-7.44	564	143	0.134957
AHKT	1.923	-3.66	509	600	0.76388		AHKT	1.455	-5.88	509	540	0.245506
AHKV	1.999	-2.95	507	600	0.85282		AHKV	1.5	-5.17	507	590	0.219621
AHKY	2.113	-2.7	571	720	0.746561		AHKY	1.586	-4.92	571	684	0.238494
AHLA	1.798	0.14	464	480	0.697986		AHLA	1.587	-2.08	464	464	0.50213
AHLD	1.719	-3	508	531	0.720737		AHLD	1.829	-5.22	508	531	0.815571
AHLE	1.706	-2.99	521	531	0.756719		AHLE	1.643	-5.21	521	387	0.743206
AHLF	2.2	2.35	540	660	0.901253		AHLF	1.883	0.13	540	660	0.742449
AHLG	1.685	-0.51	450	264	0.772932		AHLG	1.562	-2.73	450	480	0.820441
AHLH	2.031	0.53	530	660	0.705088		AHLH	1.326	-3.91	530	264	0.581039
AHLI	1.939	1.76	506	540	0.845362		AHLI	1.779	-0.46	506	540	0.811309
AHLK	1.691	-2.16	521	390	0.817594		AHLK	1.405	-4.38	521	570	0.388254
AHLL	1.936	1.89	506	540	0.916196		AHLL	1.627	-0.33	506	342	0.609078
AHLN	1.904	-0.21	507	540	0.765322		AHLN	1.603	-2.43	507	522	0.493304
AHLQ	1.647	-0.13	522	333	0.757292		AHLQ	1.485	-2.35	522	513	0.457393
AHLR	1.752	-1.17	549	600	0.423812		AHLR	1.445	-3.39	549	300	0.443532
AHLT	1.969	0.39	494	540	0.879731		AHLT	1.749	-1.83	494	540	0.687237
AHLV	1.964	1.1	492	540	0.869149		AHLV	1.727	-1.12	492	540	0.591584
AHLY	2.137	1.35	556	660	0.528158		AHLY	1.909	-0.87	556	660	0.808142
AHNA	1.723	-1.96	465	424	0.803407		AHNA	1.213	-4.18	465	120	0.865089
AHND	1.699	-5.1	509	540	0.653561		AHND	1.884	-7.32	509	531	0.627756
AHNE	1.678	-5.09	522	522	0.524783		AHNE	1.703	-7.31	522	531	0.521178
AHNF	2.116	0.25	541	660	0.60631		AHNF	1.886	-1.97	541	638	0.487568
AHNG	1.787	-2.61	451	472	0.581103		AHNG	1.371	-4.83	451	400	0.455769
AHNH	2.048	-1.57	531	660	0.766116		AHNH	1.187	-6.01	531	165	0.352034
AHNI	1.867	-0.34	507	540	0.765482		AHNI	1.508	-2.56	507	243	0.710754
AHNK	1.73	-4.26	522	580	0.532725		AHNK	1.278	-6.48	522	460	0.577221
AHNL	1.765	-0.21	507	279	0.784906		AHNL	1.697	-2.43	507	540	0.484876
AHNN	1.839	-2.31	508	531	0.469186		AHNN	1.309	-4.53	508	297	0.285558
AHNQ	1.716	-2.23	523	531	0.414924		AHNQ	1.259	-4.45	523	243	0.214165
AHNR	1.682	-3.27	550	520	0.482061		AHNR	1.199	-5.49	550	300	0.328614
AHNT	2.008	-1.71	495	540	0.340038		AHNT	1.685	-3.93	495	423	0.630651
AHNV	2.047	-1	493	540	0.925462		AHNV	1.66	-3.22	493	369	0.611907
AHNY	2.068	-0.75	557	660	0.83872		AHNY	1.769	-2.97	557	473	0.584987
AHQA	1.728	-1.88	480	464	0.794479		AHQA	1.155	-4.1	480	200	0.702668
AHQD	1.601	-5.02	524	540	0.509169		AHQD	1.815	-7.24	524	531	0.428214
AHQE	1.437	-5.01	537	396	0.543851		AHQE	1.696	-7.23	537	531	0.636532
AHQF	2.164	0.33	556	660	0.751098		AHQF	1.722	-1.89	556	572	0.432152
AHQG	1.706	-2.53	466	464	0.851878		AHQG	1.392	-4.75	466	352	0.616267
AHQH	1.96	-1.49	546	660	0.542331		AHQH	1.146	-5.93	546	143	0.632271
AHQI	1.842	-0.26	522	540	0.631464		AHQI	1.585	-2.48	522	531	0.51722
AHQK	1.702	-4.18	537	600	0.588049		AHQK	1.18	-6.4	537	340	0.35691
AHQL	1.824	-0.13	522	540	0.710827		AHQL	1.607	-2.35	522	540	0.473146
AHQN	1.876	-2.23	523	540	0.697908		AHQN	1.386	-4.45	523	423	0.503695
AHQQ	1.454	-2.15	538	288	0.742481		AHQQ	1.122	-4.37	538	90	0.389824
AHQR	1.711	-3.19	565	600	0.430586		AHQR	1.201	-5.41	565	250	0.712131
AHQT	1.904	-1.63	510	540	0.454561		AHQT	1.58	-3.85	510	513	0.462605
AHQV	1.884	-0.92	508	531	0.665652		AHQV	1.627	-3.14	508	531	0.604278
AHQY	2.082	-0.67	572	660	0.621283		AHQY	1.803	-2.89	572	660	0.578266
AHRA	1.731	-2.92	507	513	0.777088		AHRA	1.136	-5.14	507	90	0.782194
AHRD	1.759	-6.06	551	310	0.77362		AHRD	1.582	-8.28	551	590	0.49577
AHRE	1.779	-6.05	564	350	0.624727		AHRE	1.48	-8.27	564	590	0.346793
AHRF	1.971	-0.71	583	720	0.372626		AHRF	1.73	-2.93	583	708	0.325094
AHRG	1.77	-3.57	493	540	0.479474		AHRG	1.252	-5.79	493	378	0.330402
AHRH	1.895	-2.53	573	720	0.329002		AHRH	1.146	-6.97	573	96	0.49356
AHRI	1.848	-1.3	549	590	0.349075		AHRI	1.481	-3.52	549	350	0.403436
AHRK	1.548	-5.22	564	660	0.505379		AHRK	1.132	-7.44	564	99	0.381499
AHRL	1.878	-1.17	549	600	0.555595		AHRL	1.489	-3.39	549	390	0.50261
AHRN	1.935	-3.27	550	600	0.61687		AHRN	1.225	-5.49	550	180	0.597718
AHRQ	1.717	-3.19	565	600	0.398147		AHRQ	1.171	-5.41	565	130	0.457257
AHRR	1.589	-4.23	592	660	0.226632		AHRR	1.107	-6.45	592	66	0.478827
AHRT	1.911	-2.67	537	600	0.513251		AHRT	1.464	-4.89	537	490	0.645177
AHRV	1.902	-1.96	535	600	0.67306		AHRV	1.459	-4.18	535	590	0.356298
AHRY	1.981	-1.71	599	720	0.333067		AHRY	1.557	-3.93	599	708	0.575337
AHTA	1.91	-1.36	452	480	0.77453		AHTA	1.606	-3.58	452	464	0.781491
AHTD	1.801	-4.5	496	540	0.23075		AHTD	1.943	-6.72	496	540	0.405611
AHTE	1.75	-4.49	509	522	0.511929		AHTE	1.773	-6.71	509	540	0.405702
AHTF	2.201	0.85	528	660	0.571395		AHTF	1.794	-1.37	528	352	0.837936
AHTG	1.936	-2.01	438	480	0.872611		AHTG	1.651	-4.23	438	472	0.765117
AHTH	1.904	-0.97	518	429	0.812248		AHTH	1.317	-5.41	518	407	0.614591
AHTI	1.961	0.26	494	522	0.829837		AHTI	1.812	-1.96	494	540	0.50795
AHTK	1.887	-3.66	509	600	0.548028		AHTK	1.447	-5.88	509	590	0.289077
AHTL	1.915	0.39	494	531	0.631458		AHTL	1.78	-1.83	494	540	0.778266
AHTN	1.973	-1.71	495	540	0.39594		AHTN	1.616	-3.93	495	333	0.612322
AHTQ	1.79	-1.63	510	540	0.561699		AHTQ	1.58	-3.85	510	522	0.55608
AHTR	1.762	-2.67	537	600	0.471307		AHTR	1.429	-4.89	537	520	0.257432
AHTT	2.01	-1.11	482	540	0.53242		AHTT	1.798	-3.33	482	540	0.670398
AHTV	1.968	-0.4	480	540	0.748459		AHTV	1.719	-2.62	480	531	0.594071
AHTY	2.211	-0.15	544	660	0.682204		AHTY	1.756	-2.37	544	396	0.795717
AHVA	1.847	-0.65	450	464	0.771368		AHVA	1.487	-2.87	450	392	0.830025
AHVD	1.808	-3.79	494	540	0.64639		AHVD	1.732	-6.01	494	531	0.501405
AHVE	1.669	-3.78	507	441	0.69342		AHVE	1.784	-6	507	540	0.546977
AHVF	2.152	1.56	526	660	0.719719		AHVF	1.832	-0.66	526	396	0.711527
AHVG	1.909	-1.3	436	480	0.902757		AHVG	1.617	-3.52	436	480	0.649083
AHVH	2.088	-0.26	516	660	0.710212		AHVH	1.381	-4.7	516	385	0.195035
AHVI	1.96	0.97	492	540	0.766887		AHVI	1.64	-1.25	492	270	0.93288
AHVK	1.856	-2.95	507	600	0.858634		AHVK	1.479	-5.17	507	560	0.248738
AHVL	2.015	1.1	492	540	0.918899		AHVL	1.754	-1.12	492	540	0.849572
AHVN	1.886	-1	493	459	0.666406		AHVN	1.591	-3.22	493	405	0.512548
AHVQ	1.69	-0.92	508	414	0.617506		AHVQ	1.518	-3.14	508	513	0.249119
AHVR	1.784	-1.96	535	600	0.407649		AHVR	1.44	-4.18	535	300	0.766335
AHVT	2.033	-0.4	480	540	0.818983		AHVT	1.842	-2.62	480	540	0.756765
AHVV	2.05	0.31	478	540	0.890781		AHVV	1.646	-1.91	478	423	0.772701
AHVY	2.071	0.56	542	572	0.848387		AHVY	1.808	-1.66	542	440	0.709109
AHYA	1.752	-0.4	514	270	0.564684		AHYA	1.656	-2.62	514	470	0.568133
AHYD	2.029	-3.54	558	660	0.426112		AHYD	2.109	-5.76	558	660	0.39628
AHYE	1.98	-3.53	571	660	0.463017		AHYE	1.838	-5.75	571	506	0.444192
AHYF	2.448	1.81	590	780	0.619175		AHYF	1.994	-0.41	590	663	0.398115
AHYG	1.734	-1.05	500	280	0.697728		AHYG	1.725	-3.27	500	450	0.352168
AHYH	2.172	-0.01	580	780	0.702144		AHYH	1.434	-4.45	580	286	0.74159
AHYI	2.208	1.22	556	660	0.840788		AHYI	1.801	-1	556	407	0.731452
AHYK	1.981	-2.7	571	720	0.351303		AHYK	1.587	-4.92	571	708	0.329043
AHYL	2.037	1.35	556	506	0.795059		AHYL	1.963	-0.87	556	660	0.466191
AHYN	2.044	-0.75	557	660	0.708963		AHYN	1.939	-2.97	557	660	0.359491
AHYQ	1.983	-0.67	572	616	0.735571		AHYQ	1.8	-2.89	572	638	0.338785
AHYR	2.021	-1.71	599	720	0.48659		AHYR	1.688	-3.93	599	684	0.323817
AHYT	2.162	-0.15	544	660	0.35112		AHYT	1.882	-2.37	544	374	0.868502
AHYV	2.292	0.56	542	660	0.665931		AHYV	1.96	-1.66	542	660	0.487241
AHYY	2.154	0.81	606	507	0.758278		AHYY	2.279	-1.41	606	780	0.578286
AIAH	1.978	0.01	464	472	0.920907		AIAH	1.598	-2.21	464	480	0.72253
AIDH	1.758	-3.13	508	531	0.613474		AIDH	1.902	-5.35	508	540	0.488197
AIEH	1.752	-3.12	521	540	0.639376		AIEH	1.691	-5.34	521	315	0.721596
AIFH	1.96	2.22	540	341	0.792151		AIFH	2.051	0	540	660	0.763508
AIGH	1.925	-0.64	450	480	0.771868		AIGH	1.501	-2.86	450	296	0.699017
AIHA	1.802	0.01	464	480	0.793119		AIHA	1.6	-2.21	464	464	0.395441
AIHD	1.815	-3.13	508	540	0.777536		AIHD	1.969	-5.35	508	540	0.741743
AIHE	1.782	-3.12	521	540	0.633057		AIHE	1.635	-5.34	521	333	0.885141
AIHF	2.357	2.22	540	660	0.889953		AIHF	1.927	0	540	572	0.703008
AIHG	1.841	-0.64	450	480	0.867576		AIHG	1.635	-2.86	450	480	0.644526
AIHH	1.93	0.4	530	374	0.673598		AIHH	1.485	-4.04	530	319	0.516075
AIHI	1.824	1.63	506	387	0.793735		AIHI	1.822	-0.59	506	540	0.678769
AIHK	1.897	-2.29	521	600	0.715393		AIHK	1.516	-4.51	521	500	0.337655
AIHL	2.001	1.76	506	540	0.84301		AIHL	1.667	-0.46	506	360	0.714695
AIHN	2.007	-0.34	507	540	0.782433		AIHN	1.716	-2.56	507	531	0.497897
AIHQ	1.88	-0.26	522	540	0.706598		AIHQ	1.558	-2.48	522	531	0.347056
AIHR	1.853	-1.3	549	600	0.613874		AIHR	1.535	-3.52	549	600	0.426317
AIHT	2.118	0.26	494	540	0.754121		AIHT	1.677	-1.96	494	405	0.736213
AIHV	2.039	0.97	492	540	0.871266		AIHV	1.84	-1.25	492	531	0.63471
AIHY	2.213	1.22	556	660	0.653107		AIHY	1.909	-1	556	473	0.80342
AIIH	2.009	1.63	506	540	0.922754		AIIH	1.806	-0.59	506	540	0.748923
AIKH	1.932	-2.29	521	590	0.648602		AIKH	1.504	-4.51	521	570	0.28952
AILH	2.016	1.76	506	540	0.89609		AILH	1.833	-0.46	506	540	0.62408
AINH	2.026	-0.34	507	540	0.750066		AINH	1.628	-2.56	507	522	0.316138
AIQH	1.898	-0.26	522	540	0.717399		AIQH	1.636	-2.48	522	531	0.370794
AIRH	1.954	-1.3	549	600	0.501559		AIRH	1.497	-3.52	549	430	0.250884
AITH	2.067	0.26	494	531	0.925109		AITH	1.775	-1.96	494	531	0.644856
AIVH	1.992	0.97	492	540	0.857946		AIVH	1.84	-1.25	492	540	0.834452
AIYH	2.066	1.22	556	517	0.792464		AIYH	1.988	-1	556	660	0.681474
AKAH	1.911	-3.91	479	540	0.725086		AKAH	1.154	-6.13	479	144	0.398825
AKDH	2.031	-7.05	523	600	0.523403		AKDH	1.748	-9.27	523	580	0.580984
AKEH	2.018	-7.04	536	600	0.437679		AKEH	1.585	-9.26	536	560	0.303626
AKFH	2.084	-1.7	555	720	0.354998		AKFH	1.738	-3.92	555	720	0.351426
AKGH	1.791	-4.56	465	531	0.583888		AKGH	1.373	-6.78	465	522	0.224296
AKHA	1.852	-3.91	479	540	0.609882		AKHA	1.128	-6.13	479	99	0.648067
AKHD	2.11	-7.05	523	600	0.664427		AKHD	1.691	-9.27	523	300	0.555228
AKHE	1.895	-7.04	536	600	0.634298		AKHE	1.628	-9.26	536	580	0.619915
AKHF	2.144	-1.7	555	720	0.496132		AKHF	1.719	-3.92	555	360	0.624656
AKHG	1.836	-4.56	465	540	0.572321		AKHG	1.327	-6.78	465	477	0.512961
AKHH	2.008	-3.52	545	720	0.297683		AKHH	1.197	-7.96	545	120	0.163761
AKHI	1.969	-2.29	521	600	0.680991		AKHI	1.6	-4.51	521	600	0.377941
AKHK	1.596	-6.21	536	649	0.2959		AKHK	1.157	-8.43	536	110	0.239199
AKHL	1.946	-2.16	521	600	0.632299		AKHL	1.507	-4.38	521	470	0.335707
AKHN	1.969	-4.26	522	600	0.533273		AKHN	1.243	-6.48	522	240	0.361947
AKHQ	1.759	-4.18	537	590	0.503214		AKHQ	1.153	-6.4	537	80	0.613422
AKHR	1.517	-5.22	564	649	0.286725		AKHR	1.129	-7.44	564	77	0.582054
AKHT	1.961	-3.66	509	600	0.527885		AKHT	1.461	-5.88	509	590	0.552622
AKHV	1.87	-2.95	507	600	0.350157		AKHV	1.45	-5.17	507	380	0.419911
AKHY	2.195	-2.7	571	720	0.599952		AKHY	1.754	-4.92	571	720	0.534499
AKIH	1.958	-2.29	521	590	0.84472		AKIH	1.495	-4.51	521	580	0.268159
AKKH	1.6	-6.21	536	660	0.546076		AKKH	1.116	-8.43	536	88	0.618087
AKLH	1.865	-2.16	521	600	0.598002		AKLH	1.39	-4.38	521	510	0.517862
AKNH	1.814	-4.26	522	580	0.550336		AKNH	1.298	-6.48	522	490	0.565889
AKQH	1.748	-4.18	537	590	0.357215		AKQH	1.221	-6.4	537	190	0.351884
AKRH	1.498	-5.22	564	638	0.161349		AKRH	1.152	-7.44	564	99	0.294623
AKTH	1.829	-3.66	509	600	0.579262		AKTH	1.438	-5.88	509	560	0.57274
AKVH	1.953	-2.95	507	600	0.643638		AKVH	1.521	-5.17	507	370	0.277389
AKYH	2.034	-2.7	571	720	0.572286		AKYH	1.639	-4.92	571	492	0.398866
ALAH	1.882	0.14	464	480	0.844481		ALAH	1.527	-2.08	464	344	0.543846
ALDH	1.765	-3	508	540	0.69078		ALDH	1.84	-5.22	508	540	0.411874
ALEH	1.729	-2.99	521	531	0.716507		ALEH	1.772	-5.21	521	387	0.806557
ALFH	2.121	2.35	540	638	0.793977		ALFH	2.056	0.13	540	660	0.665998
ALGH	1.941	-0.51	450	480	0.822962		ALGH	1.593	-2.73	450	472	0.718097
ALHA	1.82	0.14	464	480	0.883513		ALHA	1.561	-2.08	464	448	0.352336
ALHD	1.825	-3	508	540	0.404797		ALHD	1.839	-5.22	508	540	0.63426
ALHE	1.757	-2.99	521	531	0.601265		ALHE	1.718	-5.21	521	513	0.604953
ALHF	2.217	2.35	540	660	0.796473		ALHF	1.99	0.13	540	660	0.439478
ALHG	1.923	-0.51	450	480	0.799552		ALHG	1.585	-2.73	450	464	0.681251
ALHH	2.181	0.53	530	660	0.913763		ALHH	1.487	-3.91	530	528	0.228878
ALHI	1.983	1.76	506	540	0.828323		ALHI	1.715	-0.46	506	540	0.631585
ALHK	1.941	-2.16	521	600	0.678831		ALHK	1.459	-4.38	521	410	0.631141
ALHL	2.015	1.89	506	531	0.928946		ALHL	1.749	-0.33	506	540	0.528678
ALHN	1.967	-0.21	507	540	0.724431		ALHN	1.626	-2.43	507	279	0.839452
ALHQ	1.86	-0.13	522	540	0.652939		ALHQ	1.577	-2.35	522	531	0.377779
ALHR	1.945	-1.17	549	600	0.756281		ALHR	1.484	-3.39	549	390	0.448954
ALHT	1.949	0.39	494	540	0.756858		ALHT	1.693	-1.83	494	378	0.682318
ALHV	2.001	1.1	492	540	0.731928		ALHV	1.791	-1.12	492	540	0.799165
ALHY	2.255	1.35	556	660	0.891355		ALHY	1.987	-0.87	556	660	0.757065
ALIH	2.018	1.76	506	540	0.817304		ALIH	1.747	-0.46	506	540	0.812929
ALKH	1.903	-2.16	521	600	0.622503		ALKH	1.52	-4.38	521	600	0.387792
ALLH	1.895	1.89	506	540	0.87469		ALLH	1.724	-0.33	506	540	0.841317
ALNH	1.901	-0.21	507	540	0.862018		ALNH	1.646	-2.43	507	540	0.347258
ALQH	1.905	-0.13	522	540	0.551042		ALQH	1.6	-2.35	522	531	0.11378
ALRH	1.885	-1.17	549	600	0.825784		ALRH	1.573	-3.39	549	400	0.365025
ALTH	1.995	0.39	494	540	0.786826		ALTH	1.796	-1.83	494	531	0.729187
ALVH	2.004	1.1	492	540	0.662241		ALVH	1.663	-1.12	492	315	0.707727
ALYH	2.319	1.35	556	660	0.947662		ALYH	1.845	-0.87	556	440	0.683057
ANAH	1.787	-1.96	465	480	0.691676		ANAH	1.249	-4.18	465	264	0.239303
ANDH	1.66	-5.1	509	540	0.780424		ANDH	1.846	-7.32	509	540	0.375558
ANEH	1.574	-5.09	522	396	0.534534		ANEH	1.936	-7.31	522	540	0.572017
ANFH	2.083	0.25	541	517	0.898515		ANFH	1.835	-1.97	541	396	0.560682
ANGH	1.728	-2.61	451	352	0.790093		ANGH	1.588	-4.83	451	472	0.533096
ANHA	1.723	-1.96	465	456	0.524772		ANHA	1.148	-4.18	465	104	0.68148
ANHD	1.842	-5.1	509	540	0.828973		ANHD	1.762	-7.32	509	540	0.144832
ANHE	1.745	-5.09	522	531	0.623782		ANHE	1.704	-7.31	522	477	0.468025
ANHF	2.197	0.25	541	660	0.371164		ANHF	1.811	-1.97	541	253	0.853628
ANHG	1.911	-2.61	451	480	0.773804		ANHG	1.36	-4.83	451	208	0.383204
ANHH	1.909	-1.57	531	484	0.603976		ANHH	1.185	-6.01	531	165	0.374323
ANHI	2.037	-0.34	507	540	0.534228		ANHI	1.704	-2.56	507	522	0.338005
ANHK	1.902	-4.26	522	600	0.519238		ANHK	1.27	-6.48	522	340	0.288375
ANHL	2.064	-0.21	507	540	0.74804		ANHL	1.672	-2.43	507	540	0.355548
ANHN	1.995	-2.31	508	531	0.652148		ANHN	1.501	-4.53	508	486	0.277361
ANHQ	1.754	-2.23	523	513	0.467985		ANHQ	1.231	-4.45	523	243	0.434014
ANHR	1.841	-3.27	550	580	0.750402		ANHR	1.246	-5.49	550	240	0.565148
ANHT	2.027	-1.71	495	540	0.550013		ANHT	1.706	-3.93	495	351	0.713608
ANHV	2.142	-1	493	540	0.806546		ANHV	1.822	-3.22	493	540	0.592791
ANHY	2.136	-0.75	557	440	0.844801		ANHY	1.901	-2.97	557	407	0.640214
ANIH	2.091	-0.34	507	540	0.735033		ANIH	1.703	-2.56	507	531	0.699094
ANKH	1.775	-4.26	522	540	0.846748		ANKH	1.277	-6.48	522	300	0.368063
ANLH	1.936	-0.21	507	531	0.670746		ANLH	1.692	-2.43	507	540	0.385121
ANNH	1.853	-2.31	508	450	0.64924		ANNH	1.583	-4.53	508	495	0.626464
ANQH	1.653	-2.23	523	261	0.545191		ANQH	1.25	-4.45	523	117	0.686374
ANRH	1.956	-3.27	550	600	0.677238		ANRH	1.282	-5.49	550	250	0.426008
ANTH	2.051	-1.71	495	540	0.568296		ANTH	1.673	-3.93	495	531	0.403224
ANVH	2.063	-1	493	540	0.748592		ANVH	1.755	-3.22	493	531	0.421243
ANYH	2.299	-0.75	557	660	0.700544		ANYH	1.752	-2.97	557	561	0.341908
AQAH	1.715	-1.88	480	448	0.445993		AQAH	1.246	-4.1	480	224	0.758365
AQDH	1.575	-5.02	524	531	0.617677		AQDH	1.756	-7.24	524	531	0.623133
AQEH	1.651	-5.01	537	531	0.453496		AQEH	1.632	-7.23	537	531	0.211243
AQFH	2.159	0.33	556	660	0.821855		AQFH	1.775	-1.89	556	396	0.598823
AQGH	1.87	-2.53	466	472	0.868135		AQGH	1.427	-4.75	466	424	0.698988
AQHA	1.73	-1.88	480	480	0.792589		AQHA	1.159	-4.1	480	104	0.367849
AQHD	1.61	-5.02	524	522	0.713245		AQHD	1.771	-7.24	524	540	0.340132
AQHE	1.517	-5.01	537	468	0.398283		AQHE	1.729	-7.23	537	522	0.533407
AQHF	2.059	0.33	556	363	0.833215		AQHF	1.86	-1.89	556	660	0.417448
AQHG	1.733	-2.53	466	472	0.631768		AQHG	1.245	-4.75	466	312	0.525037
AQHH	2.019	-1.49	546	660	0.53494		AQHH	1.196	-5.93	546	143	0.332689
AQHI	1.937	-0.26	522	540	0.44369		AQHI	1.703	-2.48	522	522	0.586235
AQHK	1.862	-4.18	537	600	0.78582		AQHK	1.255	-6.4	537	190	0.648894
AQHL	2.009	-0.13	522	540	0.508121		AQHL	1.569	-2.35	522	333	0.736491
AQHN	1.745	-2.23	523	279	0.707119		AQHN	1.369	-4.45	523	405	0.65136
AQHQ	1.585	-2.15	538	405	0.747335		AQHQ	1.228	-4.37	538	252	0.679956
AQHR	1.772	-3.19	565	600	0.613322		AQHR	1.27	-5.41	565	180	0.227691
AQHT	2.074	-1.63	510	540	0.654139		AQHT	1.721	-3.85	510	531	0.73973
AQHV	1.928	-0.92	508	441	0.769477		AQHV	1.645	-3.14	508	531	0.583767
AQHY	2.203	-0.67	572	660	0.708314		AQHY	1.923	-2.89	572	660	0.444811
AQIH	1.979	-0.26	522	540	0.814252		AQIH	1.664	-2.48	522	540	0.393651
AQKH	1.724	-4.18	537	590	0.406378		AQKH	1.207	-6.4	537	230	0.323764
AQLH	1.968	-0.13	522	540	0.830074		AQLH	1.537	-2.35	522	531	0.382455
AQNH	1.935	-2.23	523	540	0.62303		AQNH	1.318	-4.45	523	315	0.655409
AQQH	1.857	-2.15	538	504	0.9114		AQQH	1.262	-4.37	538	288	0.380617
AQRH	1.661	-3.19	565	600	0.152711		AQRH	1.204	-5.41	565	140	0.530005
AQTH	1.926	-1.63	510	540	0.706639		AQTH	1.673	-3.85	510	540	0.568233
AQVH	1.779	-0.92	508	315	0.79027		AQVH	1.652	-3.14	508	531	0.39591
AQYH	2.127	-0.67	572	660	0.629234		AQYH	1.742	-2.89	572	638	0.330669
ARAH	1.721	-2.92	507	540	0.40905		ARAH	1.226	-5.14	507	135	0.438842
ARDH	1.926	-6.06	551	600	0.356527		ARDH	1.567	-8.28	551	410	0.218723
AREH	2.05	-6.05	564	600	0.622341		AREH	1.651	-8.27	564	580	0.364299
ARFH	2.066	-0.71	583	720	0.509879		ARFH	1.676	-2.93	583	456	0.755343
ARGH	1.779	-3.57	493	540	0.75009		ARGH	1.323	-5.79	493	261	0.365804
ARHA	1.677	-2.92	507	540	0.422068		ARHA	1.123	-5.14	507	126	0.60764
ARHD	1.98	-6.06	551	600	0.480611		ARHD	1.605	-8.28	551	570	0.428977
ARHE	1.91	-6.05	564	600	0.659218		ARHE	1.499	-8.27	564	600	0.329714
ARHF	2.162	-0.71	583	720	0.359019		ARHF	1.665	-2.93	583	588	0.289815
ARHG	1.793	-3.57	493	540	0.669467		ARHG	1.255	-5.79	493	225	0.464362
ARHH	1.905	-2.53	573	372	0.764246		ARHH	1.181	-6.97	573	132	0.400545
ARHI	1.791	-1.3	549	530	0.686238		ARHI	1.466	-3.52	549	560	0.231857
ARHK	1.561	-5.22	564	638	0.663378		ARHK	1.164	-7.44	564	88	0.203625
ARHL	1.874	-1.17	549	440	0.813712		ARHL	1.486	-3.39	549	590	0.206686
ARHN	1.752	-3.27	550	540	0.554078		ARHN	1.301	-5.49	550	230	0.617872
ARHQ	1.677	-3.19	565	590	0.558178		ARHQ	1.175	-5.41	565	170	0.736023
ARHR	1.524	-4.23	592	660	0.0945204		ARHR	1.192	-6.45	592	99	0.237208
ARHT	1.896	-2.67	537	600	0.613617		ARHT	1.451	-4.89	537	560	0.240575
ARHV	1.985	-1.96	535	600	0.731289		ARHV	1.485	-4.18	535	340	0.26618
ARHY	1.905	-1.71	599	528	0.590721		ARHY	1.657	-3.93	599	708	0.384305
ARIH	1.955	-1.3	549	600	0.724033		ARIH	1.453	-3.52	549	590	0.512995
ARKH	1.471	-5.22	564	638	0.313172		ARKH	1.139	-7.44	564	110	0.209173
ARLH	1.832	-1.17	549	590	0.693159		ARLH	1.485	-3.39	549	590	0.179453
ARNH	1.814	-3.27	550	590	0.549685		ARNH	1.313	-5.49	550	480	0.595377
ARQH	1.727	-3.19	565	600	0.500785		ARQH	1.265	-5.41	565	250	0.170007
ARRH	1.49	-4.23	592	495	0.516167		ARRH	1.153	-6.45	592	176	0.640454
ARTH	1.95	-2.67	537	600	0.370951		ARTH	1.44	-4.89	537	570	0.43742
ARVH	1.943	-1.96	535	600	0.665119		ARVH	1.433	-4.18	535	430	0.217097
ARYH	2.009	-1.71	599	720	0.465708		ARYH	1.69	-3.93	599	720	0.36572
ATAH	2.005	-1.36	452	472	0.753506		ATAH	1.663	-3.58	452	472	0.753233
ATDH	1.858	-4.5	496	540	0.709615		ATDH	1.936	-6.72	496	540	0.274059
ATEH	1.722	-4.49	509	369	0.556956		ATEH	1.889	-6.71	509	540	0.379435
ATFH	2.014	0.85	528	407	0.673815		ATFH	1.983	-1.37	528	660	0.482881
ATGH	1.969	-2.01	438	472	0.681866		ATGH	1.569	-4.23	438	256	0.588783
ATHA	1.835	-1.36	452	472	0.794281		ATHA	1.63	-3.58	452	464	0.706573
ATHD	1.899	-4.5	496	540	0.790893		ATHD	2.019	-6.72	496	540	0.675039
ATHE	1.813	-4.49	509	531	0.764036		ATHE	1.787	-6.71	509	513	0.384461
ATHF	2.366	0.85	528	660	0.564351		ATHF	2.047	-1.37	528	660	0.453735
ATHG	1.949	-2.01	438	480	0.725218		ATHG	1.699	-4.23	438	472	0.766306
ATHH	2.028	-0.97	518	506	0.575911		ATHH	1.439	-5.41	518	242	0.266354
ATHI	2.098	0.26	494	540	0.857003		ATHI	1.882	-1.96	494	540	0.645872
ATHK	1.931	-3.66	509	600	0.557831		ATHK	1.482	-5.88	509	410	0.614806
ATHL	2.061	0.39	494	540	0.86852		ATHL	1.791	-1.83	494	540	0.486204
ATHN	2.155	-1.71	495	540	0.786782		ATHN	1.779	-3.93	495	531	0.554947
ATHQ	2.001	-1.63	510	531	0.732289		ATHQ	1.556	-3.85	510	531	0.811578
ATHR	1.962	-2.67	537	600	0.691765		ATHR	1.395	-4.89	537	300	0.481888
ATHT	2.141	-1.11	482	540	0.412536		ATHT	1.813	-3.33	482	540	0.482275
ATHV	2.123	-0.4	480	531	0.861384		ATHV	1.87	-2.62	480	540	0.567147
ATHY	2.336	-0.15	544	660	0.606874		ATHY	2.04	-2.37	544	660	0.342206
ATIH	1.818	0.26	494	306	0.679753		ATIH	1.831	-1.96	494	540	0.600746
ATKH	1.799	-3.66	509	500	0.393307		ATKH	1.46	-5.88	509	580	0.359194
ATLH	1.997	0.39	494	540	0.839404		ATLH	1.824	-1.83	494	531	0.818677
ATNH	1.998	-1.71	495	540	0.562696		ATNH	1.792	-3.93	495	531	0.742844
ATQH	2.004	-1.63	510	531	0.768905		ATQH	1.738	-3.85	510	540	0.355062
ATRH	1.815	-2.67	537	430	0.436424		ATRH	1.49	-4.89	537	590	0.252134
ATTH	1.992	-1.11	482	540	0.587877		ATTH	1.899	-3.33	482	540	0.488718
ATVH	2.079	-0.4	480	540	0.605705		ATVH	1.751	-2.62	480	540	0.596128
ATYH	2.319	-0.15	544	660	0.896719		ATYH	1.992	-2.37	544	660	0.477434
AVAH	1.862	-0.65	450	480	0.890402		AVAH	1.636	-2.87	450	480	0.770362
AVDH	1.853	-3.79	494	540	0.671217		AVDH	2.01	-6.01	494	540	0.364752
AVEH	1.805	-3.78	507	540	0.581539		AVEH	1.821	-6	507	423	0.606551
AVFH	2.357	1.56	526	660	0.726936		AVFH	1.965	-0.66	526	660	0.42129
AVGH	2.004	-1.3	436	480	0.886126		AVGH	1.712	-3.52	436	480	0.720163
AVHA	1.834	-0.65	450	472	0.839922		AVHA	1.573	-2.87	450	392	0.781698
AVHD	1.749	-3.79	494	306	0.585883		AVHD	1.937	-6.01	494	540	0.570608
AVHE	1.846	-3.78	507	540	0.458755		AVHE	1.922	-6	507	540	0.616121
AVHF	2.413	1.56	526	660	0.765988		AVHF	1.976	-0.66	526	660	0.278587
AVHG	1.903	-1.3	436	480	0.913835		AVHG	1.6	-3.52	436	472	0.461453
AVHH	2.069	-0.26	516	660	0.267123		AVHH	1.442	-4.7	516	297	0.551435
AVHI	2.045	0.97	492	540	0.822719		AVHI	1.789	-1.25	492	540	0.31866
AVHK	1.934	-2.95	507	600	0.601092		AVHK	1.486	-5.17	507	390	0.388306
AVHL	2.02	1.1	492	540	0.800868		AVHL	1.796	-1.12	492	540	0.566041
AVHN	2.052	-1	493	540	0.640223		AVHN	1.642	-3.22	493	387	0.513973
AVHQ	1.827	-0.92	508	540	0.662068		AVHQ	1.636	-3.14	508	540	0.609609
AVHR	1.895	-1.96	535	600	0.535995		AVHR	1.507	-4.18	535	230	0.736015
AVHT	2.157	-0.4	480	540	0.80029		AVHT	1.788	-2.62	480	486	0.744871
AVHV	2.124	0.31	478	540	0.888018		AVHV	1.87	-1.91	478	531	0.830654
AVHY	2.344	0.56	542	660	0.778627		AVHY	1.789	-1.66	542	385	0.306147
AVIH	2.049	0.97	492	540	0.850667		AVIH	1.758	-1.25	492	540	0.776606
AVKH	1.952	-2.95	507	600	0.81669		AVKH	1.485	-5.17	507	430	0.534567
AVLH	1.969	1.1	492	540	0.868772		AVLH	1.721	-1.12	492	540	0.597284
AVNH	1.997	-1	493	540	0.891151		AVNH	1.628	-3.22	493	468	0.749643
AVQH	1.99	-0.92	508	540	0.732199		AVQH	1.769	-3.14	508	531	0.569908
AVRH	1.905	-1.96	535	540	0.623365		AVRH	1.52	-4.18	535	330	0.63909
AVTH	2.113	-0.4	480	540	0.709403		AVTH	1.814	-2.62	480	540	0.604273
AVVH	1.999	0.31	478	540	0.793885		AVVH	1.901	-1.91	478	540	0.837004
AVYH	2.109	0.56	542	539	0.781092		AVYH	1.847	-1.66	542	528	0.742374
AYAH	1.772	-0.4	514	520	0.349205		AYAH	1.639	-2.62	514	570	0.700834
AYDH	1.806	-3.54	558	616	0.611905		AYDH	1.912	-5.76	558	660	0.325644
AYEH	1.829	-3.53	571	660	0.464336		AYEH	1.803	-5.75	571	407	0.778991
AYFH	2.299	1.81	590	780	0.452552		AYFH	1.865	-0.41	590	559	0.823754
AYGH	1.987	-1.05	500	600	0.74472		AYGH	1.612	-3.27	500	420	0.886778
AYHA	2.071	-0.4	514	600	0.752573		AYHA	1.748	-2.62	514	530	0.359469
AYHD	2.037	-3.54	558	660	0.612708		AYHD	1.964	-5.76	558	649	0.331656
AYHE	1.782	-3.53	571	506	0.692256		AYHE	1.987	-5.75	571	660	0.785526
AYHF	2.471	1.81	590	780	0.75142		AYHF	2.195	-0.41	590	780	0.469684
AYHG	2.162	-1.05	500	600	0.82576		AYHG	1.8	-3.27	500	600	0.335688
AYHH	2.32	-0.01	580	780	0.475837		AYHH	1.539	-4.45	580	260	0.543513
AYHI	2.205	1.22	556	660	0.766063		AYHI	1.899	-1	556	660	0.396974
AYHK	2.155	-2.7	571	720	0.670044		AYHK	1.735	-4.92	571	720	0.226688
AYHL	2.244	1.35	556	660	0.77674		AYHL	1.955	-0.87	556	660	0.791409
AYHN	2.162	-0.75	557	649	0.745267		AYHN	1.844	-2.97	557	396	0.728321
AYHQ	1.776	-0.67	572	341	0.876919		AYHQ	1.834	-2.89	572	649	0.388769
AYHR	2.125	-1.71	599	720	0.579632		AYHR	1.649	-3.93	599	384	0.60284
AYHT	2.301	-0.15	544	660	0.555214		AYHT	2.037	-2.37	544	660	0.554582
AYHV	2.241	0.56	542	660	0.796306		AYHV	2.017	-1.66	542	660	0.454644
AYHY	2.157	0.81	606	507	0.792262		AYHY	1.822	-1.41	606	481	0.799834
AYIH	1.868	1.22	556	660	0.328716		AYIH	1.885	-1	556	649	0.614369
AYKH	1.947	-2.7	571	720	0.570217		AYKH	1.577	-4.92	571	384	0.751674
AYLH	2.166	1.35	556	660	0.907598		AYLH	1.636	-0.87	556	352	0.683674
AYNH	2.001	-0.75	557	473	0.635856		AYNH	1.806	-2.97	557	638	0.640839
AYQH	2.13	-0.67	572	660	0.860251		AYQH	1.652	-2.89	572	649	0.449936
AYRH	2.019	-1.71	599	720	0.492512		AYRH	1.641	-3.93	599	720	0.491894
AYTH	2.03	-0.15	544	660	0.64031		AYTH	1.938	-2.37	544	660	0.462664
AYVH	2.195	0.56	542	660	0.865445		AYVH	1.844	-1.66	542	660	0.571362
AYYH	2.351	0.81	606	780	0.825334		AYYH	1.966	-1.41	606	702	0.450499
DAAH	1.776	-4.75	466	480	0.615891		DAAH	1.863	-6.97	466	472	0.707564
DADH	1.542	-7.89	510	540	0.399635		DADH	1.624	-10.11	510	306	0.705817
DAEH	1.448	-7.88	523	513	0.363983		DAEH	1.764	-10.1	523	540	0.623157
DAFH	2.052	-2.54	542	660	0.472095		DAFH	2.085	-4.76	542	660	0.508592
DAGH	1.645	-5.4	452	416	0.7139		DAGH	1.916	-7.62	452	480	0.702536
DAHA	1.75	-4.75	466	472	0.681634		DAHA	1.687	-6.97	466	480	0.462248
DAHD	1.381	-7.89	510	486	0.335711		DAHD	1.62	-10.11	510	513	0.781943
DAHE	1.38	-7.88	523	486	0.274857		DAHE	1.579	-10.1	523	531	0.513438
DAHF	2.134	-2.54	542	660	0.789802		DAHF	2.131	-4.76	542	660	0.53015
DAHG	1.619	-5.4	452	464	0.603267		DAHG	1.767	-7.62	452	472	0.455636
DAHH	2.007	-4.36	532	660	0.398931		DAHH	1.833	-8.8	532	660	0.632077
DAHI	1.756	-3.13	508	324	0.908702		DAHI	1.872	-5.35	508	540	0.460925
DAHK	2.079	-7.05	523	600	0.770834		DAHK	1.743	-9.27	523	590	0.447336
DAHL	1.772	-3	508	540	0.517367		DAHL	1.897	-5.22	508	540	0.487856
DAHN	1.972	-5.1	509	540	0.793988		DAHN	1.901	-7.32	509	531	0.731189
DAHQ	1.592	-5.02	524	522	0.903474		DAHQ	1.8	-7.24	524	531	0.766782
DAHR	2.001	-6.06	551	600	0.560843		DAHR	1.866	-8.28	551	590	0.791841
DAHT	1.917	-4.5	496	540	0.763867		DAHT	1.831	-6.72	496	432	0.70125
DAHV	1.856	-3.79	494	540	0.492924		DAHV	1.729	-6.01	494	288	0.662143
DAHY	2.186	-3.54	558	660	0.667278		DAHY	1.945	-5.76	558	440	0.604903
DAIH	1.902	-3.13	508	540	0.710768		DAIH	2.01	-5.35	508	540	0.474355
DAKH	2.111	-7.05	523	600	0.568835		DAKH	1.813	-9.27	523	600	0.315577
DALH	1.756	-3	508	540	0.536126		DALH	1.829	-5.22	508	531	0.385513
DANH	1.821	-5.1	509	540	0.454316		DANH	2.036	-7.32	509	540	0.469616
DAQH	1.71	-5.02	524	522	0.822065		DAQH	1.863	-7.24	524	531	0.857968
DARH	2.138	-6.06	551	600	0.579997		DARH	1.641	-8.28	551	480	0.367696
DATH	1.921	-4.5	496	540	0.531698		DATH	1.974	-6.72	496	540	0.386064
DAVH	1.953	-3.79	494	540	0.796555		DAVH	2.07	-6.01	494	540	0.614658
DAYH	1.965	-3.54	558	660	0.452174		DAYH	2.041	-5.76	558	660	0.350866
DDAH	1.489	-7.89	510	540	0.682372		DDAH	1.73	-10.11	510	531	0.427873
DDDH	1.331	-11.03	554	500	0.556838		DDDH	1.523	-13.25	554	590	0.550962
DDEH	1.294	-11.02	567	490	0.138997		DDEH	1.499	-13.24	567	590	0.364115
DDFH	1.88	-5.68	586	576	0.292034		DDFH	2.001	-7.9	586	720	0.114584
DDGH	1.643	-8.54	496	540	0.636855		DDGH	1.812	-10.76	496	540	0.592027
DDHA	1.439	-7.89	510	513	0.489868		DDHA	1.514	-10.11	510	540	0.286497
DDHD	1.366	-11.03	554	510	0.52483		DDHD	1.538	-13.25	554	590	0.189304
DDHE	1.2	-11.02	567	160	0.416481		DDHE	1.437	-13.24	567	570	0.256665
DDHF	1.95	-5.68	586	708	0.311218		DDHF	2.041	-7.9	586	720	0.261853
DDHG	1.572	-8.54	496	513	0.427205		DDHG	1.722	-10.76	496	540	0.677628
DDHH	1.784	-7.5	576	720	0.73551		DDHH	1.946	-11.94	576	720	0.183904
DDHI	1.781	-6.27	552	600	0.335796		DDHI	1.91	-8.49	552	600	0.597793
DDHK	1.888	-10.19	567	660	0.45568		DDHK	1.983	-12.41	567	660	0.144877
DDHL	1.76	-6.14	552	600	0.343585		DDHL	1.931	-8.36	552	600	0.405498
DDHN	1.663	-8.24	553	590	0.516964		DDHN	1.827	-10.46	553	600	0.620112
DDHQ	1.484	-8.16	568	590	0.566954		DDHQ	1.686	-10.38	568	470	0.744677
DDHR	1.993	-9.2	595	660	0.445023		DDHR	2.009	-11.42	595	660	0.241248
DDHT	1.733	-7.64	540	600	0.332291		DDHT	1.924	-9.86	540	600	0.253159
DDHV	1.781	-6.93	538	600	0.399106		DDHV	1.801	-9.15	538	420	0.669732
DDHY	1.909	-6.68	602	720	0.231506		DDHY	2	-8.9	602	720	0.217931
DDIH	1.7	-6.27	552	600	0.60377		DDIH	1.849	-8.49	552	600	0.624932
DDKH	1.913	-10.19	567	660	0.42615		DDKH	1.9	-12.41	567	660	0.145497
DDLH	1.653	-6.14	552	600	0.47432		DDLH	1.809	-8.36	552	590	0.250344
DDNH	1.668	-8.24	553	570	0.353735		DDNH	1.744	-10.46	553	480	0.265111
DDQH	1.524	-8.16	568	590	0.592573		DDQH	1.842	-10.38	568	600	0.626199
DDRH	2.005	-9.2	595	660	0.637052		DDRH	1.991	-11.42	595	660	0.379374
DDTH	1.636	-7.64	540	580	0.456789		DDTH	1.83	-9.86	540	600	0.388994
DDVH	1.772	-6.93	538	600	0.69257		DDVH	1.783	-9.15	538	500	0.574412
DDYH	1.724	-6.68	602	720	0.579303		DDYH	1.984	-8.9	602	720	0.275754
DEAH	1.433	-7.88	523	468	0.34992		DEAH	1.677	-10.1	523	540	0.705733
DEDH	1.392	-11.02	567	550	0.199036		DEDH	1.551	-13.24	567	500	0.308342
DEEH	1.249	-11.01	580	290	0.603303		DEEH	1.443	-13.23	580	550	0.247268
DEFH	1.857	-5.67	599	720	0.36507		DEFH	2.063	-7.89	599	720	0.374675
DEGH	1.679	-8.53	509	540	0.488567		DEGH	1.806	-10.75	509	540	0.376514
DEHA	1.345	-7.88	523	288	0.649527		DEHA	1.593	-10.1	523	540	0.361579
DEHD	1.26	-11.02	567	220	0.370506		DEHD	1.537	-13.24	567	530	0.332469
DEHE	1.238	-11.01	580	170	0.245642		DEHE	1.362	-13.23	580	310	0.515769
DEHF	2.013	-5.67	599	720	0.567748		DEHF	2.033	-7.89	599	720	0.602069
DEHG	1.416	-8.53	509	360	0.522627		DEHG	1.731	-10.75	509	540	0.516424
DEHH	1.702	-7.49	589	720	0.547166		DEHH	1.968	-11.93	589	720	0.415872
DEHI	1.77	-6.26	565	600	0.34383		DEHI	1.86	-8.48	565	600	0.385148
DEHK	1.984	-10.18	580	660	0.675435		DEHK	1.905	-12.4	580	660	0.792503
DEHL	1.736	-6.13	565	600	0.292301		DEHL	1.903	-8.35	565	600	0.588928
DEHN	1.642	-8.23	566	570	0.356327		DEHN	1.746	-10.45	566	490	0.226612
DEHQ	1.441	-8.15	581	560	0.492703		DEHQ	1.646	-10.37	581	600	0.318383
DEHR	1.833	-9.19	608	660	0.211216		DEHR	1.857	-11.41	608	462	0.424533
DEHT	1.721	-7.63	553	590	0.348562		DEHT	1.925	-9.85	553	600	0.31952
DEHV	1.74	-6.92	551	600	0.534285		DEHV	1.835	-9.14	551	350	0.789891
DEHY	1.927	-6.67	615	720	0.505742		DEHY	1.987	-8.89	615	720	0.227074
DEIH	1.612	-6.26	565	590	0.547092		DEIH	1.826	-8.48	565	600	0.210673
DEKH	2.009	-10.18	580	660	0.395599		DEKH	1.871	-12.4	580	660	0.683013
DELH	1.667	-6.13	565	600	0.556055		DELH	1.823	-8.35	565	600	0.541632
DENH	1.613	-8.23	566	600	0.250431		DENH	1.715	-10.45	566	600	0.229183
DEQH	1.541	-8.15	581	580	0.498726		DEQH	1.845	-10.37	581	600	0.428572
DERH	1.977	-9.19	608	660	0.441884		DERH	1.93	-11.41	608	660	0.234468
DETH	1.636	-7.63	553	600	0.224772		DETH	1.881	-9.85	553	600	0.447009
DEVH	1.646	-6.92	551	600	0.434232		DEVH	1.823	-9.14	551	600	0.7145
DEYH	1.785	-6.67	615	720	0.230497		DEYH	1.893	-8.89	615	720	0.206834
DFAH	1.89	-2.54	542	440	0.631962		DFAH	2.018	-4.76	542	660	0.351067
DFDH	1.731	-5.68	586	720	0.430904		DFDH	2.014	-7.9	586	720	0.288647
DFEH	1.739	-5.67	599	516	0.365218		DFEH	1.894	-7.89	599	720	0.624936
DFFH	2.046	-0.33	618	630	0.47326		DFFH	2.163	-2.55	618	840	0.27355
DFGH	2.079	-3.19	528	660	0.693929		DFGH	1.943	-5.41	528	396	0.488681
DFHA	1.992	-2.54	542	660	0.299942		DFHA	1.935	-4.76	542	660	0.306189
DFHD	1.697	-5.68	586	720	0.681714		DFHD	1.825	-7.9	586	624	0.117806
DFHE	1.756	-5.67	599	720	0.292534		DFHE	1.799	-7.89	599	720	0.240765
DFHF	2.226	-0.33	618	700	0.542202		DFHF	2.383	-2.55	618	840	0.452073
DFHG	2.029	-3.19	528	660	0.42989		DFHG	2.219	-5.41	528	660	0.52478
DFHH	2.033	-2.15	608	700	0.702096		DFHH	1.938	-6.59	608	840	0.389419
DFHI	2.085	-0.92	584	720	0.610754		DFHI	2.288	-3.14	584	720	0.471104
DFHK	2.313	-4.84	599	780	0.478708		DFHK	2.015	-7.06	599	780	0.386431
DFHL	2.015	-0.79	584	540	0.608925		DFHL	2.204	-3.01	584	720	0.662744
DFHN	2.076	-2.89	585	720	0.659172		DFHN	1.996	-5.11	585	456	0.632589
DFHQ	1.887	-2.81	600	720	0.367806		DFHQ	2.048	-5.03	600	720	0.321536
DFHR	2.238	-3.85	627	780	0.449619		DFHR	1.96	-6.07	627	546	0.632096
DFHT	2.231	-2.29	572	720	0.622949		DFHT	2.063	-4.51	572	396	0.504933
DFHV	2.121	-1.58	570	720	0.462558		DFHV	2.082	-3.8	570	696	0.38813
DFHY	2.218	-1.33	634	840	0.56942		DFHY	2.105	-3.55	634	574	0.606826
DFIH	2.005	-0.92	584	720	0.531959		DFIH	1.959	-3.14	584	600	0.450568
DFKH	2.175	-4.84	599	780	0.38516		DFKH	1.827	-7.06	599	520	0.715614
DFLH	2.056	-0.79	584	720	0.615607		DFLH	2.149	-3.01	584	720	0.393104
DFNH	2.035	-2.89	585	720	0.550876		DFNH	2.116	-5.11	585	720	0.414418
DFQH	2.033	-2.81	600	720	0.468955		DFQH	2.042	-5.03	600	720	0.382177
DFRH	2.017	-3.85	627	507	0.504131		DFRH	2.001	-6.07	627	780	0.297539
DFTH	1.937	-2.29	572	564	0.572532		DFTH	2.103	-4.51	572	720	0.414624
DFVH	2.027	-1.58	570	720	0.370736		DFVH	2.047	-3.8	570	720	0.480036
DFYH	2.181	-1.33	634	840	0.282193		DFYH	2.051	-3.55	634	714	0.281604
DGAH	1.868	-5.4	452	480	0.648864		DGAH	1.897	-7.62	452	480	0.516278
DGDH	1.586	-8.54	496	540	0.571062		DGDH	1.772	-10.76	496	540	0.274469
DGEH	1.563	-8.53	509	540	0.558835		DGEH	1.767	-10.75	509	414	0.492192
DGFH	2.112	-3.19	528	660	0.60294		DGFH	2.082	-5.41	528	660	0.567863
DGGH	1.822	-6.05	438	480	0.403112		DGGH	1.938	-8.27	438	480	0.383619
DGHA	1.697	-5.4	452	472	0.800458		DGHA	1.772	-7.62	452	472	0.82819
DGHD	1.492	-8.54	496	531	0.807412		DGHD	1.816	-10.76	496	531	0.66551
DGHE	1.456	-8.53	509	513	0.469274		DGHE	1.72	-10.75	509	531	0.450056
DGHF	2.177	-3.19	528	660	0.702334		DGHF	1.964	-5.41	528	473	0.642287
DGHG	1.714	-6.05	438	480	0.586449		DGHG	1.784	-8.27	438	464	0.645324
DGHH	1.968	-5.01	518	572	0.71692		DGHH	1.738	-9.45	518	341	0.35871
DGHI	1.893	-3.78	494	540	0.670316		DGHI	2.011	-6	494	540	0.689917
DGHK	2.128	-7.7	509	600	0.733848		DGHK	1.87	-9.92	509	590	0.702798
DGHL	1.913	-3.65	494	540	0.597044		DGHL	1.67	-5.87	494	288	0.767208
DGHN	1.783	-5.75	495	540	0.744629		DGHN	1.851	-7.97	495	531	0.398868
DGHQ	1.742	-5.67	510	522	0.782697		DGHQ	1.74	-7.89	510	531	0.774901
DGHR	2.105	-6.71	537	600	0.628364		DGHR	1.722	-8.93	537	340	0.85521
DGHT	1.941	-5.15	482	540	0.565704		DGHT	2.059	-7.37	482	540	0.51261
DGHV	1.881	-4.44	480	540	0.603054		DGHV	1.958	-6.66	480	540	0.560544
DGHY	2.028	-4.19	544	660	0.460354		DGHY	2.06	-6.41	544	649	0.374742
DGIH	1.736	-3.78	494	540	0.12829		DGIH	1.991	-6	494	540	0.559311
DGKH	2.126	-7.7	509	600	0.480109		DGKH	1.717	-9.92	509	360	0.824687
DGLH	1.932	-3.65	494	540	0.741958		DGLH	2.058	-5.87	494	540	0.594034
DGNH	1.886	-5.75	495	540	0.467538		DGNH	1.833	-7.97	495	324	0.619344
DGQH	1.82	-5.67	510	531	0.66132		DGQH	1.852	-7.89	510	540	0.597452
DGRH	2.089	-6.71	537	600	0.659176		DGRH	1.72	-8.93	537	360	0.7647
DGTH	1.748	-5.15	482	432	0.381833		DGTH	2.047	-7.37	482	540	0.354906
DGVH	2.033	-4.44	480	540	0.65735		DGVH	1.862	-6.66	480	288	0.76524
DGYH	2.063	-4.19	544	660	0.607755		DGYH	1.934	-6.41	544	440	0.784217
DHAA	1.675	-4.75	466	464	0.509531		DHAA	1.768	-6.97	466	480	0.56373
DHAD	1.426	-7.89	510	522	0.350583		DHAD	1.661	-10.11	510	540	0.510418
DHAE	1.302	-7.88	523	342	0.296037		DHAE	1.513	-10.1	523	540	0.364107
DHAF	2.041	-2.54	542	660	0.412669		DHAF	1.977	-4.76	542	660	0.362586
DHAG	1.711	-5.4	452	480	0.667125		DHAG	1.731	-7.62	452	480	0.785777
DHAH	1.994	-4.36	532	660	0.616156		DHAH	1.626	-8.8	532	649	0.300461
DHAI	1.881	-3.13	508	540	0.596947		DHAI	1.92	-5.35	508	540	0.802729
DHAK	2.069	-7.05	523	600	0.7358		DHAK	1.808	-9.27	523	590	0.677155
DHAL	1.937	-3	508	540	0.743716		DHAL	1.854	-5.22	508	540	0.781864
DHAN	1.879	-5.1	509	540	0.84596		DHAN	1.856	-7.32	509	540	0.618205
DHAQ	1.654	-5.02	524	540	0.544642		DHAQ	1.755	-7.24	524	531	0.787861
DHAR	2.078	-6.06	551	600	0.710135		DHAR	1.732	-8.28	551	590	0.251061
DHAT	1.875	-4.5	496	540	0.727996		DHAT	1.812	-6.72	496	441	0.698073
DHAV	1.871	-3.79	494	540	0.359326		DHAV	1.801	-6.01	494	432	0.732033
DHAY	2.031	-3.54	558	660	0.63906		DHAY	2.166	-5.76	558	660	0.482078
DHDA	1.316	-7.89	510	423	0.399591		DHDA	1.598	-10.11	510	513	0.598971
DHDD	1.255	-11.03	554	260	0.402754		DHDD	1.509	-13.25	554	600	0.311376
DHDE	1.278	-11.02	567	420	0.85116		DHDE	1.471	-13.24	567	590	0.684062
DHDF	1.789	-5.68	586	648	0.313466		DHDF	1.73	-7.9	586	636	0.42511
DHDG	1.536	-8.54	496	531	0.47754		DHDG	1.676	-10.76	496	288	0.578224
DHDH	1.649	-7.5	576	720	0.313485		DHDH	1.915	-11.94	576	720	0.353498
DHDI	1.642	-6.27	552	600	0.413636		DHDI	1.794	-8.49	552	600	0.426296
DHDK	1.852	-10.19	567	660	0.259648		DHDK	1.987	-12.41	567	660	0.462967
DHDL	1.631	-6.14	552	600	0.332947		DHDL	1.709	-8.36	552	420	0.508796
DHDN	1.511	-8.24	553	590	0.548654		DHDN	1.765	-10.46	553	570	0.594925
DHDQ	1.435	-8.16	568	530	0.333574		DHDQ	1.575	-10.38	568	560	0.205282
DHDR	2.012	-9.2	595	660	0.737099		DHDR	1.964	-11.42	595	660	0.561631
DHDT	1.621	-7.64	540	600	0.413686		DHDT	1.982	-9.86	540	600	0.573066
DHDV	1.711	-6.93	538	600	0.317801		DHDV	1.965	-9.15	538	600	0.458977
DHDY	1.737	-6.68	602	720	0.323209		DHDY	1.949	-8.9	602	720	0.389139
DHEA	1.312	-7.88	523	423	0.521268		DHEA	1.441	-10.1	523	441	0.661346
DHED	1.211	-11.02	567	150	0.242616		DHED	1.417	-13.24	567	550	0.403534
DHEE	1.221	-11.01	580	430	0.264131		DHEE	1.342	-13.23	580	520	0.796038
DHEF	1.737	-5.67	599	720	0.344116		DHEF	1.892	-7.89	599	720	0.323556
DHEG	1.454	-8.53	509	531	0.393398		DHEG	1.688	-10.75	509	531	0.367123
DHEH	1.591	-7.49	589	672	0.391649		DHEH	1.79	-11.93	589	528	0.541129
DHEI	1.553	-6.26	565	550	0.446823		DHEI	1.834	-8.48	565	600	0.494129
DHEK	1.983	-10.18	580	660	0.517823		DHEK	1.905	-12.4	580	660	0.411174
DHEL	1.599	-6.13	565	600	0.304442		DHEL	1.766	-8.35	565	600	0.219402
DHEN	1.601	-8.23	566	600	0.242384		DHEN	1.755	-10.45	566	570	0.117101
DHEQ	1.468	-8.15	581	600	0.328929		DHEQ	1.633	-10.37	581	590	0.663601
DHER	1.906	-9.19	608	660	0.30684		DHER	2.003	-11.41	608	660	0.467527
DHET	1.721	-7.63	553	600	0.698856		DHET	1.82	-9.85	553	580	0.449188
DHEV	1.615	-6.92	551	540	0.234458		DHEV	1.843	-9.14	551	600	0.441431
DHEY	1.759	-6.67	615	720	0.592033		DHEY	1.929	-8.89	615	720	0.531091
DHFA	2.141	-2.54	542	660	0.634133		DHFA	2.077	-4.76	542	660	0.297042
DHFD	1.637	-5.68	586	708	0.552426		DHFD	1.968	-7.9	586	720	0.303642
DHFE	1.671	-5.67	599	720	0.584752		DHFE	1.947	-7.89	599	720	0.296196
DHFF	2.331	-0.33	618	840	0.427852		DHFF	2.247	-2.55	618	840	0.311536
DHFG	2.039	-3.19	528	660	0.495913		DHFG	1.99	-5.41	528	539	0.370774
DHFH	2.048	-2.15	608	490	0.525478		DHFH	1.942	-6.59	608	840	0.135948
DHFI	2.158	-0.92	584	720	0.796755		DHFI	2.066	-3.14	584	720	0.336954
DHFK	2.085	-4.84	599	676	0.492708		DHFK	2.076	-7.06	599	780	0.631902
DHFL	2.217	-0.79	584	720	0.719417		DHFL	2.216	-3.01	584	720	0.484882
DHFN	2.002	-2.89	585	720	0.514602		DHFN	1.954	-5.11	585	564	0.626942
DHFQ	1.975	-2.81	600	720	0.41058		DHFQ	2.093	-5.03	600	720	0.395436
DHFR	2.241	-3.85	627	780	0.281546		DHFR	2.065	-6.07	627	780	0.573303
DHFT	2.154	-2.29	572	720	0.374019		DHFT	2.304	-4.51	572	720	0.751327
DHFV	2.195	-1.58	570	720	0.641345		DHFV	2.254	-3.8	570	720	0.542319
DHFY	2.282	-1.33	634	840	0.343239		DHFY	1.97	-3.55	634	448	0.662017
DHGA	1.775	-5.4	452	472	0.81374		DHGA	1.78	-7.62	452	480	0.670426
DHGD	1.519	-8.54	496	522	0.625845		DHGD	1.714	-10.76	496	531	0.78643
DHGE	1.533	-8.53	509	531	0.791132		DHGE	1.725	-10.75	509	540	0.571459
DHGF	1.834	-3.19	528	451	0.847901		DHGF	2.113	-5.41	528	660	0.60337
DHGG	1.723	-6.05	438	480	0.438289		DHGG	1.894	-8.27	438	480	0.629364
DHGH	1.745	-5.01	518	561	0.474977		DHGH	1.62	-9.45	518	429	0.540441
DHGI	1.757	-3.78	494	414	0.888576		DHGI	1.894	-6	494	540	0.834042
DHGK	1.997	-7.7	509	600	0.517435		DHGK	1.793	-9.92	509	600	0.467014
DHGL	1.769	-3.65	494	504	0.635685		DHGL	1.931	-5.87	494	540	0.826844
DHGN	1.857	-5.75	495	540	0.797132		DHGN	1.923	-7.97	495	540	0.566598
DHGQ	1.604	-5.67	510	531	0.529143		DHGQ	2.056	-7.89	510	540	0.731874
DHGR	2.051	-6.71	537	590	0.585256		DHGR	1.677	-8.93	537	400	0.570783
DHGT	1.888	-5.15	482	540	0.524481		DHGT	2.066	-7.37	482	540	0.822962
DHGV	1.91	-4.44	480	540	0.559105		DHGV	1.787	-6.66	480	423	0.665906
DHGY	2.127	-4.19	544	660	0.576144		DHGY	2.052	-6.41	544	660	0.352182
DHHA	1.939	-4.36	532	660	0.406496		DHHA	1.547	-8.8	532	616	0.100455
DHHD	1.645	-7.5	576	708	0.28517		DHHD	1.868	-11.94	576	720	0.164084
DHHE	1.553	-7.49	589	684	0.432282		DHHE	1.795	-11.93	589	720	0.186257
DHHF	2.323	-2.15	608	840	0.464283		DHHF	1.979	-6.59	608	840	0.413125
DHHG	1.921	-5.01	518	660	0.346726		DHHG	1.605	-9.45	518	473	0.225483
DHHH	2.085	-3.97	598	840	0.262777		DHHH	1.418	-10.63	598	364	0.471301
DHHI	2.158	-2.74	574	720	0.497607		DHHI	1.856	-7.18	574	720	0.33432
DHHK	2.236	-6.66	589	780	0.437686		DHHK	1.603	-11.1	589	780	0.653231
DHHL	2.133	-2.61	574	720	0.519352		DHHL	1.905	-7.05	574	720	0.376752
DHHN	2.069	-4.71	575	708	0.350786		DHHN	1.766	-9.15	575	720	0.205703
DHHQ	1.878	-4.63	590	720	0.596436		DHHQ	1.636	-9.07	590	660	0.469857
DHHR	2.342	-5.67	617	780	0.680177		DHHR	1.611	-10.11	617	663	0.272285
DHHT	2.146	-4.11	562	720	0.710867		DHHT	1.842	-8.55	562	720	0.439458
DHHV	2.221	-3.4	560	720	0.515402		DHHV	1.859	-7.84	560	720	0.133574
DHHY	2.157	-3.15	624	840	0.352954		DHHY	1.864	-7.59	624	840	0.149733
DHIA	1.816	-3.13	508	522	0.595951		DHIA	1.794	-5.35	508	540	0.562351
DHID	1.573	-6.27	552	600	0.581279		DHID	1.75	-8.49	552	600	0.397994
DHIE	1.501	-6.26	565	600	0.142843		DHIE	1.605	-8.48	565	370	0.662803
DHIF	2.257	-0.92	584	720	0.782161		DHIF	2.203	-3.14	584	720	0.377536
DHIG	1.858	-3.78	494	540	0.475802		DHIG	1.892	-6	494	540	0.841942
DHIH	1.921	-2.74	574	720	0.247335		DHIH	1.807	-7.18	574	600	0.548141
DHII	1.917	-1.51	550	600	0.735583		DHII	1.98	-3.73	550	600	0.654678
DHIK	1.99	-5.43	565	649	0.432831		DHIK	1.907	-7.65	565	660	0.470286
DHIL	1.76	-1.38	550	370	0.792059		DHIL	1.877	-3.6	550	600	0.775892
DHIN	1.953	-3.48	551	600	0.545382		DHIN	1.92	-5.7	551	600	0.505637
DHIQ	1.715	-3.4	566	600	0.692367		DHIQ	1.734	-5.62	566	590	0.480023
DHIR	1.939	-4.44	593	660	0.362578		DHIR	1.87	-6.66	593	660	0.32331
DHIT	2.02	-2.88	538	600	0.799569		DHIT	2.075	-5.1	538	600	0.543406
DHIV	2.008	-2.17	536	600	0.733966		DHIV	1.844	-4.39	536	380	0.760824
DHIY	2.169	-1.92	600	720	0.581817		DHIY	1.902	-4.14	600	588	0.273764
DHKA	1.907	-7.05	523	600	0.503453		DHKA	1.662	-9.27	523	580	0.405026
DHKD	1.982	-10.19	567	660	0.567688		DHKD	1.79	-12.41	567	660	0.55016
DHKE	1.877	-10.18	580	660	0.531966		DHKE	1.818	-12.4	580	660	0.333844
DHKF	2.228	-4.84	599	780	0.494639		DHKF	2.143	-7.06	599	780	0.681856
DHKG	1.958	-7.7	509	550	0.548525		DHKG	1.758	-9.92	509	600	0.590105
DHKH	2.066	-6.66	589	780	0.245984		DHKH	1.527	-11.1	589	780	0.408966
DHKI	2.132	-5.43	565	660	0.728458		DHKI	1.802	-7.65	565	605	0.396353
DHKK	1.953	-9.35	580	720	0.634051		DHKK	1.668	-11.57	580	720	0.604252
DHKL	2.068	-5.3	565	660	0.52406		DHKL	1.805	-7.52	565	660	0.446608
DHKN	2.098	-7.4	566	660	0.505698		DHKN	1.839	-9.62	566	660	0.532969
DHKQ	2.005	-7.32	581	660	0.691781		DHKQ	1.821	-9.54	581	660	0.405966
DHKR	1.981	-8.36	608	720	0.558713		DHKR	1.556	-10.58	608	708	0.377135
DHKT	2.109	-6.8	553	660	0.512473		DHKT	1.796	-9.02	553	660	0.712238
DHKV	2.245	-6.09	551	660	0.37595		DHKV	1.967	-8.31	551	660	0.413072
DHKY	2.068	-5.84	615	780	0.149365		DHKY	1.94	-8.06	615	416	0.477706
DHLA	1.824	-3	508	540	0.576738		DHLA	1.737	-5.22	508	531	0.656599
DHLD	1.539	-6.14	552	600	0.354542		DHLD	1.834	-8.36	552	600	0.394019
DHLE	1.464	-6.13	565	600	0.531811		DHLE	1.646	-8.35	565	420	0.72578
DHLF	2.113	-0.79	584	720	0.50932		DHLF	2.253	-3.01	584	720	0.533712
DHLG	1.793	-3.65	494	540	0.576335		DHLG	1.792	-5.87	494	540	0.353103
DHLH	1.936	-2.61	574	564	0.507324		DHLH	1.76	-7.05	574	372	0.509499
DHLI	1.942	-1.38	550	600	0.668405		DHLI	1.93	-3.6	550	600	0.686892
DHLK	1.886	-5.3	565	451	0.37022		DHLK	1.822	-7.52	565	660	0.759303
DHLL	1.873	-1.25	550	600	0.646252		DHLL	1.903	-3.47	550	600	0.777294
DHLN	1.736	-3.35	551	430	0.41696		DHLN	1.879	-5.57	551	590	0.620341
DHLQ	1.799	-3.27	566	600	0.745302		DHLQ	1.781	-5.49	566	590	0.380698
DHLR	1.935	-4.31	593	660	0.520558		DHLR	1.755	-6.53	593	561	0.409524
DHLT	1.95	-2.75	538	600	0.571454		DHLT	2.053	-4.97	538	600	0.617929
DHLV	1.94	-2.04	536	600	0.730342		DHLV	1.987	-4.26	536	600	0.609369
DHLY	2.011	-1.79	600	660	0.657312		DHLY	1.956	-4.01	600	372	0.836889
DHNA	1.702	-5.1	509	522	0.576325		DHNA	1.722	-7.32	509	540	0.236475
DHND	1.498	-8.24	553	550	0.289612		DHND	1.686	-10.46	553	600	0.117033
DHNE	1.483	-8.23	566	570	0.593726		DHNE	1.75	-10.45	566	600	0.398826
DHNF	1.989	-2.89	585	720	0.510224		DHNF	2.094	-5.11	585	720	0.426847
DHNG	1.795	-5.75	495	540	0.436499		DHNG	1.919	-7.97	495	540	0.680996
DHNH	1.853	-4.71	575	636	0.49049		DHNH	1.607	-9.15	575	516	0.586533
DHNI	1.945	-3.48	551	600	0.426858		DHNI	1.789	-5.7	551	340	0.665022
DHNK	1.976	-7.4	566	660	0.53183		DHNK	1.805	-9.62	566	638	0.449313
DHNL	1.979	-3.35	551	600	0.598003		DHNL	1.972	-5.57	551	600	0.530722
DHNN	1.993	-5.45	552	600	0.429471		DHNN	2.06	-7.67	552	600	0.315737
DHNQ	1.673	-5.37	567	600	0.4833		DHNQ	1.864	-7.59	567	600	0.342435
DHNR	2.036	-6.41	594	660	0.422138		DHNR	1.743	-8.63	594	649	0.516292
DHNT	2.034	-4.85	539	600	0.459141		DHNT	1.909	-7.07	539	400	0.566691
DHNV	1.993	-4.14	537	600	0.710074		DHNV	1.992	-6.36	537	540	0.829213
DHNY	1.972	-3.89	601	720	0.755809		DHNY	1.927	-6.11	601	384	0.655823
DHQA	1.537	-5.02	524	423	0.345139		DHQA	1.716	-7.24	524	522	0.317734
DHQD	1.486	-8.16	568	580	0.68474		DHQD	1.736	-10.38	568	600	0.558746
DHQE	1.393	-8.15	581	560	0.654024		DHQE	1.55	-10.37	581	590	0.410817
DHQF	1.887	-2.81	600	576	0.780375		DHQF	1.925	-5.03	600	408	0.563433
DHQG	1.595	-5.67	510	414	0.538275		DHQG	1.797	-7.89	510	522	0.329532
DHQH	1.789	-4.63	590	708	0.24978		DHQH	1.683	-9.07	590	720	0.505647
DHQI	1.709	-3.4	566	320	0.855489		DHQI	1.944	-5.62	566	600	0.696842
DHQK	1.914	-7.32	581	374	0.756387		DHQK	1.702	-9.54	581	660	0.251161
DHQL	1.867	-3.27	566	600	0.5058		DHQL	1.922	-5.49	566	600	0.536072
DHQN	1.747	-5.37	567	580	0.767162		DHQN	2.013	-7.59	567	600	0.596035
DHQQ	1.575	-5.29	582	590	0.558802		DHQQ	1.849	-7.51	582	600	0.849952
DHQR	2.117	-6.33	609	660	0.606895		DHQR	1.77	-8.55	609	638	0.413155
DHQT	1.949	-4.77	554	600	0.774562		DHQT	1.929	-6.99	554	600	0.562161
DHQV	1.946	-4.06	552	600	0.74484		DHQV	1.82	-6.28	552	600	0.472156
DHQY	1.926	-3.81	616	720	0.405691		DHQY	2.013	-6.03	616	720	0.403267
DHRA	1.965	-6.06	551	530	0.510214		DHRA	1.655	-8.28	551	590	0.518479
DHRD	1.817	-9.2	595	649	0.291671		DHRD	1.849	-11.42	595	660	0.269603
DHRE	1.824	-9.19	608	660	0.553024		DHRE	1.951	-11.41	608	660	0.547329
DHRF	2.337	-3.85	627	780	0.409168		DHRF	1.979	-6.07	627	780	0.267892
DHRG	1.835	-6.71	537	420	0.569675		DHRG	1.759	-8.93	537	600	0.300529
DHRH	2	-5.67	617	559	0.403758		DHRH	1.55	-10.11	617	429	0.208285
DHRI	1.923	-4.44	593	396	0.670011		DHRI	1.73	-6.66	593	418	0.552459
DHRK	1.968	-8.36	608	720	0.509124		DHRK	1.647	-10.58	608	720	0.459035
DHRL	1.959	-4.31	593	561	0.518813		DHRL	1.691	-6.53	593	374	0.509514
DHRN	2.144	-6.41	594	660	0.526454		DHRN	1.714	-8.63	594	539	0.384185
DHRQ	1.905	-6.33	609	660	0.397876		DHRQ	1.693	-8.55	609	660	0.449113
DHRR	1.856	-7.37	636	720	0.235629		DHRR	1.574	-9.59	636	720	0.634489
DHRT	2.161	-5.81	581	660	0.520111		DHRT	1.846	-8.03	581	660	0.230542
DHRV	1.995	-5.1	579	451	0.742045		DHRV	2	-7.32	579	660	0.408609
DHRY	2.126	-4.85	643	780	0.559899		DHRY	1.948	-7.07	643	780	0.294725
DHTA	1.847	-4.5	496	540	0.50354		DHTA	1.768	-6.72	496	423	0.61754
DHTD	1.617	-7.64	540	600	0.591134		DHTD	1.83	-9.86	540	600	0.420158
DHTE	1.497	-7.63	553	600	0.290501		DHTE	1.829	-9.85	553	600	0.315755
DHTF	1.869	-2.29	572	564	0.430359		DHTF	2.084	-4.51	572	720	0.663271
DHTG	1.826	-5.15	482	540	0.440107		DHTG	1.672	-7.37	482	396	0.550739
DHTH	1.861	-4.11	562	480	0.535485		DHTH	1.743	-8.55	562	708	0.430024
DHTI	2.025	-2.88	538	600	0.49685		DHTI	2.001	-5.1	538	600	0.564226
DHTK	2.178	-6.8	553	660	0.583614		DHTK	1.895	-9.02	553	660	0.445562
DHTL	1.961	-2.75	538	600	0.619962		DHTL	2.036	-4.97	538	600	0.724411
DHTN	1.878	-4.85	539	600	0.666575		DHTN	1.966	-7.07	539	600	0.554291
DHTQ	1.782	-4.77	554	590	0.520657		DHTQ	1.878	-6.99	554	600	0.36404
DHTR	2.154	-5.81	581	660	0.538329		DHTR	1.876	-8.03	581	660	0.389474
DHTT	1.928	-4.25	526	590	0.497812		DHTT	2.137	-6.47	526	600	0.551182
DHTV	2.018	-3.54	524	600	0.530286		DHTV	1.921	-5.76	524	520	0.692463
DHTY	2.019	-3.29	588	720	0.668101		DHTY	2.004	-5.51	588	372	0.550187
DHVA	1.895	-3.79	494	540	0.617529		DHVA	1.838	-6.01	494	540	0.40316
DHVD	1.583	-6.93	538	590	0.606125		DHVD	1.753	-9.15	538	580	0.360591
DHVE	1.512	-6.92	551	580	0.284888		DHVE	1.775	-9.14	551	600	0.706199
DHVF	2.141	-1.58	570	720	0.591526		DHVF	2.19	-3.8	570	720	0.519983
DHVG	1.896	-4.44	480	540	0.639851		DHVG	1.845	-6.66	480	513	0.648721
DHVH	2.079	-3.4	560	720	0.409685		DHVH	1.798	-7.84	560	720	0.190789
DHVI	2.015	-2.17	536	600	0.809056		DHVI	2.057	-4.39	536	600	0.570377
DHVK	2.092	-6.09	551	660	0.382183		DHVK	1.855	-8.31	551	660	0.381598
DHVL	1.922	-2.04	536	600	0.764943		DHVL	1.997	-4.26	536	600	0.820184
DHVN	1.9	-4.14	537	600	0.58325		DHVN	1.988	-6.36	537	600	0.593216
DHVQ	1.815	-4.06	552	600	0.86081		DHVQ	1.798	-6.28	552	600	0.533585
DHVR	2.211	-5.1	579	660	0.661237		DHVR	1.852	-7.32	579	638	0.587054
DHVT	1.877	-3.54	524	480	0.661627		DHVT	1.99	-5.76	524	600	0.385213
DHVV	1.946	-2.83	522	600	0.712826		DHVV	1.84	-5.05	522	310	0.778777
DHVY	2.073	-2.58	586	720	0.534623		DHVY	2.188	-4.8	586	720	0.447898
DHYA	2.038	-3.54	558	660	0.592328		DHYA	1.934	-5.76	558	583	0.772848
DHYD	1.663	-6.68	602	720	0.392418		DHYD	1.894	-8.9	602	720	0.655932
DHYE	1.685	-6.67	615	708	0.58443		DHYE	1.839	-8.89	615	720	0.196487
DHYF	2.238	-1.33	634	798	0.412333		DHYF	2.323	-3.55	634	840	0.304178
DHYG	2.035	-4.19	544	660	0.537486		DHYG	2.085	-6.41	544	660	0.577267
DHYH	2.033	-3.15	624	700	0.299095		DHYH	1.79	-7.59	624	616	0.179138
DHYI	2.14	-1.92	600	720	0.601049		DHYI	2.027	-4.14	600	648	0.45797
DHYK	2.028	-5.84	615	546	0.559886		DHYK	1.982	-8.06	615	780	0.320115
DHYL	2.191	-1.79	600	720	0.647653		DHYL	2.284	-4.01	600	720	0.60908
DHYN	2.086	-3.89	601	720	0.422829		DHYN	1.979	-6.11	601	528	0.315305
DHYQ	1.882	-3.81	616	720	0.711902		DHYQ	1.923	-6.03	616	720	0.338726
DHYR	2.2	-4.85	643	780	0.317212		DHYR	2.05	-7.07	643	780	0.301831
DHYT	2.081	-3.29	588	720	0.571242		DHYT	2.091	-5.51	588	720	0.44786
DHYV	2.182	-2.58	586	720	0.610639		DHYV	2.162	-4.8	586	720	0.54842
DHYY	2.153	-2.33	650	756	0.518362		DHYY	2.277	-4.55	650	840	0.194588
DIAH	1.922	-3.13	508	540	0.575816		DIAH	1.998	-5.35	508	540	0.661201
DIDH	1.65	-6.27	552	600	0.642457		DIDH	1.796	-8.49	552	340	0.721527
DIEH	1.688	-6.26	565	600	0.707213		DIEH	1.826	-8.48	565	600	0.505896
DIFH	2.176	-0.92	584	720	0.422167		DIFH	2.173	-3.14	584	720	0.546679
DIGH	1.983	-3.78	494	540	0.540644		DIGH	2.081	-6	494	540	0.633658
DIHA	1.83	-3.13	508	540	0.572451		DIHA	1.888	-5.35	508	540	0.42866
DIHD	1.62	-6.27	552	580	0.60502		DIHD	1.744	-8.49	552	600	0.549248
DIHE	1.544	-6.26	565	600	0.693781		DIHE	1.7	-8.48	565	590	0.305677
DIHF	2.206	-0.92	584	684	0.584046		DIHF	2.264	-3.14	584	720	0.487031
DIHG	1.801	-3.78	494	540	0.469911		DIHG	1.973	-6	494	540	0.538602
DIHH	2.173	-2.74	574	720	0.477597		DIHH	1.833	-7.18	574	504	0.351417
DIHI	1.946	-1.51	550	590	0.722364		DIHI	1.975	-3.73	550	600	0.680949
DIHK	2.156	-5.43	565	660	0.583616		DIHK	1.775	-7.65	565	385	0.616987
DIHL	1.954	-1.38	550	600	0.63635		DIHL	1.956	-3.6	550	600	0.630187
DIHN	1.962	-3.48	551	600	0.851344		DIHN	1.91	-5.7	551	590	0.26453
DIHQ	1.744	-3.4	566	590	0.832405		DIHQ	1.831	-5.62	566	500	0.496221
DIHR	2.057	-4.44	593	660	0.663507		DIHR	1.895	-6.66	593	660	0.253568
DIHT	2.022	-2.88	538	590	0.500463		DIHT	2.1	-5.1	538	600	0.609235
DIHV	1.956	-2.17	536	600	0.529993		DIHV	1.998	-4.39	536	600	0.499677
DIHY	2.069	-1.92	600	588	0.606559		DIHY	2.32	-4.14	600	720	0.440946
DIIH	1.908	-1.51	550	600	0.830297		DIIH	1.911	-3.73	550	600	0.27814
DIKH	2.182	-5.43	565	660	0.695217		DIKH	1.94	-7.65	565	660	0.378263
DILH	1.955	-1.38	550	600	0.761671		DILH	2.054	-3.6	550	600	0.694482
DINH	1.943	-3.48	551	600	0.665265		DINH	1.99	-5.7	551	600	0.367038
DIQH	1.901	-3.4	566	600	0.492933		DIQH	1.921	-5.62	566	600	0.37575
DIRH	2.083	-4.44	593	660	0.537874		DIRH	1.895	-6.66	593	561	0.818054
DITH	2.033	-2.88	538	600	0.754597		DITH	2.069	-5.1	538	600	0.468417
DIVH	1.971	-2.17	536	600	0.569643		DIVH	1.875	-4.39	536	340	0.586886
DIYH	1.931	-1.92	600	552	0.574648		DIYH	2.151	-4.14	600	720	0.306938
DKAH	2.075	-7.05	523	600	0.769665		DKAH	1.671	-9.27	523	590	0.4029
DKDH	1.889	-10.19	567	660	0.44819		DKDH	2.019	-12.41	567	660	0.20404
DKEH	1.947	-10.18	580	660	0.425383		DKEH	1.889	-12.4	580	660	0.330726
DKFH	2.099	-4.84	599	780	0.337106		DKFH	2.091	-7.06	599	780	0.48724
DKGH	2.113	-7.7	509	600	0.676069		DKGH	1.842	-9.92	509	600	0.199639
DKHA	1.788	-7.05	523	480	0.308468		DKHA	1.707	-9.27	523	600	0.366395
DKHD	1.862	-10.19	567	660	0.523139		DKHD	1.841	-12.41	567	660	0.124552
DKHE	1.848	-10.18	580	660	0.454906		DKHE	1.719	-12.4	580	330	0.446785
DKHF	2.146	-4.84	599	494	0.718407		DKHF	1.895	-7.06	599	637	0.233378
DKHG	1.891	-7.7	509	600	0.274656		DKHG	1.711	-9.92	509	600	0.595088
DKHH	2.249	-6.66	589	780	0.536308		DKHH	1.581	-11.1	589	741	0.449144
DKHI	2.173	-5.43	565	660	0.557394		DKHI	1.856	-7.65	565	660	0.403757
DKHK	1.85	-9.35	580	612	0.435564		DKHK	1.563	-11.57	580	720	0.637476
DKHL	2.028	-5.3	565	660	0.450075		DKHL	1.859	-7.52	565	660	0.443471
DKHN	2.192	-7.4	566	660	0.614636		DKHN	1.719	-9.62	566	660	0.504728
DKHQ	2.036	-7.32	581	660	0.719727		DKHQ	1.71	-9.54	581	638	0.27452
DKHR	1.808	-8.36	608	576	0.367089		DKHR	1.574	-10.58	608	708	0.709559
DKHT	1.967	-6.8	553	440	0.869239		DKHT	1.917	-9.02	553	660	0.666486
DKHV	2.2	-6.09	551	660	0.489181		DKHV	1.948	-8.31	551	660	0.476894
DKHY	2.189	-5.84	615	780	0.185676		DKHY	2.073	-8.06	615	780	0.399232
DKIH	2.096	-5.43	565	660	0.688497		DKIH	1.804	-7.65	565	418	0.48414
DKKH	2.115	-9.35	580	720	0.676147		DKKH	1.562	-11.57	580	696	0.771635
DKLH	1.878	-5.3	565	462	0.475989		DKLH	1.966	-7.52	565	660	0.369703
DKNH	1.969	-7.4	566	440	0.71111		DKNH	1.768	-9.62	566	660	0.403561
DKQH	1.965	-7.32	581	660	0.469222		DKQH	1.828	-9.54	581	649	0.454103
DKRH	1.766	-8.36	608	492	0.595246		DKRH	1.561	-10.58	608	420	0.605706
DKTH	2.188	-6.8	553	660	0.608035		DKTH	1.845	-9.02	553	660	0.258549
DKVH	1.957	-6.09	551	484	0.843378		DKVH	1.868	-8.31	551	660	0.319108
DKYH	2.22	-5.84	615	780	0.300506		DKYH	2.056	-8.06	615	780	0.440617
DLAH	1.872	-3	508	540	0.797275		DLAH	1.97	-5.22	508	540	0.828615
DLDH	1.557	-6.14	552	380	0.577544		DLDH	1.891	-8.36	552	600	0.581805
DLEH	1.58	-6.13	565	590	0.557929		DLEH	1.785	-8.35	565	480	0.418555
DLFH	2.118	-0.79	584	720	0.431957		DLFH	2.21	-3.01	584	720	0.523124
DLGH	1.802	-3.65	494	540	0.327057		DLGH	2.017	-5.87	494	540	0.675637
DLHA	1.794	-3	508	531	0.798481		DLHA	1.902	-5.22	508	540	0.613457
DLHD	1.662	-6.14	552	600	0.529878		DLHD	1.733	-8.36	552	590	0.316999
DLHE	1.532	-6.13	565	590	0.475241		DLHE	1.658	-8.35	565	600	0.238122
DLHF	2.349	-0.79	584	720	0.823987		DLHF	2.086	-3.01	584	720	0.264227
DLHG	1.816	-3.65	494	540	0.665359		DLHG	1.784	-5.87	494	540	0.723042
DLHH	2.077	-2.61	574	720	0.625324		DLHH	1.857	-7.05	574	720	0.228744
DLHI	1.884	-1.38	550	600	0.662014		DLHI	1.83	-3.6	550	530	0.724529
DLHK	2.243	-5.3	565	660	0.707187		DLHK	1.92	-7.52	565	660	0.361982
DLHL	1.945	-1.25	550	600	0.82207		DLHL	1.862	-3.47	550	500	0.629065
DLHN	1.868	-3.35	551	590	0.75284		DLHN	1.943	-5.57	551	600	0.518409
DLHQ	1.739	-3.27	566	600	0.508439		DLHQ	1.838	-5.49	566	600	0.628331
DLHR	2.206	-4.31	593	660	0.872482		DLHR	1.778	-6.53	593	660	0.146204
DLHT	2.059	-2.75	538	600	0.712576		DLHT	2.058	-4.97	538	600	0.377806
DLHV	2	-2.04	536	600	0.728332		DLHV	2.042	-4.26	536	600	0.432536
DLHY	1.993	-1.79	600	492	0.685202		DLHY	1.987	-4.01	600	480	0.481463
DLIH	1.864	-1.38	550	600	0.754477		DLIH	2.019	-3.6	550	600	0.396502
DLKH	1.954	-5.3	565	550	0.66154		DLKH	1.993	-7.52	565	660	0.437824
DLLH	1.986	-1.25	550	600	0.781871		DLLH	1.999	-3.47	550	600	0.630487
DLNH	1.95	-3.35	551	600	0.547444		DLNH	2.07	-5.57	551	600	0.472301
DLQH	1.843	-3.27	566	600	0.666468		DLQH	2.066	-5.49	566	600	0.745392
DLRH	2.212	-4.31	593	660	0.747829		DLRH	1.949	-6.53	593	660	0.397529
DLTH	2.074	-2.75	538	600	0.691593		DLTH	2.077	-4.97	538	600	0.469707
DLVH	1.999	-2.04	536	600	0.529394		DLVH	2.053	-4.26	536	600	0.50554
DLYH	2.179	-1.79	600	720	0.533587		DLYH	2.12	-4.01	600	720	0.284511
DNAH	1.957	-5.1	509	540	0.461471		DNAH	1.916	-7.32	509	540	0.510608
DNDH	1.572	-8.24	553	580	0.438315		DNDH	1.813	-10.46	553	590	0.324822
DNEH	1.585	-8.23	566	590	0.288247		DNEH	1.747	-10.45	566	600	0.390136
DNFH	2.152	-2.89	585	720	0.357349		DNFH	2.089	-5.11	585	720	0.249949
DNGH	1.749	-5.75	495	288	0.804502		DNGH	1.937	-7.97	495	414	0.640367
DNHA	1.734	-5.1	509	495	0.69524		DNHA	1.783	-7.32	509	531	0.546775
DNHD	1.514	-8.24	553	580	0.438523		DNHD	1.787	-10.46	553	590	0.342523
DNHE	1.467	-8.23	566	590	0.262973		DNHE	1.663	-10.45	566	590	0.331911
DNHF	2.077	-2.89	585	720	0.327342		DNHF	2.256	-5.11	585	720	0.556946
DNHG	1.866	-5.75	495	540	0.657717		DNHG	1.807	-7.97	495	468	0.486865
DNHH	2.025	-4.71	575	720	0.236015		DNHH	1.845	-9.15	575	720	0.0928222
DNHI	1.868	-3.48	551	590	0.373119		DNHI	1.911	-5.7	551	330	0.905789
DNHK	2.147	-7.4	566	660	0.31705		DNHK	1.896	-9.62	566	660	0.249145
DNHL	1.978	-3.35	551	600	0.491358		DNHL	2.078	-5.57	551	600	0.61184
DNHN	1.968	-5.45	552	600	0.407642		DNHN	2.014	-7.67	552	600	0.385146
DNHQ	1.684	-5.37	567	590	0.248003		DNHQ	1.846	-7.59	567	600	0.236132
DNHR	2.163	-6.41	594	660	0.677891		DNHR	1.82	-8.63	594	660	0.207455
DNHT	2.011	-4.85	539	600	0.4085		DNHT	2.13	-7.07	539	600	0.533819
DNHV	2.106	-4.14	537	600	0.673845		DNHV	2.128	-6.36	537	600	0.461593
DNHY	2.041	-3.89	601	720	0.437593		DNHY	2.151	-6.11	601	720	0.243567
DNIH	2.005	-3.48	551	600	0.444926		DNIH	2.03	-5.7	551	600	0.365061
DNKH	2.143	-7.4	566	660	0.458689		DNKH	1.911	-9.62	566	649	0.486612
DNLH	2.014	-3.35	551	600	0.52924		DNLH	2.083	-5.57	551	600	0.574901
DNNH	1.92	-5.45	552	600	0.567933		DNNH	2.067	-7.67	552	600	0.494427
DNQH	1.802	-5.37	567	600	0.343461		DNQH	2.009	-7.59	567	600	0.800796
DNRH	2.109	-6.41	594	660	0.524183		DNRH	1.824	-8.63	594	660	0.153458
DNTH	2.031	-4.85	539	600	0.605318		DNTH	2.028	-7.07	539	600	0.716933
DNVH	1.905	-4.14	537	600	0.318409		DNVH	2.045	-6.36	537	600	0.610312
DNYH	2.001	-3.89	601	720	0.106347		DNYH	1.912	-6.11	601	636	0.43893
DQAH	1.798	-5.02	524	540	0.291967		DQAH	1.916	-7.24	524	531	0.589354
DQDH	1.543	-8.16	568	590	0.787328		DQDH	1.826	-10.38	568	600	0.337495
DQEH	1.535	-8.15	581	580	0.51092		DQEH	1.706	-10.37	581	600	0.387936
DQFH	1.992	-2.81	600	720	0.25261		DQFH	2.173	-5.03	600	720	0.648345
DQGH	1.663	-5.67	510	432	0.445091		DQGH	1.877	-7.89	510	540	0.497641
DQHA	1.598	-5.02	524	495	0.361495		DQHA	1.806	-7.24	524	522	0.550437
DQHD	1.519	-8.16	568	580	0.540886		DQHD	1.677	-10.38	568	600	0.249466
DQHE	1.392	-8.15	581	350	0.361042		DQHE	1.659	-10.37	581	580	0.608177
DQHF	2.098	-2.81	600	720	0.389351		DQHF	2.291	-5.03	600	720	0.635008
DQHG	1.733	-5.67	510	540	0.419003		DQHG	1.762	-7.89	510	432	0.765935
DQHH	1.911	-4.63	590	684	0.416518		DQHH	1.75	-9.07	590	612	0.395654
DQHI	1.994	-3.4	566	600	0.518093		DQHI	1.881	-5.62	566	530	0.835989
DQHK	2.068	-7.32	581	649	0.40793		DQHK	1.794	-9.54	581	660	0.457112
DQHL	1.96	-3.27	566	600	0.539826		DQHL	2.032	-5.49	566	600	0.364253
DQHN	1.862	-5.37	567	580	0.626042		DQHN	1.896	-7.59	567	590	0.24805
DQHQ	1.67	-5.29	582	580	0.482324		DQHQ	1.833	-7.51	582	590	0.527518
DQHR	2.059	-6.33	609	583	0.612781		DQHR	1.864	-8.55	609	660	0.540815
DQHT	1.948	-4.77	554	600	0.324638		DQHT	2.002	-6.99	554	600	0.311735
DQHV	1.827	-4.06	552	540	0.769058		DQHV	1.952	-6.28	552	320	0.731442
DQHY	2.072	-3.81	616	720	0.41186		DQHY	2.229	-6.03	616	720	0.813805
DQIH	1.926	-3.4	566	600	0.680025		DQIH	1.946	-5.62	566	600	0.365834
DQKH	2.088	-7.32	581	660	0.761502		DQKH	1.71	-9.54	581	440	0.680405
DQLH	1.933	-3.27	566	600	0.825284		DQLH	1.813	-5.49	566	330	0.69055
DQNH	1.837	-5.37	567	470	0.762007		DQNH	1.912	-7.59	567	590	0.362465
DQQH	1.672	-5.29	582	560	0.516008		DQQH	1.956	-7.51	582	600	0.594895
DQRH	2.078	-6.33	609	660	0.505193		DQRH	1.782	-8.55	609	649	0.646908
DQTH	1.718	-4.77	554	360	0.771601		DQTH	1.885	-6.99	554	590	0.383467
DQVH	1.881	-4.06	552	600	0.676753		DQVH	1.876	-6.28	552	310	0.437179
DQYH	2.174	-3.81	616	720	0.579729		DQYH	2.087	-6.03	616	600	0.54012
DRAH	2.044	-6.06	551	600	0.509847		DRAH	1.809	-8.28	551	600	0.437764
DRDH	1.814	-9.2	595	539	0.418866		DRDH	1.888	-11.42	595	660	0.762294
DREH	1.977	-9.19	608	660	0.802812		DREH	2.007	-11.41	608	660	0.260326
DRFH	2.262	-3.85	627	780	0.753858		DRFH	2.089	-6.07	627	780	0.163915
DRGH	2.09	-6.71	537	600	0.517323		DRGH	1.768	-8.93	537	590	0.505027
DRHA	1.941	-6.06	551	590	0.488374		DRHA	1.624	-8.28	551	580	0.394488
DRHD	1.896	-9.2	595	660	0.721954		DRHD	1.97	-11.42	595	660	0.363981
DRHE	1.808	-9.19	608	660	0.414748		DRHE	1.858	-11.41	608	660	0.196472
DRHF	2.029	-3.85	627	637	0.558461		DRHF	1.951	-6.07	627	780	0.417447
DRHG	1.943	-6.71	537	600	0.40646		DRHG	1.599	-8.93	537	590	0.270997
DRHH	2.177	-5.67	617	780	0.428975		DRHH	1.557	-10.11	617	533	0.353399
DRHI	2.138	-4.44	593	660	0.447182		DRHI	1.849	-6.66	593	594	0.403365
DRHK	1.966	-8.36	608	720	0.674791		DRHK	1.483	-10.58	608	336	0.483246
DRHL	2.026	-4.31	593	517	0.856756		DRHL	1.846	-6.53	593	660	0.543579
DRHN	1.989	-6.41	594	495	0.673395		DRHN	1.867	-8.63	594	660	0.521699
DRHQ	1.984	-6.33	609	660	0.605626		DRHQ	1.754	-8.55	609	660	0.900364
DRHR	1.857	-7.37	636	720	0.145884		DRHR	1.588	-9.59	636	468	0.454812
DRHT	2.096	-5.81	581	660	0.207599		DRHT	1.836	-8.03	581	660	0.346397
DRHV	2.172	-5.1	579	660	0.448451		DRHV	1.798	-7.32	579	341	0.6075
DRHY	2.249	-4.85	643	780	0.337323		DRHY	1.932	-7.07	643	780	0.387652
DRIH	2.075	-4.44	593	660	0.563215		DRIH	1.795	-6.66	593	484	0.369011
DRKH	1.904	-8.36	608	720	0.290497		DRKH	1.627	-10.58	608	720	0.27029
DRLH	2.005	-4.31	593	660	0.640574		DRLH	1.987	-6.53	593	660	0.617219
DRNH	2.13	-6.41	594	660	0.390737		DRNH	1.788	-8.63	594	660	0.417692
DRQH	1.965	-6.33	609	660	0.300965		DRQH	1.82	-8.55	609	660	0.644926
DRRH	1.938	-7.37	636	720	0.380511		DRRH	1.586	-9.59	636	696	0.313564
DRTH	2.065	-5.81	581	660	0.432118		DRTH	2.008	-8.03	581	660	0.517643
DRVH	2.038	-5.1	579	660	0.29146		DRVH	1.802	-7.32	579	385	0.725554
DRYH	2.182	-4.85	643	780	0.269794		DRYH	1.946	-7.07	643	780	0.677348
DTAH	1.94	-4.5	496	540	0.393903		DTAH	2.14	-6.72	496	540	0.703368
DTDH	1.732	-7.64	540	600	0.438164		DTDH	1.949	-9.86	540	600	0.394831
DTEH	1.669	-7.63	553	590	0.496368		DTEH	1.873	-9.85	553	600	0.33536
DTFH	2.023	-2.29	572	384	0.777473		DTFH	2.089	-4.51	572	720	0.310286
DTGH	1.815	-5.15	482	432	0.725114		DTGH	2.056	-7.37	482	540	0.428453
DTHA	1.693	-4.5	496	450	0.393164		DTHA	1.954	-6.72	496	540	0.624818
DTHD	1.612	-7.64	540	600	0.501249		DTHD	1.736	-9.86	540	330	0.553754
DTHE	1.647	-7.63	553	600	0.482636		DTHE	1.822	-9.85	553	600	0.524287
DTHF	2.085	-2.29	572	720	0.496661		DTHF	1.955	-4.51	572	456	0.419389
DTHG	1.79	-5.15	482	540	0.34224		DTHG	1.907	-7.37	482	540	0.454604
DTHH	1.989	-4.11	562	576	0.320219		DTHH	1.862	-8.55	562	432	0.411525
DTHI	1.984	-2.88	538	600	0.639699		DTHI	2.066	-5.1	538	600	0.681273
DTHK	2.232	-6.8	553	660	0.611559		DTHK	2.034	-9.02	553	649	0.386573
DTHL	2.037	-2.75	538	600	0.417846		DTHL	1.982	-4.97	538	600	0.380614
DTHN	2.02	-4.85	539	600	0.588348		DTHN	1.921	-7.07	539	540	0.38539
DTHQ	1.663	-4.77	554	590	0.506722		DTHQ	1.965	-6.99	554	600	0.52656
DTHR	2.039	-5.81	581	660	0.553683		DTHR	1.898	-8.03	581	660	0.35448
DTHT	2.015	-4.25	526	600	0.550731		DTHT	2.071	-6.47	526	600	0.565443
DTHV	2.076	-3.54	524	600	0.647881		DTHV	1.942	-5.76	524	310	0.72993
DTHY	2.194	-3.29	588	720	0.434407		DTHY	2.138	-5.51	588	720	0.250364
DTIH	1.97	-2.88	538	600	0.429988		DTIH	1.901	-5.1	538	320	0.779944
DTKH	2.228	-6.8	553	660	0.54149		DTKH	2.013	-9.02	553	660	0.569336
DTLH	2.014	-2.75	538	590	0.64696		DTLH	2.144	-4.97	538	600	0.590833
DTNH	1.886	-4.85	539	590	0.279485		DTNH	2.005	-7.07	539	520	0.57923
DTQH	1.946	-4.77	554	600	0.488193		DTQH	2.103	-6.99	554	600	0.419646
DTRH	2.165	-5.81	581	660	0.316093		DTRH	1.907	-8.03	581	660	0.328203
DTTH	2.022	-4.25	526	600	0.486817		DTTH	2.066	-6.47	526	600	0.332913
DTVH	1.987	-3.54	524	600	0.290624		DTVH	2.057	-5.76	524	600	0.377536
DTYH	2.045	-3.29	588	444	0.714899		DTYH	2.184	-5.51	588	720	0.25204
DVAH	1.912	-3.79	494	540	0.644981		DVAH	1.946	-6.01	494	486	0.644298
DVDH	1.667	-6.93	538	600	0.385279		DVDH	1.917	-9.15	538	600	0.344762
DVEH	1.662	-6.92	551	590	0.405165		DVEH	1.861	-9.14	551	600	0.369944
DVFH	2.303	-1.58	570	720	0.429025		DVFH	2.234	-3.8	570	720	0.485167
DVGH	1.894	-4.44	480	531	0.802503		DVGH	2.027	-6.66	480	486	0.718518
DVHA	1.87	-3.79	494	540	0.487978		DVHA	1.926	-6.01	494	540	0.439924
DVHD	1.649	-6.93	538	590	0.644009		DVHD	1.819	-9.15	538	600	0.623201
DVHE	1.552	-6.92	551	600	0.454373		DVHE	1.607	-9.14	551	580	0.1268
DVHF	2.314	-1.58	570	720	0.665058		DVHF	2.321	-3.8	570	720	0.547136
DVHG	1.84	-4.44	480	540	0.74405		DVHG	1.819	-6.66	480	531	0.494855
DVHH	2.072	-3.4	560	720	0.54127		DVHH	1.854	-7.84	560	720	0.528104
DVHI	1.862	-2.17	536	310	0.763935		DVHI	2.048	-4.39	536	600	0.596134
DVHK	2.14	-6.09	551	660	0.636325		DVHK	1.91	-8.31	551	660	0.444259
DVHL	2.049	-2.04	536	600	0.720259		DVHL	2.094	-4.26	536	600	0.617278
DVHN	1.991	-4.14	537	600	0.703599		DVHN	1.927	-6.36	537	590	0.341055
DVHQ	1.796	-4.06	552	590	0.83317		DVHQ	1.821	-6.28	552	590	0.464112
DVHR	2.133	-5.1	579	660	0.411844		DVHR	1.87	-7.32	579	660	0.260593
DVHT	2.054	-3.54	524	600	0.599193		DVHT	2.064	-5.76	524	600	0.476015
DVHV	1.961	-2.83	522	600	0.602529		DVHV	1.863	-5.05	522	460	0.587472
DVHY	2.273	-2.58	586	720	0.542029		DVHY	2.25	-4.8	586	720	0.354316
DVIH	2.031	-2.17	536	600	0.556819		DVIH	1.943	-4.39	536	430	0.559226
DVKH	2.195	-6.09	551	660	0.685993		DVKH	1.867	-8.31	551	605	0.304024
DVLH	1.937	-2.04	536	600	0.544368		DVLH	2.12	-4.26	536	600	0.511069
DVNH	1.978	-4.14	537	600	0.308083		DVNH	2.084	-6.36	537	600	0.380033
DVQH	1.909	-4.06	552	600	0.559212		DVQH	2.056	-6.28	552	600	0.665524
DVRH	1.976	-5.1	579	407	0.74504		DVRH	1.869	-7.32	579	660	0.339833
DVTH	2.103	-3.54	524	600	0.541701		DVTH	2.056	-5.76	524	600	0.526205
DVVH	2.002	-2.83	522	590	0.698573		DVVH	2.102	-5.05	522	600	0.707514
DVYH	2.043	-2.58	586	720	0.423494		DVYH	2.148	-4.8	586	720	0.234618
DYAH	1.869	-3.54	558	616	0.466575		DYAH	2.115	-5.76	558	660	0.395429
DYDH	1.651	-6.68	602	720	0.158905		DYDH	1.948	-8.9	602	720	0.371472
DYEH	1.621	-6.67	615	720	0.348009		DYEH	1.888	-8.89	615	720	0.4204
DYFH	2.193	-1.33	634	840	0.276318		DYFH	2.247	-3.55	634	840	0.450536
DYGH	2.025	-4.19	544	660	0.488079		DYGH	2.049	-6.41	544	660	0.365281
DYHA	2.025	-3.54	558	660	0.282044		DYHA	2.103	-5.76	558	660	0.396817
DYHD	1.563	-6.68	602	480	0.665972		DYHD	1.853	-8.9	602	720	0.249342
DYHE	1.656	-6.67	615	720	0.391308		DYHE	1.739	-8.89	615	396	0.594502
DYHF	2.144	-1.33	634	658	0.459096		DYHF	2.142	-3.55	634	602	0.418896
DYHG	1.974	-4.19	544	660	0.524505		DYHG	2.041	-6.41	544	660	0.51203
DYHH	1.963	-3.15	624	826	0.646124		DYHH	1.772	-7.59	624	840	0.315508
DYHI	2.141	-1.92	600	720	0.44008		DYHI	2.226	-4.14	600	720	0.547924
DYHK	2.235	-5.84	615	780	0.484878		DYHK	2.052	-8.06	615	780	0.674617
DYHL	2.201	-1.79	600	720	0.449586		DYHL	2.108	-4.01	600	720	0.418695
DYHN	1.974	-3.89	601	396	0.649425		DYHN	1.973	-6.11	601	720	0.471989
DYHQ	1.901	-3.81	616	720	0.459413		DYHQ	2.004	-6.03	616	720	0.479051
DYHR	2.217	-4.85	643	780	0.334431		DYHR	1.943	-7.07	643	780	0.641053
DYHT	2.104	-3.29	588	720	0.52355		DYHT	2.01	-5.51	588	372	0.572107
DYHV	2.136	-2.58	586	720	0.608738		DYHV	2.198	-4.8	586	720	0.328014
DYHY	2.249	-2.33	650	840	0.464581		DYHY	2.075	-4.55	650	476	0.366671
DYIH	2.036	-1.92	600	720	0.457068		DYIH	2.186	-4.14	600	720	0.407995
DYKH	2.185	-5.84	615	780	0.520287		DYKH	1.868	-8.06	615	780	0.250513
DYLH	2.07	-1.79	600	720	0.709161		DYLH	2.051	-4.01	600	720	0.37816
DYNH	1.994	-3.89	601	720	0.642409		DYNH	2.022	-6.11	601	720	0.325222
DYQH	1.839	-3.81	616	720	0.285433		DYQH	1.93	-6.03	616	720	0.265084
DYRH	2.272	-4.85	643	780	0.512154		DYRH	1.9	-7.07	643	780	0.576088
DYTH	1.984	-3.29	588	720	0.675467		DYTH	2.069	-5.51	588	720	0.299667
DYVH	1.914	-2.58	586	552	0.476802		DYVH	2.059	-4.8	586	720	0.282932
DYYH	2.209	-2.33	650	840	0.265739		DYYH	2.089	-4.55	650	840	0.610956
EAAH	1.626	-4.74	479	480	0.476041		EAAH	1.79	-6.96	479	480	0.698236
EADH	1.459	-7.88	523	522	0.544168		EADH	1.685	-10.1	523	540	0.746989
EAEH	1.54	-7.87	536	540	0.275863		EAEH	1.712	-10.09	536	540	0.696377
EAFH	1.821	-2.53	555	495	0.410653		EAFH	2.072	-4.75	555	660	0.551435
EAGH	1.801	-5.39	465	480	0.831884		EAGH	1.841	-7.61	465	480	0.817747
EAHA	1.616	-4.74	479	472	0.345278		EAHA	1.581	-6.96	479	464	0.647314
EAHD	1.452	-7.88	523	495	0.271716		EAHD	1.604	-10.1	523	540	0.636458
EAHE	1.297	-7.87	536	423	0.711254		EAHE	1.499	-10.09	536	504	0.703855
EAHF	2.15	-2.53	555	660	0.802517		EAHF	2.121	-4.75	555	660	0.481922
EAHG	1.546	-5.39	465	472	0.350253		EAHG	1.682	-7.61	465	480	0.707492
EAHH	1.901	-4.35	545	660	0.407221		EAHH	1.753	-8.79	545	660	0.503869
EAHI	1.871	-3.12	521	540	0.600381		EAHI	1.712	-5.34	521	297	0.801826
EAHK	2.098	-7.04	536	600	0.711858		EAHK	1.689	-9.26	536	590	0.526832
EAHL	1.804	-2.99	521	540	0.533999		EAHL	1.79	-5.21	521	540	0.379053
EAHN	1.863	-5.09	522	540	0.713643		EAHN	1.685	-7.31	522	450	0.605306
EAHQ	1.548	-5.01	537	522	0.411719		EAHQ	1.639	-7.23	537	531	0.316575
EAHR	2.017	-6.05	564	600	0.552746		EAHR	1.652	-8.27	564	510	0.451708
EAHT	1.827	-4.49	509	540	0.608657		EAHT	1.78	-6.71	509	324	0.638934
EAHV	1.944	-3.78	507	540	0.700038		EAHV	1.886	-6	507	540	0.657631
EAHY	2.034	-3.53	571	660	0.562471		EAHY	1.893	-5.75	571	506	0.470446
EAIH	1.783	-3.12	521	540	0.690434		EAIH	1.936	-5.34	521	540	0.553772
EAKH	2.036	-7.04	536	600	0.721657		EAKH	1.643	-9.26	536	590	0.514034
EALH	1.714	-2.99	521	432	0.567705		EALH	1.797	-5.21	521	504	0.63428
EANH	1.82	-5.09	522	531	0.375327		EANH	1.946	-7.31	522	540	0.689902
EAQH	1.581	-5.01	537	513	0.593021		EAQH	1.775	-7.23	537	540	0.694361
EARH	1.942	-6.05	564	600	0.79971		EARH	1.677	-8.27	564	600	0.532481
EATH	1.752	-4.49	509	333	0.787973		EATH	1.923	-6.71	509	540	0.471385
EAVH	1.93	-3.78	507	540	0.81108		EAVH	1.947	-6	507	540	0.66252
EAYH	2.007	-3.53	571	660	0.540863		EAYH	2.031	-5.75	571	660	0.417322
EDAH	1.475	-7.88	523	396	0.601939		EDAH	1.747	-10.1	523	540	0.528871
EDDH	1.344	-11.02	567	580	0.295959		EDDH	1.545	-13.24	567	600	0.638307
EDEH	1.288	-11.01	580	350	0.578052		EDEH	1.477	-13.23	580	550	0.296644
EDFH	1.86	-5.67	599	720	0.576209		EDFH	1.9	-7.89	599	720	0.104609
EDGH	1.581	-8.53	509	540	0.473323		EDGH	1.693	-10.75	509	540	0.187499
EDHA	1.428	-7.88	523	504	0.377523		EDHA	1.627	-10.1	523	540	0.324845
EDHD	1.238	-11.02	567	250	0.519		EDHD	1.425	-13.24	567	470	0.378804
EDHE	1.209	-11.01	580	300	0.527405		EDHE	1.414	-13.23	580	280	0.238707
EDHF	1.982	-5.67	599	720	0.273668		EDHF	2.1	-7.89	599	720	0.507311
EDHG	1.515	-8.53	509	531	0.260456		EDHG	1.688	-10.75	509	540	0.41737
EDHH	1.715	-7.49	589	708	0.410222		EDHH	1.775	-11.93	589	720	0.447664
EDHI	1.687	-6.26	565	370	0.816351		EDHI	1.929	-8.48	565	600	0.345678
EDHK	1.957	-10.18	580	660	0.68694		EDHK	1.995	-12.4	580	660	0.55682
EDHL	1.665	-6.13	565	470	0.600536		EDHL	1.892	-8.35	565	600	0.39698
EDHN	1.596	-8.23	566	420	0.382511		EDHN	1.837	-10.45	566	590	0.830866
EDHQ	1.462	-8.15	581	580	0.810256		EDHQ	1.609	-10.37	581	590	0.532748
EDHR	2.035	-9.19	608	660	0.636609		EDHR	1.934	-11.41	608	660	0.320383
EDHT	1.635	-7.63	553	600	0.147875		EDHT	1.824	-9.85	553	340	0.444352
EDHV	1.683	-6.92	551	430	0.554472		EDHV	1.962	-9.14	551	600	0.498041
EDHY	1.837	-6.67	615	720	0.460984		EDHY	1.924	-8.89	615	420	0.551468
EDIH	1.641	-6.26	565	590	0.380393		EDIH	1.762	-8.48	565	600	0.497164
EDKH	1.857	-10.18	580	660	0.525876		EDKH	1.798	-12.4	580	660	0.514469
EDLH	1.702	-6.13	565	600	0.440899		EDLH	1.75	-8.35	565	600	0.195458
EDNH	1.607	-8.23	566	570	0.358583		EDNH	1.802	-10.45	566	600	0.419961
EDQH	1.495	-8.15	581	590	0.499428		EDQH	1.744	-10.37	581	600	0.275772
EDRH	1.858	-9.19	608	660	0.393925		EDRH	1.912	-11.41	608	649	0.282247
EDTH	1.684	-7.63	553	600	0.521566		EDTH	1.876	-9.85	553	600	0.330348
EDVH	1.681	-6.92	551	600	0.301877		EDVH	1.764	-9.14	551	600	0.237651
EDYH	1.773	-6.67	615	720	0.147086		EDYH	1.853	-8.89	615	720	0.228512
EEAH	1.481	-7.87	536	522	0.185746		EEAH	1.585	-10.09	536	531	0.442147
EEDH	1.287	-11.01	580	480	0.267287		EEDH	1.464	-13.23	580	530	0.181095
EEEH	1.225	-11	593	270	0.469146		EEEH	1.428	-13.22	593	580	0.359584
EEFH	1.799	-5.66	612	444	0.531938		EEFH	1.96	-7.88	612	720	0.254452
EEGH	1.498	-8.52	522	522	0.480176		EEGH	1.709	-10.74	522	540	0.406523
EEHA	1.298	-7.87	536	432	0.458222		EEHA	1.558	-10.09	536	513	0.290589
EEHD	1.284	-11.01	580	440	0.309605		EEHD	1.443	-13.23	580	570	0.19187
EEHE	1.153	-11	593	130	0.488349		EEHE	1.385	-13.22	593	570	0.441588
EEHF	1.798	-5.66	612	624	0.523337		EEHF	2.168	-7.88	612	720	0.250484
EEHG	1.472	-8.52	522	531	0.666003		EEHG	1.591	-10.74	522	540	0.485358
EEHH	1.771	-7.48	602	720	0.230315		EEHH	1.894	-11.92	602	720	0.189227
EEHI	1.661	-6.25	578	430	0.550923		EEHI	1.871	-8.47	578	600	0.3586
EEHK	1.907	-10.17	593	660	0.570218		EEHK	1.944	-12.39	593	660	0.11017
EEHL	1.623	-6.12	578	410	0.650569		EEHL	1.813	-8.34	578	600	0.437775
EEHN	1.598	-8.22	579	600	0.149513		EEHN	1.562	-10.44	579	320	0.491647
EEHQ	1.325	-8.14	594	280	0.36624		EEHQ	1.482	-10.36	594	550	0.624575
EEHR	1.87	-9.18	621	660	0.275049		EEHR	1.759	-11.4	621	649	0.158866
EEHT	1.62	-7.62	566	580	0.527425		EEHT	1.927	-9.84	566	600	0.248852
EEHV	1.679	-6.91	564	330	0.73917		EEHV	1.831	-9.13	564	580	0.497697
EEHY	1.811	-6.66	628	720	0.446809		EEHY	1.995	-8.88	628	720	0.22332
EEIH	1.615	-6.25	578	450	0.351933		EEIH	1.76	-8.47	578	600	0.36932
EEKH	1.875	-10.17	593	660	0.575391		EEKH	1.971	-12.39	593	660	0.436759
EELH	1.632	-6.12	578	410	0.507616		EELH	1.817	-8.34	578	600	0.184018
EENH	1.565	-8.22	579	600	0.377479		EENH	1.796	-10.44	579	590	0.276202
EEQH	1.476	-8.14	594	540	0.217092		EEQH	1.787	-10.36	594	600	0.41934
EERH	1.863	-9.18	621	660	0.270195		EERH	1.862	-11.4	621	550	0.428158
EETH	1.53	-7.62	566	590	0.263987		EETH	1.782	-9.84	566	600	0.36767
EEVH	1.701	-6.91	564	580	0.395416		EEVH	1.832	-9.13	564	600	0.393714
EEYH	1.754	-6.66	628	456	0.638508		EEYH	1.928	-8.88	628	720	0.495643
EFAH	1.828	-2.53	555	594	0.454697		EFAH	1.933	-4.75	555	660	0.0917741
EFDH	1.737	-5.67	599	720	0.278375		EFDH	1.833	-7.89	599	720	0.120467
EFEH	1.702	-5.66	612	720	0.192165		EFEH	1.868	-7.88	612	720	0.418537
EFFH	1.965	-0.32	631	518	0.700364		EFFH	2.164	-2.54	631	840	0.247604
EFGH	1.926	-3.18	541	660	0.587748		EFGH	1.953	-5.4	541	660	0.512407
EFHA	1.956	-2.53	555	660	0.640739		EFHA	2.051	-4.75	555	660	0.413172
EFHD	1.708	-5.67	599	720	0.186329		EFHD	1.9	-7.89	599	720	0.439187
EFHE	1.643	-5.66	612	720	0.395444		EFHE	1.805	-7.88	612	720	0.353482
EFHF	2.098	-0.32	631	840	0.213004		EFHF	2.17	-2.54	631	462	0.703923
EFHG	2.037	-3.18	541	660	0.350299		EFHG	2.02	-5.4	541	660	0.489986
EFHH	1.984	-2.14	621	840	0.519139		EFHH	1.882	-6.58	621	812	0.486441
EFHI	1.799	-0.91	597	552	0.576532		EFHI	1.984	-3.13	597	660	0.64767
EFHK	1.984	-4.83	612	442	0.658766		EFHK	2.04	-7.05	612	780	0.297873
EFHL	2.125	-0.78	597	720	0.57073		EFHL	2.132	-3	597	720	0.479697
EFHN	2.048	-2.88	598	720	0.564674		EFHN	2.159	-5.1	598	720	0.291152
EFHQ	1.869	-2.8	613	720	0.490521		EFHQ	1.867	-5.02	613	372	0.583127
EFHR	2.163	-3.84	640	780	0.0987921		EFHR	1.915	-6.06	640	780	0.217086
EFHT	2.129	-2.28	585	720	0.461464		EFHT	2.17	-4.5	585	720	0.568387
EFHV	2.069	-1.57	583	720	0.450744		EFHV	2.104	-3.79	583	720	0.398342
EFHY	2.267	-1.32	647	840	0.406181		EFHY	2.189	-3.54	647	644	0.451068
EFIH	2.012	-0.91	597	720	0.494983		EFIH	1.957	-3.13	597	720	0.338567
EFKH	2.133	-4.83	612	780	0.529933		EFKH	1.788	-7.05	612	598	0.681205
EFLH	1.939	-0.78	597	720	0.459315		EFLH	2.073	-3	597	720	0.35102
EFNH	1.968	-2.88	598	720	0.633355		EFNH	1.99	-5.1	598	720	0.276562
EFQH	1.921	-2.8	613	720	0.550628		EFQH	1.896	-5.02	613	720	0.461748
EFRH	2.049	-3.84	640	780	0.445542		EFRH	1.925	-6.06	640	598	0.745522
EFTH	1.901	-2.28	585	720	0.750869		EFTH	2.072	-4.5	585	720	0.285475
EFVH	2.03	-1.57	583	720	0.475942		EFVH	1.912	-3.79	583	432	0.823889
EFYH	2.182	-1.32	647	840	0.624665		EFYH	2.04	-3.54	647	840	0.129338
EGAH	1.773	-5.39	465	480	0.808243		EGAH	1.844	-7.61	465	480	0.470272
EGDH	1.554	-8.53	509	522	0.567056		EGDH	1.684	-10.75	509	540	0.494313
EGEH	1.58	-8.52	522	540	0.434818		EGEH	1.7	-10.74	522	486	0.687376
EGFH	2.076	-3.18	541	660	0.529568		EGFH	2.047	-5.4	541	660	0.510701
EGGH	1.864	-6.04	451	480	0.64616		EGGH	1.909	-8.26	451	480	0.594205
EGHA	1.671	-5.39	465	472	0.796458		EGHA	1.656	-7.61	465	464	0.301305
EGHD	1.482	-8.53	509	522	0.428235		EGHD	1.677	-10.75	509	540	0.320704
EGHE	1.467	-8.52	522	495	0.415723		EGHE	1.624	-10.74	522	522	0.354791
EGHF	2.196	-3.18	541	660	0.646365		EGHF	1.955	-5.4	541	352	0.757999
EGHG	1.584	-6.04	451	384	0.572428		EGHG	1.57	-8.26	451	352	0.702764
EGHH	1.779	-5	531	528	0.717743		EGHH	1.624	-9.44	531	462	0.35725
EGHI	1.866	-3.77	507	540	0.839168		EGHI	1.937	-5.99	507	540	0.526795
EGHK	1.958	-7.69	522	600	0.428689		EGHK	1.817	-9.91	522	600	0.468219
EGHL	1.9	-3.64	507	540	0.713098		EGHL	1.904	-5.86	507	540	0.606629
EGHN	1.76	-5.74	508	540	0.365427		EGHN	1.802	-7.96	508	414	0.581876
EGHQ	1.618	-5.66	523	504	0.693287		EGHQ	1.728	-7.88	523	288	0.765708
EGHR	1.85	-6.7	550	380	0.816683		EGHR	1.719	-8.92	550	590	0.629677
EGHT	1.884	-5.14	495	540	0.660958		EGHT	1.78	-7.36	495	396	0.477821
EGHV	1.836	-4.43	493	540	0.639697		EGHV	1.796	-6.65	493	387	0.668171
EGHY	1.862	-4.18	557	572	0.532949		EGHY	2.184	-6.4	557	660	0.454586
EGIH	1.88	-3.77	507	540	0.668038		EGIH	1.956	-5.99	507	531	0.684948
EGKH	1.956	-7.69	522	540	0.499361		EGKH	1.714	-9.91	522	590	0.719687
EGLH	1.804	-3.64	507	531	0.615617		EGLH	1.861	-5.86	507	540	0.513343
EGNH	1.865	-5.74	508	540	0.656816		EGNH	1.975	-7.96	508	540	0.49773
EGQH	1.743	-5.66	523	540	0.662515		EGQH	2.009	-7.88	523	540	0.600759
EGRH	1.881	-6.7	550	530	0.560581		EGRH	1.863	-8.92	550	600	0.568952
EGTH	1.915	-5.14	495	540	0.486524		EGTH	2.007	-7.36	495	540	0.367487
EGVH	1.837	-4.43	493	531	0.710152		EGVH	1.922	-6.65	493	540	0.391042
EGYH	1.815	-4.18	557	418	0.531193		EGYH	1.91	-6.4	557	330	0.637037
EHAA	1.675	-4.74	479	456	0.537884		EHAA	1.567	-6.96	479	472	0.713871
EHAD	1.327	-7.88	523	504	0.618996		EHAD	1.56	-10.1	523	513	0.611251
EHAE	1.281	-7.87	536	153	0.352269		EHAE	1.542	-10.09	536	522	0.265519
EHAF	1.92	-2.53	555	484	0.672331		EHAF	1.913	-4.75	555	660	0.369355
EHAG	1.703	-5.39	465	472	0.739755		EHAG	1.714	-7.61	465	464	0.60911
EHAH	1.87	-4.35	545	660	0.624529		EHAH	1.604	-8.79	545	660	0.105163
EHAI	1.809	-3.12	521	540	0.766523		EHAI	1.833	-5.34	521	540	0.779953
EHAK	1.805	-7.04	536	410	0.850868		EHAK	1.65	-9.26	536	600	0.619035
EHAL	1.9	-2.99	521	540	0.664884		EHAL	1.852	-5.21	521	540	0.530506
EHAN	1.724	-5.09	522	531	0.559246		EHAN	1.893	-7.31	522	531	0.468132
EHAQ	1.586	-5.01	537	522	0.798367		EHAQ	1.693	-7.23	537	522	0.58337
EHAR	1.9	-6.05	564	600	0.480055		EHAR	1.64	-8.27	564	600	0.532261
EHAT	1.875	-4.49	509	540	0.57849		EHAT	1.727	-6.71	509	333	0.857741
EHAV	1.911	-3.78	507	540	0.890458		EHAV	1.733	-6	507	342	0.809056
EHAY	2.005	-3.53	571	660	0.469878		EHAY	1.923	-5.75	571	660	0.261219
EHDA	1.246	-7.88	523	288	0.426981		EHDA	1.481	-10.1	523	495	0.485948
EHDD	1.239	-11.02	567	400	0.649358		EHDD	1.435	-13.24	567	580	0.22284
EHDE	1.196	-11.01	580	250	0.419953		EHDE	1.301	-13.23	580	480	0.446868
EHDF	1.837	-5.67	599	720	0.327175		EHDF	1.943	-7.89	599	720	0.364262
EHDG	1.466	-8.53	509	522	0.743743		EHDG	1.623	-10.75	509	396	0.287949
EHDH	1.604	-7.49	589	720	0.679811		EHDH	1.804	-11.93	589	708	0.529549
EHDI	1.675	-6.26	565	600	0.450935		EHDI	1.911	-8.48	565	600	0.445848
EHDK	1.828	-10.18	580	572	0.690277		EHDK	1.869	-12.4	580	660	0.335552
EHDL	1.547	-6.13	565	330	0.697687		EHDL	1.724	-8.35	565	350	0.817234
EHDN	1.573	-8.23	566	580	0.513299		EHDN	1.752	-10.45	566	590	0.29806
EHDQ	1.39	-8.15	581	440	0.637763		EHDQ	1.663	-10.37	581	600	0.521252
EHDR	2.008	-9.19	608	660	0.441011		EHDR	1.985	-11.41	608	660	0.698768
EHDT	1.627	-7.63	553	600	0.332627		EHDT	1.741	-9.85	553	360	0.425974
EHDV	1.629	-6.92	551	600	0.375177		EHDV	1.893	-9.14	551	600	0.481479
EHDY	1.648	-6.67	615	720	0.237356		EHDY	1.9	-8.89	615	720	0.199118
EHEA	1.313	-7.87	536	450	0.263771		EHEA	1.448	-10.09	536	477	0.394724
EHED	1.254	-11.01	580	220	0.351775		EHED	1.341	-13.23	580	340	0.46114
EHEE	1.215	-11	593	250	0.391934		EHEE	1.279	-13.22	593	300	0.455571
EHEF	1.792	-5.66	612	720	0.567316		EHEF	1.852	-7.88	612	552	0.46568
EHEG	1.444	-8.52	522	333	0.462092		EHEG	1.652	-10.74	522	531	0.519102
EHEH	1.556	-7.48	602	600	0.567432		EHEH	1.794	-11.92	602	708	0.287305
EHEI	1.584	-6.25	578	590	0.323718		EHEI	1.814	-8.47	578	600	0.334888
EHEK	1.918	-10.17	593	660	0.284501		EHEK	1.755	-12.39	593	660	0.481522
EHEL	1.518	-6.12	578	530	0.314504		EHEL	1.834	-8.34	578	600	0.409145
EHEN	1.574	-8.22	579	560	0.667439		EHEN	1.723	-10.44	579	600	0.404077
EHEQ	1.367	-8.14	594	540	0.428639		EHEQ	1.651	-10.36	594	600	0.393264
EHER	1.738	-9.18	621	374	0.561183		EHER	2.023	-11.4	621	660	0.606192
EHET	1.582	-7.62	566	590	0.468824		EHET	1.752	-9.84	566	590	0.278998
EHEV	1.633	-6.91	564	600	0.233022		EHEV	1.742	-9.13	564	340	0.826079
EHEY	1.674	-6.66	628	720	0.252504		EHEY	1.884	-8.88	628	720	0.224443
EHFA	1.828	-2.53	555	473	0.705176		EHFA	1.936	-4.75	555	396	0.824176
EHFD	1.74	-5.67	599	720	0.561534		EHFD	1.844	-7.89	599	720	0.230055
EHFE	1.673	-5.66	612	720	0.202342		EHFE	1.849	-7.88	612	720	0.248158
EHFF	2.314	-0.32	631	840	0.576106		EHFF	2.342	-2.54	631	840	0.713103
EHFG	1.92	-3.18	541	660	0.468722		EHFG	2.034	-5.4	541	660	0.400016
EHFH	2.146	-2.14	621	840	0.268095		EHFH	1.82	-6.58	621	686	0.448943
EHFI	1.993	-0.91	597	720	0.287286		EHFI	1.924	-3.13	597	456	0.756711
EHFK	2.077	-4.83	612	663	0.597957		EHFK	1.979	-7.05	612	780	0.459778
EHFL	2.137	-0.78	597	720	0.676731		EHFL	1.943	-3	597	360	0.80965
EHFN	2.079	-2.88	598	720	0.50061		EHFN	2.087	-5.1	598	720	0.619186
EHFQ	1.82	-2.8	613	684	0.236736		EHFQ	1.998	-5.02	613	720	0.432317
EHFR	2.051	-3.84	640	780	0.300238		EHFR	1.961	-6.06	640	559	0.491557
EHFT	2.085	-2.28	585	720	0.478378		EHFT	2.101	-4.5	585	720	0.663774
EHFV	2.037	-1.57	583	720	0.431364		EHFV	2.167	-3.79	583	720	0.520692
EHFY	2.256	-1.32	647	840	0.469027		EHFY	2.41	-3.54	647	840	0.468635
EHGA	1.646	-5.39	465	480	0.518989		EHGA	1.636	-7.61	465	272	0.825507
EHGD	1.473	-8.53	509	522	0.654723		EHGD	1.65	-10.75	509	531	0.112721
EHGE	1.397	-8.52	522	522	0.638201		EHGE	1.624	-10.74	522	522	0.595328
EHGF	2.064	-3.18	541	660	0.727904		EHGF	2.08	-5.4	541	660	0.364644
EHGG	1.642	-6.04	451	472	0.739797		EHGG	1.682	-8.26	451	344	0.706879
EHGH	1.842	-5	531	660	0.596852		EHGH	1.628	-9.44	531	418	0.272015
EHGI	1.888	-3.77	507	540	0.8278		EHGI	1.664	-5.99	507	369	0.883549
EHGK	2.136	-7.69	522	600	0.568773		EHGK	1.738	-9.91	522	590	0.350502
EHGL	1.901	-3.64	507	540	0.725038		EHGL	1.902	-5.86	507	540	0.636236
EHGN	1.763	-5.74	508	459	0.692964		EHGN	1.831	-7.96	508	459	0.528799
EHGQ	1.495	-5.66	523	306	0.64026		EHGQ	1.767	-7.88	523	540	0.766277
EHGR	1.905	-6.7	550	600	0.513838		EHGR	1.767	-8.92	550	600	0.416406
EHGT	1.932	-5.14	495	540	0.520751		EHGT	1.71	-7.36	495	279	0.710976
EHGV	1.879	-4.43	493	540	0.648683		EHGV	1.749	-6.65	493	396	0.847366
EHGY	2.072	-4.18	557	660	0.696917		EHGY	1.882	-6.4	557	330	0.913255
EHHA	1.866	-4.35	545	660	0.404089		EHHA	1.371	-8.79	545	594	0.542029
EHHD	1.647	-7.49	589	720	0.140443		EHHD	1.921	-11.93	589	720	0.607284
EHHE	1.497	-7.48	602	408	0.726234		EHHE	1.547	-11.92	602	540	0.427659
EHHF	2.144	-2.14	621	840	0.230513		EHHF	1.804	-6.58	621	798	0.313996
EHHG	1.992	-5	531	660	0.625432		EHHG	1.618	-9.44	531	660	0.430861
EHHH	1.926	-3.96	611	812	0.483789		EHHH	1.316	-10.62	611	602	0.361255
EHHI	2.095	-2.73	587	720	0.4538		EHHI	1.757	-7.17	587	720	0.170838
EHHK	2.134	-6.65	602	780	0.467376		EHHK	1.469	-11.09	602	403	0.556792
EHHL	2.122	-2.6	587	720	0.48414		EHHL	1.753	-7.04	587	720	0.306913
EHHN	1.976	-4.7	588	720	0.186307		EHHN	1.687	-9.14	588	720	0.234486
EHHQ	1.724	-4.62	603	720	0.212423		EHHQ	1.624	-9.06	603	720	0.222435
EHHR	2.145	-5.66	630	780	0.260144		EHHR	1.529	-10.1	630	767	0.347992
EHHT	2.118	-4.1	575	720	0.766175		EHHT	1.777	-8.54	575	720	0.662931
EHHV	1.909	-3.39	573	408	0.554934		EHHV	1.734	-7.83	573	720	0.203338
EHHY	2.087	-3.14	637	840	0.435745		EHHY	1.796	-7.58	637	840	0.407649
EHIA	1.732	-3.12	521	540	0.607195		EHIA	1.763	-5.34	521	504	0.586335
EHID	1.574	-6.26	565	600	0.775496		EHID	1.67	-8.48	565	590	0.205616
EHIE	1.43	-6.25	578	600	0.378792		EHIE	1.697	-8.47	578	600	0.541979
EHIF	2.089	-0.91	597	720	0.603563		EHIF	2.122	-3.13	597	720	0.731812
EHIG	1.755	-3.77	507	540	0.40419		EHIG	1.8	-5.99	507	540	0.421488
EHIH	2.08	-2.73	587	720	0.405871		EHIH	1.793	-7.17	587	708	0.439198
EHII	1.905	-1.5	563	600	0.662214		EHII	1.731	-3.72	563	440	0.648097
EHIK	2.095	-5.42	578	660	0.640741		EHIK	1.821	-7.64	578	660	0.353075
EHIL	1.904	-1.37	563	600	0.670899		EHIL	1.937	-3.59	563	600	0.469093
EHIN	1.921	-3.47	564	590	0.499886		EHIN	1.81	-5.69	564	600	0.274981
EHIQ	1.626	-3.39	579	590	0.44598		EHIQ	1.949	-5.61	579	600	0.724556
EHIR	1.882	-4.43	606	660	0.272566		EHIR	1.653	-6.65	606	638	0.418498
EHIT	1.984	-2.87	551	600	0.745786		EHIT	2.009	-5.09	551	600	0.656101
EHIV	1.952	-2.16	549	600	0.726658		EHIV	1.827	-4.38	549	440	0.929512
EHIY	2.081	-1.91	613	720	0.562033		EHIY	1.937	-4.13	613	552	0.583314
EHKA	1.986	-7.04	536	590	0.7103		EHKA	1.566	-9.26	536	580	0.639941
EHKD	1.788	-10.18	580	649	0.387139		EHKD	1.899	-12.4	580	660	0.662506
EHKE	1.787	-10.17	593	660	0.353798		EHKE	1.767	-12.39	593	660	0.36371
EHKF	2.204	-4.83	612	780	0.76435		EHKF	1.861	-7.05	612	780	0.358751
EHKG	1.899	-7.69	522	530	0.799671		EHKG	1.568	-9.91	522	420	0.565933
EHKH	2.109	-6.65	602	780	0.317497		EHKH	1.447	-11.09	602	780	0.311868
EHKI	2.061	-5.42	578	660	0.504692		EHKI	1.711	-7.64	578	341	0.734012
EHKK	1.875	-9.34	593	720	0.246565		EHKK	1.45	-11.56	593	696	0.516573
EHKL	2.098	-5.29	578	660	0.564249		EHKL	1.845	-7.51	578	649	0.506293
EHKN	2.003	-7.39	579	660	0.444641		EHKN	1.686	-9.61	579	649	0.541383
EHKQ	1.943	-7.31	594	660	0.731522		EHKQ	1.6	-9.53	594	649	0.222602
EHKR	1.88	-8.35	621	720	0.260738		EHKR	1.515	-10.57	621	672	0.635577
EHKT	2.133	-6.79	566	660	0.693776		EHKT	1.84	-9.01	566	660	0.781096
EHKV	2.063	-6.08	564	660	0.604663		EHKV	1.78	-8.3	564	660	0.411218
EHKY	2.035	-5.83	628	715	0.470825		EHKY	1.923	-8.05	628	780	0.385506
EHLA	1.664	-2.99	521	531	0.476203		EHLA	1.771	-5.21	521	540	0.659278
EHLD	1.504	-6.13	565	600	0.468746		EHLD	1.642	-8.35	565	340	0.468633
EHLE	1.453	-6.12	578	570	0.533046		EHLE	1.596	-8.34	578	590	0.274432
EHLF	1.888	-0.78	597	528	0.792352		EHLF	2.042	-3	597	720	0.438948
EHLG	1.797	-3.64	507	540	0.559552		EHLG	1.83	-5.86	507	540	0.428558
EHLH	1.856	-2.6	587	528	0.623938		EHLH	1.744	-7.04	587	720	0.484557
EHLI	1.899	-1.37	563	600	0.676405		EHLI	1.849	-3.59	563	600	0.626082
EHLK	2.052	-5.29	578	660	0.585008		EHLK	1.723	-7.51	578	649	0.278469
EHLL	1.946	-1.24	563	600	0.741314		EHLL	1.909	-3.46	563	600	0.815703
EHLN	1.871	-3.34	564	600	0.672391		EHLN	1.929	-5.56	564	600	0.646064
EHLQ	1.608	-3.26	579	580	0.58168		EHLQ	1.837	-5.48	579	580	0.641884
EHLR	2.011	-4.3	606	605	0.775603		EHLR	1.758	-6.52	606	660	0.318033
EHLT	1.869	-2.74	551	600	0.593538		EHLT	1.811	-4.96	551	350	0.647463
EHLV	1.93	-2.03	549	600	0.537352		EHLV	1.942	-4.25	549	600	0.71196
EHLY	2.111	-1.78	613	720	0.466031		EHLY	2.156	-4	613	720	0.675168
EHNA	1.642	-5.09	522	522	0.426013		EHNA	1.654	-7.31	522	504	0.331973
EHND	1.447	-8.23	566	600	0.217083		EHND	1.688	-10.45	566	600	0.655812
EHNE	1.436	-8.22	579	570	0.366331		EHNE	1.663	-10.44	579	600	0.544214
EHNF	1.911	-2.88	598	612	0.634017		EHNF	1.992	-5.1	598	660	0.488194
EHNG	1.721	-5.74	508	522	0.641879		EHNG	1.86	-7.96	508	540	0.389798
EHNH	1.956	-4.7	588	720	0.415047		EHNH	1.667	-9.14	588	684	0.271306
EHNI	1.946	-3.47	564	600	0.510675		EHNI	1.823	-5.69	564	520	0.609545
EHNK	1.904	-7.39	579	660	0.324003		EHNK	1.764	-9.61	579	660	0.100707
EHNL	1.922	-3.34	564	600	0.511974		EHNL	1.948	-5.56	564	600	0.563343
EHNN	1.814	-5.44	565	600	0.515436		EHNN	1.913	-7.66	565	600	0.668395
EHNQ	1.68	-5.36	580	590	0.625013		EHNQ	1.705	-7.58	580	490	0.757214
EHNR	1.995	-6.4	607	649	0.613268		EHNR	1.711	-8.62	607	660	0.292392
EHNT	1.879	-4.84	552	600	0.308717		EHNT	2.054	-7.06	552	600	0.399822
EHNV	1.866	-4.13	550	600	0.403553		EHNV	2.005	-6.35	550	600	0.720978
EHNY	1.968	-3.88	614	720	0.501896		EHNY	1.892	-6.1	614	540	0.513754
EHQA	1.623	-5.01	537	513	0.578586		EHQA	1.67	-7.23	537	486	0.523737
EHQD	1.313	-8.15	581	490	0.78393		EHQD	1.629	-10.37	581	580	0.360818
EHQE	1.328	-8.14	594	570	0.535019		EHQE	1.539	-10.36	594	580	0.259214
EHQF	1.945	-2.8	613	720	0.470198		EHQF	2.11	-5.02	613	720	0.375851
EHQG	1.644	-5.66	523	522	0.641762		EHQG	1.787	-7.88	523	540	0.620581
EHQH	1.773	-4.62	603	720	0.396956		EHQH	1.59	-9.06	603	696	0.441656
EHQI	1.76	-3.39	579	600	0.405697		EHQI	1.837	-5.61	579	600	0.479889
EHQK	1.974	-7.31	594	660	0.758482		EHQK	1.69	-9.53	594	649	0.166925
EHQL	1.799	-3.26	579	600	0.368361		EHQL	1.771	-5.48	579	600	0.463281
EHQN	1.76	-5.36	580	590	0.375907		EHQN	1.776	-7.58	580	590	0.706591
EHQQ	1.461	-5.28	595	500	0.600541		EHQQ	1.835	-7.5	595	600	0.277956
EHQR	2.052	-6.32	622	660	0.393718		EHQR	1.567	-8.54	622	352	0.603426
EHQT	1.832	-4.76	567	600	0.479004		EHQT	2.058	-6.98	567	590	0.643035
EHQV	1.87	-4.05	565	600	0.676436		EHQV	1.833	-6.27	565	600	0.578089
EHQY	1.868	-3.8	629	708	0.588091		EHQY	1.757	-6.02	629	720	0.491387
EHRA	1.902	-6.05	564	600	0.515701		EHRA	1.583	-8.27	564	590	0.533974
EHRD	1.769	-9.19	608	660	0.596219		EHRD	1.859	-11.41	608	649	0.331123
EHRE	1.727	-9.18	621	660	0.174418		EHRE	1.805	-11.4	621	660	0.361459
EHRF	2.216	-3.84	640	780	0.61814		EHRF	1.918	-6.06	640	780	0.278381
EHRG	1.908	-6.7	550	600	0.522163		EHRG	1.589	-8.92	550	600	0.303763
EHRH	2.117	-5.66	630	780	0.27843		EHRH	1.464	-10.1	630	767	0.356898
EHRI	2.081	-4.43	606	660	0.378966		EHRI	1.731	-6.65	606	660	0.590339
EHRK	1.922	-8.35	621	720	0.197861		EHRK	1.465	-10.57	621	588	0.480479
EHRL	2.022	-4.3	606	660	0.444562		EHRL	1.778	-6.52	606	660	0.386704
EHRN	2.06	-6.4	607	649	0.583101		EHRN	1.732	-8.62	607	649	0.289559
EHRQ	1.864	-6.32	622	660	0.379899		EHRQ	1.671	-8.54	622	660	0.484922
EHRR	1.872	-7.36	649	720	0.574531		EHRR	1.53	-9.58	649	720	0.460125
EHRT	2.034	-5.8	594	660	0.555757		EHRT	1.839	-8.02	594	660	0.4989
EHRV	1.936	-5.09	592	484	0.689353		EHRV	1.836	-7.31	592	660	0.700701
EHRY	2.253	-4.84	656	780	0.648615		EHRY	1.927	-7.06	656	780	0.396408
EHTA	1.739	-4.49	509	522	0.261568		EHTA	1.777	-6.71	509	540	0.547165
EHTD	1.475	-7.63	553	590	0.34261		EHTD	1.769	-9.85	553	600	0.46046
EHTE	1.497	-7.62	566	590	0.243069		EHTE	1.664	-9.84	566	600	0.216706
EHTF	2.182	-2.28	585	720	0.763322		EHTF	2.004	-4.5	585	720	0.366658
EHTG	1.673	-5.14	495	468	0.36657		EHTG	1.847	-7.36	495	531	0.441104
EHTH	2.044	-4.1	575	720	0.298354		EHTH	1.717	-8.54	575	672	0.187434
EHTI	1.703	-2.87	551	480	0.799903		EHTI	1.972	-5.09	551	600	0.424657
EHTK	2.016	-6.79	566	660	0.557081		EHTK	1.814	-9.01	566	660	0.30647
EHTL	1.963	-2.74	551	600	0.727371		EHTL	1.952	-4.96	551	600	0.632674
EHTN	1.897	-4.84	552	600	0.535442		EHTN	1.816	-7.06	552	450	0.551424
EHTQ	1.643	-4.76	567	590	0.321564		EHTQ	1.841	-6.98	567	600	0.564694
EHTR	2.045	-5.8	594	660	0.784649		EHTR	1.75	-8.02	594	660	0.402494
EHTT	1.922	-4.24	539	600	0.642137		EHTT	2.041	-6.46	539	600	0.340115
EHTV	1.93	-3.53	537	600	0.501302		EHTV	1.793	-5.75	537	490	0.526745
EHTY	1.917	-3.28	601	696	0.631202		EHTY	2.001	-5.5	601	720	0.346714
EHVA	1.698	-3.78	507	540	0.346229		EHVA	1.703	-6	507	540	0.361172
EHVD	1.587	-6.92	551	590	0.481459		EHVD	1.743	-9.14	551	600	0.325712
EHVE	1.476	-6.91	564	580	0.490939		EHVE	1.704	-9.13	564	600	0.538861
EHVF	2.171	-1.57	583	720	0.766095		EHVF	2.121	-3.79	583	720	0.493358
EHVG	1.632	-4.43	493	315	0.653242		EHVG	1.789	-6.65	493	540	0.383324
EHVH	1.866	-3.39	573	384	0.603665		EHVH	1.637	-7.83	573	720	0.153378
EHVI	1.908	-2.16	549	600	0.727378		EHVI	1.774	-4.38	549	500	0.774761
EHVK	2.021	-6.08	564	660	0.361715		EHVK	1.895	-8.3	564	660	0.570925
EHVL	1.734	-2.03	549	500	0.615771		EHVL	1.746	-4.25	549	320	0.805034
EHVN	1.787	-4.13	550	600	0.219503		EHVN	1.956	-6.35	550	600	0.33655
EHVQ	1.61	-4.05	565	600	0.378136		EHVQ	1.837	-6.27	565	600	0.714093
EHVR	2.091	-5.09	592	660	0.574844		EHVR	1.773	-7.31	592	660	0.5297
EHVT	1.971	-3.53	537	600	0.370734		EHVT	1.873	-5.75	537	600	0.340186
EHVV	1.995	-2.82	535	600	0.733594		EHVV	1.958	-5.04	535	600	0.517115
EHVY	2.248	-2.57	599	720	0.612787		EHVY	2.153	-4.79	599	720	0.560426
EHYA	2.002	-3.53	571	660	0.658892		EHYA	1.932	-5.75	571	561	0.477189
EHYD	1.705	-6.67	615	720	0.552586		EHYD	1.784	-8.89	615	720	0.273304
EHYE	1.551	-6.66	628	720	0.369014		EHYE	1.761	-8.88	628	720	0.696766
EHYF	2.039	-1.32	647	644	0.403359		EHYF	2.21	-3.54	647	840	0.513014
EHYG	2.016	-4.18	557	660	0.399339		EHYG	1.936	-6.4	557	605	0.589137
EHYH	2.042	-3.14	637	826	0.236258		EHYH	1.824	-7.58	637	826	0.390447
EHYI	2.157	-1.91	613	720	0.480904		EHYI	1.979	-4.13	613	516	0.801056
EHYK	2.266	-5.83	628	780	0.610834		EHYK	1.932	-8.05	628	780	0.466042
EHYL	2.145	-1.78	613	720	0.78151		EHYL	2.172	-4	613	720	0.548736
EHYN	1.963	-3.88	614	696	0.45987		EHYN	2.105	-6.1	614	720	0.579257
EHYQ	1.812	-3.8	629	720	0.454321		EHYQ	1.819	-6.02	629	720	0.215257
EHYR	2.248	-4.84	656	780	0.443006		EHYR	1.921	-7.06	656	780	0.230111
EHYT	2.21	-3.28	601	720	0.61485		EHYT	2.061	-5.5	601	720	0.687791
EHYV	2.127	-2.57	599	720	0.70793		EHYV	1.975	-4.79	599	408	0.791489
EHYY	2.156	-2.32	663	840	0.304674		EHYY	2.12	-4.54	663	434	0.542654
EIAH	1.937	-3.12	521	540	0.828732		EIAH	1.965	-5.34	521	540	0.634637
EIDH	1.635	-6.26	565	600	0.503853		EIDH	1.719	-8.48	565	460	0.303606
EIEH	1.565	-6.25	578	600	0.338151		EIEH	1.901	-8.47	578	600	0.770367
EIFH	2.165	-0.91	597	720	0.514372		EIFH	2.287	-3.13	597	720	0.64591
EIGH	1.791	-3.77	507	531	0.364864		EIGH	1.964	-5.99	507	540	0.908551
EIHA	1.825	-3.12	521	540	0.661412		EIHA	1.778	-5.34	521	540	0.672452
EIHD	1.511	-6.26	565	600	0.438889		EIHD	1.806	-8.48	565	590	0.717806
EIHE	1.519	-6.25	578	560	0.531411		EIHE	1.606	-8.47	578	580	0.249158
EIHF	2.111	-0.91	597	720	0.564477		EIHF	2.218	-3.13	597	720	0.628871
EIHG	1.81	-3.77	507	540	0.607481		EIHG	1.679	-5.99	507	396	0.67494
EIHH	1.875	-2.73	587	456	0.616762		EIHH	1.7	-7.17	587	576	0.103597
EIHI	1.856	-1.5	563	600	0.865625		EIHI	1.948	-3.72	563	600	0.647956
EIHK	2.078	-5.42	578	660	0.45886		EIHK	1.845	-7.64	578	660	0.268344
EIHL	1.901	-1.37	563	600	0.65917		EIHL	1.959	-3.59	563	600	0.632646
EIHN	2.048	-3.47	564	600	0.446716		EIHN	1.934	-5.69	564	600	0.753775
EIHQ	1.81	-3.39	579	600	0.665021		EIHQ	1.666	-5.61	579	390	0.418134
EIHR	2.116	-4.43	606	660	0.57658		EIHR	1.917	-6.65	606	660	0.38021
EIHT	2.014	-2.87	551	600	0.66876		EIHT	2.04	-5.09	551	600	0.551478
EIHV	1.981	-2.16	549	600	0.758171		EIHV	1.912	-4.38	549	600	0.426558
EIHY	2.159	-1.91	613	720	0.770904		EIHY	2.247	-4.13	613	720	0.329981
EIIH	1.876	-1.5	563	600	0.612727		EIIH	1.977	-3.72	563	600	0.483461
EIKH	2.078	-5.42	578	660	0.682773		EIKH	1.77	-7.64	578	660	0.411688
EILH	1.93	-1.37	563	600	0.509472		EILH	1.877	-3.59	563	600	0.375127
EINH	1.955	-3.47	564	600	0.738299		EINH	1.924	-5.69	564	600	0.508015
EIQH	1.735	-3.39	579	600	0.72488		EIQH	1.822	-5.61	579	460	0.757271
EIRH	1.913	-4.43	606	561	0.605989		EIRH	1.916	-6.65	606	660	0.785571
EITH	1.961	-2.87	551	600	0.892734		EITH	2.032	-5.09	551	600	0.672371
EIVH	1.967	-2.16	549	600	0.919242		EIVH	1.995	-4.38	549	600	0.665033
EIYH	2.04	-1.91	613	720	0.487607		EIYH	2.061	-4.13	613	648	0.452819
EKAH	1.97	-7.04	536	600	0.644953		EKAH	1.616	-9.26	536	600	0.237927
EKDH	1.864	-10.18	580	660	0.399884		EKDH	1.886	-12.4	580	660	0.258151
EKEH	1.793	-10.17	593	649	0.362264		EKEH	1.872	-12.39	593	660	0.517512
EKFH	2.239	-4.83	612	780	0.494026		EKFH	2.041	-7.05	612	780	0.348826
EKGH	1.949	-7.69	522	600	0.332777		EKGH	1.77	-9.91	522	600	0.690098
EKHA	1.987	-7.04	536	600	0.76319		EKHA	1.568	-9.26	536	510	0.317822
EKHD	1.842	-10.18	580	660	0.115304		EKHD	1.998	-12.4	580	660	0.469737
EKHE	1.669	-10.17	593	660	0.51529		EKHE	1.768	-12.39	593	660	0.750091
EKHF	2.259	-4.83	612	780	0.607919		EKHF	2.024	-7.05	612	780	0.557317
EKHG	1.918	-7.69	522	600	0.44135		EKHG	1.686	-9.91	522	600	0.366457
EKHH	2	-6.65	602	572	0.385233		EKHH	1.497	-11.09	602	767	0.156094
EKHI	2.108	-5.42	578	660	0.594949		EKHI	1.729	-7.64	578	660	0.338679
EKHK	1.942	-9.34	593	720	0.36454		EKHK	1.458	-11.56	593	384	0.356469
EKHL	2.161	-5.29	578	660	0.516134		EKHL	1.846	-7.51	578	660	0.329501
EKHN	2.109	-7.39	579	660	0.593077		EKHN	1.626	-9.61	579	660	0.441475
EKHQ	1.972	-7.31	594	660	0.643449		EKHQ	1.684	-9.53	594	649	0.530631
EKHR	1.93	-8.35	621	720	0.329873		EKHR	1.428	-10.57	621	552	0.264146
EKHT	2.156	-6.79	566	660	0.518208		EKHT	1.817	-9.01	566	660	0.484264
EKHV	2.158	-6.08	564	660	0.717345		EKHV	1.848	-8.3	564	660	0.329827
EKHY	2.262	-5.83	628	780	0.439979		EKHY	1.977	-8.05	628	780	0.282659
EKIH	1.969	-5.42	578	660	0.278331		EKIH	1.954	-7.64	578	660	0.398591
EKKH	1.858	-9.34	593	720	0.404859		EKKH	1.514	-11.56	593	684	0.299678
EKLH	2.036	-5.29	578	660	0.453722		EKLH	1.717	-7.51	578	605	0.2414
EKNH	2.006	-7.39	579	660	0.406747		EKNH	1.746	-9.61	579	649	0.193057
EKQH	2.05	-7.31	594	660	0.653467		EKQH	1.623	-9.53	594	660	0.229797
EKRH	1.893	-8.35	621	720	0.230729		EKRH	1.463	-10.57	621	684	0.566507
EKTH	1.972	-6.79	566	660	0.47901		EKTH	1.761	-9.01	566	660	0.344377
EKVH	1.981	-6.08	564	660	0.58251		EKVH	1.859	-8.3	564	660	0.380723
EKYH	2.279	-5.83	628	780	0.691391		EKYH	1.97	-8.05	628	780	0.203033
ELAH	1.865	-2.99	521	540	0.719526		ELAH	1.977	-5.21	521	540	0.602411
ELDH	1.682	-6.13	565	590	0.712855		ELDH	1.842	-8.35	565	600	0.42087
ELEH	1.631	-6.12	578	600	0.6038		ELEH	1.771	-8.34	578	600	0.627644
ELFH	2.081	-0.78	597	720	0.622463		ELFH	2.245	-3	597	720	0.464555
ELGH	1.91	-3.64	507	540	0.856506		ELGH	1.755	-5.86	507	369	0.678844
ELHA	1.799	-2.99	521	540	0.656766		ELHA	1.804	-5.21	521	540	0.440372
ELHD	1.542	-6.13	565	600	0.608307		ELHD	1.719	-8.35	565	580	0.598448
ELHE	1.384	-6.12	578	290	0.323829		ELHE	1.658	-8.34	578	590	0.24368
ELHF	2.085	-0.78	597	720	0.493717		ELHF	1.907	-3	597	384	0.78247
ELHG	1.775	-3.64	507	531	0.372968		ELHG	1.918	-5.86	507	540	0.632098
ELHH	2.136	-2.6	587	720	0.563916		ELHH	1.803	-7.04	587	720	0.315532
ELHI	1.879	-1.37	563	600	0.619873		ELHI	1.921	-3.59	563	600	0.562134
ELHK	2.121	-5.29	578	660	0.510551		ELHK	1.714	-7.51	578	451	0.365204
ELHL	1.749	-1.24	563	340	0.827903		ELHL	1.887	-3.46	563	600	0.576444
ELHN	1.841	-3.34	564	600	0.506752		ELHN	1.886	-5.56	564	590	0.471477
ELHQ	1.657	-3.26	579	560	0.751376		ELHQ	1.879	-5.48	579	600	0.282213
ELHR	2.095	-4.3	606	660	0.484973		ELHR	1.77	-6.52	606	660	0.702871
ELHT	2.021	-2.74	551	600	0.802471		ELHT	2.049	-4.96	551	600	0.591271
ELHV	1.985	-2.03	549	600	0.468188		ELHV	1.951	-4.25	549	600	0.646742
ELHY	2.17	-1.78	613	720	0.486515		ELHY	2.135	-4	613	720	0.648144
ELIH	1.933	-1.37	563	600	0.592805		ELIH	1.877	-3.59	563	530	0.309027
ELKH	2.139	-5.29	578	660	0.750613		ELKH	1.741	-7.51	578	374	0.632172
ELLH	1.978	-1.24	563	600	0.680621		ELLH	1.915	-3.46	563	600	0.479689
ELNH	1.867	-3.34	564	590	0.317206		ELNH	1.98	-5.56	564	600	0.492896
ELQH	1.699	-3.26	579	600	0.572457		ELQH	1.89	-5.48	579	600	0.499995
ELRH	2.197	-4.3	606	660	0.639871		ELRH	1.705	-6.52	606	451	0.632036
ELTH	1.926	-2.74	551	600	0.566834		ELTH	2.05	-4.96	551	600	0.74243
ELVH	1.912	-2.03	549	600	0.639528		ELVH	1.995	-4.25	549	600	0.70157
ELYH	1.995	-1.78	613	720	0.357778		ELYH	2.207	-4	613	720	0.342367
ENAH	1.82	-5.09	522	531	0.356065		ENAH	1.917	-7.31	522	531	0.492167
ENDH	1.556	-8.23	566	590	0.199953		ENDH	1.739	-10.45	566	600	0.51368
ENEH	1.494	-8.22	579	540	0.347777		ENEH	1.723	-10.44	579	600	0.294473
ENFH	2.021	-2.88	598	708	0.470673		ENFH	2.022	-5.1	598	684	0.507752
ENGH	1.722	-5.74	508	405	0.740111		ENGH	1.931	-7.96	508	540	0.327865
ENHA	1.664	-5.09	522	468	0.331876		ENHA	1.699	-7.31	522	540	0.573857
ENHD	1.473	-8.23	566	590	0.252329		ENHD	1.757	-10.45	566	590	0.0802856
ENHE	1.402	-8.22	579	520	0.410562		ENHE	1.592	-10.44	579	600	0.159107
ENHF	2.116	-2.88	598	720	0.424604		ENHF	2.209	-5.1	598	720	0.580209
ENHG	1.668	-5.74	508	288	0.664407		ENHG	1.822	-7.96	508	540	0.372034
ENHH	1.887	-4.7	588	420	0.338642		ENHH	1.783	-9.14	588	708	0.462071
ENHI	1.937	-3.47	564	600	0.569539		ENHI	1.872	-5.69	564	400	0.773177
ENHK	2.127	-7.39	579	660	0.37974		ENHK	1.708	-9.61	579	660	0.532625
ENHL	1.817	-3.34	564	480	0.64183		ENHL	1.961	-5.56	564	600	0.503884
ENHN	1.795	-5.44	565	430	0.413849		ENHN	1.848	-7.66	565	580	0.597064
ENHQ	1.714	-5.36	580	590	0.698873		ENHQ	1.819	-7.58	580	590	0.479518
ENHR	2.027	-6.4	607	660	0.243942		ENHR	1.819	-8.62	607	660	0.307133
ENHT	1.779	-4.84	552	350	0.768653		ENHT	1.996	-7.06	552	600	0.670929
ENHV	1.932	-4.13	550	600	0.528379		ENHV	2.007	-6.35	550	600	0.432689
ENHY	2.085	-3.88	614	720	0.256692		ENHY	2.123	-6.1	614	720	0.468385
ENIH	1.975	-3.47	564	600	0.532684		ENIH	1.833	-5.69	564	480	0.603794
ENKH	1.929	-7.39	579	363	0.643604		ENKH	1.712	-9.61	579	660	0.477182
ENLH	1.957	-3.34	564	600	0.504351		ENLH	1.925	-5.56	564	600	0.335035
ENNH	1.821	-5.44	565	500	0.82711		ENNH	1.97	-7.66	565	600	0.335211
ENQH	1.674	-5.36	580	410	0.6433		ENQH	1.915	-7.58	580	600	0.567118
ENRH	1.875	-6.4	607	495	0.582693		ENRH	1.643	-8.62	607	660	0.593574
ENTH	1.829	-4.84	552	430	0.533568		ENTH	2.035	-7.06	552	600	0.292326
ENVH	1.842	-4.13	550	600	0.494296		ENVH	1.923	-6.35	550	590	0.313939
ENYH	2.029	-3.88	614	720	0.435235		ENYH	2.05	-6.1	614	720	0.400237
EQAH	1.686	-5.01	537	540	0.481399		EQAH	1.88	-7.23	537	540	0.696733
EQDH	1.429	-8.15	581	570	0.443321		EQDH	1.704	-10.37	581	590	0.668879
EQEH	1.424	-8.14	594	340	0.52366		EQEH	1.694	-10.36	594	590	0.58421
EQFH	1.988	-2.8	613	720	0.357248		EQFH	2.101	-5.02	613	720	0.486599
EQGH	1.773	-5.66	523	540	0.498479		EQGH	1.965	-7.88	523	540	0.449528
EQHA	1.641	-5.01	537	504	0.677649		EQHA	1.582	-7.23	537	504	0.81203
EQHD	1.486	-8.15	581	600	0.736306		EQHD	1.704	-10.37	581	600	0.464917
EQHE	1.437	-8.14	594	410	0.539452		EQHE	1.616	-10.36	594	600	0.50751
EQHF	2.029	-2.8	613	696	0.395549		EQHF	2.057	-5.02	613	708	0.494045
EQHG	1.672	-5.66	523	522	0.478135		EQHG	1.769	-7.88	523	522	0.68448
EQHH	1.911	-4.62	603	720	0.763973		EQHH	1.622	-9.06	603	696	0.484692
EQHI	1.95	-3.39	579	600	0.451742		EQHI	1.94	-5.61	579	600	0.533084
EQHK	2.037	-7.31	594	660	0.378502		EQHK	1.7	-9.53	594	649	0.762183
EQHL	1.945	-3.26	579	600	0.477049		EQHL	1.865	-5.48	579	600	0.416307
EQHN	1.848	-5.36	580	430	0.605633		EQHN	1.946	-7.58	580	590	0.587902
EQHQ	1.542	-5.28	595	490	0.608002		EQHQ	1.678	-7.5	595	600	0.814857
EQHR	2.099	-6.32	622	660	0.547593		EQHR	1.794	-8.54	622	649	0.68455
EQHT	1.883	-4.76	567	600	0.767153		EQHT	1.984	-6.98	567	600	0.520048
EQHV	1.771	-4.05	565	330	0.699249		EQHV	2.025	-6.27	565	600	0.298115
EQHY	2.058	-3.8	629	720	0.414872		EQHY	1.968	-6.02	629	720	0.282877
EQIH	1.842	-3.39	579	600	0.557298		EQIH	1.894	-5.61	579	600	0.238347
EQKH	1.997	-7.31	594	660	0.697653		EQKH	1.713	-9.53	594	583	0.702501
EQLH	1.825	-3.26	579	600	0.353211		EQLH	1.81	-5.48	579	600	0.193396
EQNH	1.829	-5.36	580	600	0.385012		EQNH	2.005	-7.58	580	600	0.607301
EQQH	1.618	-5.28	595	580	0.560969		EQQH	1.866	-7.5	595	580	0.724465
EQRH	2.053	-6.32	622	660	0.484429		EQRH	1.762	-8.54	622	660	0.613931
EQTH	1.923	-4.76	567	600	0.74027		EQTH	1.955	-6.98	567	600	0.427934
EQVH	1.836	-4.05	565	600	0.280545		EQVH	1.935	-6.27	565	600	0.397313
EQYH	1.885	-3.8	629	708	0.591885		EQYH	2.113	-6.02	629	720	0.597138
ERAH	1.9	-6.05	564	600	0.642381		ERAH	1.632	-8.27	564	350	0.612927
ERDH	1.822	-9.19	608	660	0.421707		ERDH	1.952	-11.41	608	660	0.30268
EREH	1.911	-9.18	621	660	0.369872		EREH	1.783	-11.4	621	660	0.530847
ERFH	2.144	-3.84	640	780	0.356041		ERFH	2.021	-6.06	640	780	0.327142
ERGH	1.825	-6.7	550	440	0.751897		ERGH	1.758	-8.92	550	600	0.311321
ERHA	1.875	-6.05	564	600	0.332419		ERHA	1.615	-8.27	564	590	0.639135
ERHD	1.744	-9.19	608	660	0.419081		ERHD	1.925	-11.41	608	660	0.614494
ERHE	1.831	-9.18	621	649	0.420071		ERHE	1.719	-11.4	621	649	0.274376
ERHF	2.21	-3.84	640	780	0.311854		ERHF	1.989	-6.06	640	650	0.46467
ERHG	1.948	-6.7	550	600	0.695642		ERHG	1.657	-8.92	550	600	0.751925
ERHH	2.079	-5.66	630	780	0.482234		ERHH	1.517	-10.1	630	442	0.481527
ERHI	1.991	-4.43	606	660	0.425675		ERHI	1.729	-6.65	606	550	0.410297
ERHK	1.941	-8.35	621	720	0.564553		ERHK	1.463	-10.57	621	708	0.237449
ERHL	1.937	-4.3	606	660	0.329234		ERHL	1.853	-6.52	606	660	0.363589
ERHN	2.084	-6.4	607	660	0.632224		ERHN	1.608	-8.62	607	627	0.158827
ERHQ	1.909	-6.32	622	660	0.532133		ERHQ	1.663	-8.54	622	649	0.299984
ERHR	1.887	-7.36	649	720	0.250487		ERHR	1.507	-9.58	649	696	0.465045
ERHT	2.042	-5.8	594	649	0.59523		ERHT	1.816	-8.02	594	660	0.77642
ERHV	2.146	-5.09	592	660	0.74098		ERHV	1.863	-7.31	592	660	0.342709
ERHY	2.259	-4.84	656	780	0.344614		ERHY	1.918	-7.06	656	780	0.649268
ERIH	1.972	-4.43	606	660	0.238186		ERIH	1.787	-6.65	606	660	0.303669
ERKH	1.791	-8.35	621	720	0.561445		ERKH	1.503	-10.57	621	720	0.400811
ERLH	2.048	-4.3	606	660	0.337578		ERLH	1.865	-6.52	606	660	0.23476
ERNH	1.926	-6.4	607	660	0.469893		ERNH	1.708	-8.62	607	473	0.594703
ERQH	1.904	-6.32	622	660	0.414677		ERQH	1.709	-8.54	622	627	0.660576
ERRH	1.858	-7.36	649	588	0.406488		ERRH	1.561	-9.58	649	684	0.499202
ERTH	1.824	-5.8	594	506	0.498873		ERTH	1.747	-8.02	594	660	0.364496
ERVH	1.854	-5.09	592	429	0.666517		ERVH	1.763	-7.31	592	660	0.234684
ERYH	2.08	-4.84	656	780	0.570688		ERYH	1.835	-7.06	656	780	0.245613
ETAH	1.828	-4.49	509	540	0.556856		ETAH	2.013	-6.71	509	531	0.682186
ETDH	1.601	-7.63	553	600	0.575142		ETDH	1.876	-9.85	553	600	0.310832
ETEH	1.578	-7.62	566	600	0.630673		ETEH	1.849	-9.84	566	600	0.748585
ETFH	1.994	-2.28	585	720	0.262212		ETFH	2.033	-4.5	585	720	0.476978
ETGH	1.962	-5.14	495	540	0.672791		ETGH	1.963	-7.36	495	540	0.336468
ETHA	1.903	-4.49	509	540	0.629271		ETHA	1.87	-6.71	509	540	0.578338
ETHD	1.569	-7.63	553	590	0.557259		ETHD	1.745	-9.85	553	590	0.194411
ETHE	1.484	-7.62	566	580	0.122661		ETHE	1.841	-9.84	566	600	0.507433
ETHF	2.221	-2.28	585	720	0.433723		ETHF	2.239	-4.5	585	720	0.463172
ETHG	1.643	-5.14	495	369	0.514123		ETHG	1.742	-7.36	495	378	0.615725
ETHH	1.965	-4.1	575	720	0.4974		ETHH	1.807	-8.54	575	720	0.267189
ETHI	1.982	-2.87	551	600	0.435785		ETHI	1.892	-5.09	551	340	0.807831
ETHK	2.092	-6.79	566	660	0.542333		ETHK	1.728	-9.01	566	660	0.339995
ETHL	1.948	-2.74	551	600	0.556507		ETHL	2.087	-4.96	551	600	0.685263
ETHN	2	-4.84	552	600	0.32632		ETHN	1.951	-7.06	552	600	0.434351
ETHQ	1.717	-4.76	567	580	0.59881		ETHQ	1.857	-6.98	567	600	0.423165
ETHR	1.984	-5.8	594	418	0.697518		ETHR	1.837	-8.02	594	660	0.338334
ETHT	1.971	-4.24	539	600	0.505943		ETHT	2.058	-6.46	539	600	0.281628
ETHV	1.937	-3.53	537	600	0.508291		ETHV	2.012	-5.75	537	600	0.647124
ETHY	2.143	-3.28	601	720	0.626999		ETHY	2.003	-5.5	601	432	0.608545
ETIH	1.834	-2.87	551	450	0.786633		ETIH	1.978	-5.09	551	600	0.713839
ETKH	2.052	-6.79	566	660	0.401623		ETKH	1.884	-9.01	566	660	0.367129
ETLH	1.932	-2.74	551	600	0.382824		ETLH	1.865	-4.96	551	470	0.619689
ETNH	1.871	-4.84	552	600	0.227582		ETNH	2.03	-7.06	552	600	0.351915
ETQH	1.843	-4.76	567	590	0.370967		ETQH	2.078	-6.98	567	600	0.715086
ETRH	1.934	-5.8	594	572	0.373736		ETRH	1.743	-8.02	594	363	0.646124
ETTH	2.039	-4.24	539	600	0.471271		ETTH	1.883	-6.46	539	350	0.48748
ETVH	1.968	-3.53	537	600	0.442407		ETVH	1.915	-5.75	537	430	0.603728
ETYH	2.088	-3.28	601	720	0.683879		ETYH	2.052	-5.5	601	720	0.658725
EVAH	1.915	-3.78	507	540	0.639992		EVAH	1.938	-6	507	531	0.674873
EVDH	1.548	-6.92	551	600	0.0706581		EVDH	1.792	-9.14	551	420	0.69832
EVEH	1.625	-6.91	564	600	0.397795		EVEH	1.756	-9.13	564	590	0.57563
EVFH	2.152	-1.57	583	720	0.669418		EVFH	2.119	-3.79	583	720	0.340324
EVGH	1.957	-4.43	493	540	0.681769		EVGH	1.938	-6.65	493	540	0.496971
EVHA	1.688	-3.78	507	297	0.597939		EVHA	1.676	-6	507	450	0.403038
EVHD	1.549	-6.92	551	580	0.585426		EVHD	1.842	-9.14	551	600	0.712877
EVHE	1.506	-6.91	564	570	0.600345		EVHE	1.708	-9.13	564	590	0.152747
EVHF	2.208	-1.57	583	720	0.543317		EVHF	2.216	-3.79	583	720	0.682307
EVHG	1.73	-4.43	493	396	0.496418		EVHG	1.868	-6.65	493	540	0.691711
EVHH	1.908	-3.39	573	720	0.173426		EVHH	1.741	-7.83	573	372	0.263323
EVHI	1.919	-2.16	549	600	0.769637		EVHI	2.018	-4.38	549	600	0.489379
EVHK	2.132	-6.08	564	660	0.385355		EVHK	1.868	-8.3	564	660	0.340511
EVHL	1.982	-2.03	549	600	0.777471		EVHL	1.919	-4.25	549	430	0.773779
EVHN	1.975	-4.13	550	590	0.596003		EVHN	1.937	-6.35	550	600	0.44461
EVHQ	1.805	-4.05	565	600	0.594487		EVHQ	1.931	-6.27	565	600	0.664651
EVHR	2.085	-5.09	592	660	0.467326		EVHR	1.821	-7.31	592	660	0.280609
EVHT	1.975	-3.53	537	590	0.624376		EVHT	2.03	-5.75	537	600	0.502365
EVHV	1.982	-2.82	535	590	0.758476		EVHV	1.924	-5.04	535	600	0.274627
EVHY	2.116	-2.57	599	720	0.320704		EVHY	2.129	-4.79	599	720	0.374466
EVIH	2.022	-2.16	549	600	0.777499		EVIH	1.999	-4.38	549	600	0.398963
EVKH	2.032	-6.08	564	660	0.447843		EVKH	1.919	-8.3	564	649	0.803337
EVLH	2.02	-2.03	549	600	0.720978		EVLH	1.98	-4.25	549	600	0.494372
EVNH	1.969	-4.13	550	600	0.702582		EVNH	2.032	-6.35	550	600	0.42441
EVQH	1.762	-4.05	565	600	0.414141		EVQH	1.907	-6.27	565	600	0.415942
EVRH	2.149	-5.09	592	660	0.533886		EVRH	1.892	-7.31	592	660	0.512992
EVTH	1.986	-3.53	537	600	0.499813		EVTH	2.054	-5.75	537	600	0.508118
EVVH	1.925	-2.82	535	550	0.848179		EVVH	2.032	-5.04	535	600	0.515618
EVYH	2.118	-2.57	599	720	0.69544		EVYH	2.111	-4.79	599	720	0.274572
EYAH	1.987	-3.53	571	660	0.638361		EYAH	1.967	-5.75	571	660	0.514671
EYDH	1.695	-6.67	615	720	0.580941		EYDH	1.831	-8.89	615	720	0.671273
EYEH	1.658	-6.66	628	720	0.3688		EYEH	1.794	-8.88	628	720	0.388028
EYFH	2.165	-1.32	647	840	0.442441		EYFH	2.176	-3.54	647	840	0.268785
EYGH	1.898	-4.18	557	660	0.472402		EYGH	1.909	-6.4	557	660	0.540475
EYHA	1.848	-3.53	571	660	0.253082		EYHA	1.9	-5.75	571	561	0.427051
EYHD	1.681	-6.67	615	720	0.415209		EYHD	1.835	-8.89	615	720	0.417629
EYHE	1.566	-6.66	628	576	0.388088		EYHE	1.819	-8.88	628	720	0.334519
EYHF	2.279	-1.32	647	840	0.318228		EYHF	2.287	-3.54	647	840	0.353024
EYHG	1.94	-4.18	557	660	0.351332		EYHG	2.087	-6.4	557	660	0.582725
EYHH	2.018	-3.14	637	840	0.235777		EYHH	1.711	-7.58	637	840	0.383301
EYHI	2.164	-1.91	613	720	0.77201		EYHI	2.118	-4.13	613	720	0.416011
EYHK	2.223	-5.83	628	780	0.460689		EYHK	1.94	-8.05	628	780	0.201753
EYHL	2.035	-1.78	613	720	0.301584		EYHL	2.207	-4	613	720	0.547785
EYHN	1.976	-3.88	614	720	0.483611		EYHN	1.851	-6.1	614	636	0.349318
EYHQ	1.768	-3.8	629	720	0.345855		EYHQ	2.011	-6.02	629	720	0.888258
EYHR	2.191	-4.84	656	780	0.430059		EYHR	1.922	-7.06	656	780	0.759644
EYHT	2.036	-3.28	601	720	0.377431		EYHT	2.042	-5.5	601	492	0.529054
EYHV	2.034	-2.57	599	720	0.444064		EYHV	2.01	-4.79	599	576	0.578377
EYHY	1.944	-2.32	663	560	0.461946		EYHY	2.337	-4.54	663	840	0.427303
EYIH	2.011	-1.91	613	720	0.430582		EYIH	1.978	-4.13	613	720	0.355077
EYKH	2.101	-5.83	628	780	0.461152		EYKH	1.949	-8.05	628	780	0.265453
EYLH	2.042	-1.78	613	720	0.489773		EYLH	2.15	-4	613	720	0.678985
EYNH	1.873	-3.88	614	720	0.339774		EYNH	2.062	-6.1	614	720	0.634503
EYQH	1.829	-3.8	629	720	0.715394		EYQH	1.882	-6.02	629	600	0.534928
EYRH	2.177	-4.84	656	780	0.624		EYRH	1.762	-7.06	656	780	0.402596
EYTH	1.999	-3.28	601	684	0.528425		EYTH	1.913	-5.5	601	720	0.209027
EYVH	1.965	-2.57	599	720	0.515912		EYVH	2.073	-4.79	599	720	0.28831
EYYH	2.135	-2.32	663	840	0.595641		EYYH	2.04	-4.54	663	840	0.19994
FAAH	2.186	0.6	498	600	0.873124		FAAH	1.919	-1.62	498	600	0.867795
FADH	1.89	-2.54	542	660	0.531079		FADH	2.012	-4.76	542	660	0.774353
FAEH	1.939	-2.53	555	660	0.79123		FAEH	2.059	-4.75	555	660	0.573915
FAFH	2.262	2.81	574	780	0.597331		FAFH	2.135	0.59	574	780	0.679244
FAGH	2.177	-0.05	484	600	0.87442		FAGH	1.972	-2.27	484	600	0.867121
FAHA	2.04	0.6	498	600	0.753937		FAHA	1.699	-1.62	498	560	0.773857
FAHD	2.026	-2.54	542	660	0.511739		FAHD	2.087	-4.76	542	660	0.515334
FAHE	1.971	-2.53	555	660	0.673032		FAHE	2.062	-4.75	555	660	0.744818
FAHF	2.365	2.81	574	780	0.534572		FAHF	2.347	0.59	574	780	0.8614
FAHG	1.947	-0.05	484	600	0.675831		FAHG	1.841	-2.27	484	600	0.672773
FAHH	2.003	0.99	564	533	0.708451		FAHH	1.551	-3.45	564	299	0.689441
FAHI	2.158	2.22	540	660	0.778387		FAHI	1.871	0	540	660	0.709318
FAHK	2.142	-1.7	555	720	0.783192		FAHK	1.786	-3.92	555	720	0.625465
FAHL	2.091	2.35	540	660	0.832602		FAHL	2.059	0.13	540	660	0.48551
FAHN	2.093	0.25	541	660	0.593072		FAHN	1.767	-1.97	541	583	0.477328
FAHQ	2.047	0.33	556	660	0.667178		FAHQ	1.742	-1.89	556	550	0.877989
FAHR	2.04	-0.71	583	720	0.549145		FAHR	1.675	-2.93	583	660	0.441638
FAHT	2.139	0.85	528	660	0.828078		FAHT	1.977	-1.37	528	660	0.782445
FAHV	2.104	1.56	526	660	0.770993		FAHV	1.958	-0.66	526	660	0.599965
FAHY	2.345	1.81	590	780	0.748345		FAHY	2.04	-0.41	590	780	0.243961
FAIH	2.166	2.22	540	660	0.815915		FAIH	2.033	0	540	660	0.752015
FAKH	2.08	-1.7	555	720	0.535855		FAKH	1.504	-3.92	555	636	0.547936
FALH	2.153	2.35	540	660	0.85287		FALH	1.901	0.13	540	660	0.674907
FANH	2.253	0.25	541	660	0.772226		FANH	1.963	-1.97	541	660	0.605609
FAQH	2.058	0.33	556	660	0.775929		FAQH	2.027	-1.89	556	660	0.58271
FARH	2.101	-0.71	583	720	0.756775		FARH	1.701	-2.93	583	612	0.433982
FATH	2.073	0.85	528	495	0.900759		FATH	1.839	-1.37	528	528	0.843894
FAVH	2.268	1.56	526	660	0.882775		FAVH	1.928	-0.66	526	583	0.773153
FAYH	2.332	1.81	590	780	0.754163		FAYH	2.083	-0.41	590	754	0.630436
FDAH	2	-2.54	542	660	0.423137		FDAH	2.1	-4.76	542	660	0.388172
FDDH	1.705	-5.68	586	720	0.485669		FDDH	1.734	-7.9	586	552	0.697274
FDEH	1.707	-5.67	599	696	0.392635		FDEH	1.796	-7.89	599	720	0.290821
FDFH	2.107	-0.33	618	784	0.284325		FDFH	2.301	-2.55	618	840	0.314331
FDGH	2.067	-3.19	528	660	0.510294		FDGH	2.174	-5.41	528	660	0.661402
FDHA	1.85	-2.54	542	660	0.510824		FDHA	1.877	-4.76	542	363	0.621234
FDHD	1.777	-5.68	586	720	0.511372		FDHD	1.928	-7.9	586	720	0.367724
FDHE	1.624	-5.67	599	504	0.416107		FDHE	1.896	-7.89	599	720	0.499734
FDHF	2.042	-0.33	618	630	0.403423		FDHF	2.354	-2.55	618	840	0.333825
FDHG	1.815	-3.19	528	660	0.471447		FDHG	1.8	-5.41	528	660	0.231414
FDHH	2.006	-2.15	608	840	0.319832		FDHH	1.77	-6.59	608	602	0.208981
FDHI	2.009	-0.92	584	720	0.33271		FDHI	1.985	-3.14	584	420	0.758854
FDHK	2.169	-4.84	599	780	0.344674		FDHK	2.014	-7.06	599	780	0.564292
FDHL	2.007	-0.79	584	720	0.719157		FDHL	2.161	-3.01	584	720	0.389564
FDHN	1.993	-2.89	585	720	0.628823		FDHN	1.975	-5.11	585	720	0.537835
FDHQ	1.93	-2.81	600	720	0.323527		FDHQ	1.921	-5.03	600	564	0.71076
FDHR	2.185	-3.85	627	780	0.354561		FDHR	1.894	-6.07	627	780	0.460953
FDHT	2.009	-2.29	572	720	0.636285		FDHT	1.994	-4.51	572	720	0.329676
FDHV	2.206	-1.58	570	720	0.587153		FDHV	1.971	-3.8	570	432	0.557747
FDHY	2.095	-1.33	634	770	0.624017		FDHY	2.247	-3.55	634	840	0.436786
FDIH	1.923	-0.92	584	672	0.329819		FDIH	1.999	-3.14	584	720	0.304743
FDKH	2.173	-4.84	599	780	0.52255		FDKH	2.024	-7.06	599	780	0.314493
FDLH	2.152	-0.79	584	720	0.573975		FDLH	2.118	-3.01	584	720	0.321682
FDNH	2.074	-2.89	585	720	0.586914		FDNH	1.939	-5.11	585	576	0.624505
FDQH	1.8	-2.81	600	636	0.379303		FDQH	1.945	-5.03	600	720	0.466216
FDRH	2.315	-3.85	627	780	0.456487		FDRH	1.85	-6.07	627	663	0.321795
FDTH	1.925	-2.29	572	420	0.649485		FDTH	2.127	-4.51	572	720	0.57388
FDVH	1.892	-1.58	570	396	0.705809		FDVH	2.171	-3.8	570	720	0.372697
FDYH	2.186	-1.33	634	840	0.407539		FDYH	2.073	-3.55	634	658	0.483037
FEAH	1.983	-2.53	555	660	0.583843		FEAH	2.158	-4.75	555	660	0.438303
FEDH	1.736	-5.67	599	720	0.690322		FEDH	1.766	-7.89	599	720	0.306716
FEEH	1.635	-5.66	612	720	0.296471		FEEH	1.954	-7.88	612	720	0.414837
FEFH	2.214	-0.32	631	840	0.580879		FEFH	2.251	-2.54	631	840	0.626911
FEGH	1.966	-3.18	541	660	0.368622		FEGH	1.988	-5.4	541	660	0.41556
FEHA	1.88	-2.53	555	660	0.462394		FEHA	1.985	-4.75	555	660	0.39472
FEHD	1.723	-5.67	599	672	0.332237		FEHD	1.875	-7.89	599	720	0.584264
FEHE	1.716	-5.66	612	720	0.279778		FEHE	1.813	-7.88	612	720	0.262184
FEHF	2.242	-0.32	631	840	0.600276		FEHF	2.289	-2.54	631	840	0.672585
FEHG	1.871	-3.18	541	660	0.611424		FEHG	1.902	-5.4	541	506	0.657178
FEHH	2.109	-2.14	621	840	0.602576		FEHH	1.788	-6.58	621	686	0.43262
FEHI	2.021	-0.91	597	720	0.58696		FEHI	2.094	-3.13	597	720	0.339316
FEHK	1.973	-4.83	612	429	0.661423		FEHK	1.872	-7.05	612	780	0.262679
FEHL	1.992	-0.78	597	720	0.598321		FEHL	1.939	-3	597	588	0.578578
FEHN	1.906	-2.88	598	720	0.528185		FEHN	1.902	-5.1	598	492	0.497677
FEHQ	1.927	-2.8	613	720	0.471795		FEHQ	1.967	-5.02	613	456	0.522333
FEHR	2.109	-3.84	640	780	0.394937		FEHR	1.876	-6.06	640	780	0.309203
FEHT	1.934	-2.28	585	540	0.571415		FEHT	2.145	-4.5	585	720	0.469181
FEHV	1.958	-1.57	583	720	0.759961		FEHV	2.05	-3.79	583	720	0.310389
FEHY	2.192	-1.32	647	840	0.517394		FEHY	2.119	-3.54	647	728	0.325925
FEIH	2.088	-0.91	597	720	0.554048		FEIH	2.126	-3.13	597	720	0.38242
FEKH	2.235	-4.83	612	780	0.420939		FEKH	2.024	-7.05	612	780	0.323115
FELH	2.099	-0.78	597	720	0.473807		FELH	2.069	-3	597	720	0.607172
FENH	1.937	-2.88	598	720	0.493473		FENH	2.029	-5.1	598	672	0.557664
FEQH	1.927	-2.8	613	720	0.301655		FEQH	2.039	-5.02	613	720	0.636099
FERH	2.288	-3.84	640	780	0.653925		FERH	2.003	-6.06	640	780	0.521529
FETH	2.054	-2.28	585	720	0.687871		FETH	2.126	-4.5	585	720	0.554441
FEVH	2.111	-1.57	583	720	0.495264		FEVH	2.091	-3.79	583	720	0.329915
FEYH	2.044	-1.32	647	840	0.288707		FEYH	1.987	-3.54	647	840	0.141791
FFAH	2.338	2.81	574	780	0.849294		FFAH	1.99	0.59	574	689	0.576181
FFDH	2.049	-0.33	618	840	0.281913		FFDH	1.983	-2.55	618	630	0.430111
FFEH	2.023	-0.32	631	840	0.23156		FFEH	2.202	-2.54	631	840	0.380335
FFFH	2.307	5.02	650	816	0.581331		FFFH	2.005	2.8	650	464	0.86793
FFGH	2.405	2.16	560	780	0.598347		FFGH	2.043	-0.06	560	663	0.502929
FFHA	2.318	2.81	574	780	0.780249		FFHA	2.139	0.59	574	780	0.508699
FFHD	2.078	-0.33	618	840	0.228109		FFHD	2.242	-2.55	618	840	0.497599
FFHE	2.246	-0.32	631	840	0.571344		FFHE	2.048	-2.54	631	560	0.521382
FFHF	2.44	5.02	650	960	0.504578		FFHF	2.183	2.8	650	960	0.26462
FFHG	2.228	2.16	560	663	0.749463		FFHG	2.08	-0.06	560	754	0.400163
FFHH	2.398	3.2	640	960	0.24883		FFHH	1.857	-1.24	640	688	0.631632
FFHI	2.464	4.43	616	840	0.892381		FFHI	2.164	2.21	616	840	0.628656
FFHK	2.167	0.51	631	900	0.482235		FFHK	1.922	-1.71	631	900	0.25566
FFHL	2.394	4.56	616	840	0.780103		FFHL	2.182	2.34	616	840	0.463992
FFHN	2.142	2.46	617	532	0.682681		FFHN	2.045	0.24	617	560	0.71304
FFHQ	2.334	2.54	632	840	0.71712		FFHQ	2.146	0.32	632	840	0.312157
FFHR	2.094	1.5	659	615	0.724674		FFHR	1.959	-0.72	659	900	0.269779
FFHT	2.464	3.06	604	840	0.700295		FFHT	2.278	0.84	604	840	0.443416
[truncated: 10,211 more rows]
